# Supplementary material
Source: publisher figshare collection journal article supplement (https://gsajournals.figshare.com/ndownloader/files/21729747)
Supplement: Supplementary file 1 [file 21729747]

## Sheet: Readme
File S3
Splicing changes following the SACY-1 depletion in the germline and the soma and in the data of Ortiz et al. (2014).
Overlapping Transcript	Alternate symbol for annotated gene based on overlapping WormBase annotation.
StringTie Gene ID	String Tie-derived annotation ID.
StringTie Defined Symbol	Symbol for Annotated gene based on StringTie annotation.
Affected Exon Coordinates	WBCel235/ce11 coordinates for the affected exon.
Splicing Event Type	Type of splicing event See Figure 7A legend for key.
Significant Dataset	Significant FDR in soma, germline or both soma and germline for separating panels in Figure 7A.
False Discovery Rate q-value Soma	FDR corrected p-value for depletion of SACY-1 in the soma.
Inclusion Level Difference Soma	Fractional difference between splicing events in SACY-1 soma-depleted samples.
False Discovery Rate q-value Germline	FDR corrected p-value for depletion of SACY-1 in the germline.
Inclusion Level Difference Germline	Fractional difference between splicing events in SACY-1 germline-depleted samples.
Relative Enrichment Sperm/Oocyte	Relative direction and whether a statistically significant change was observed for this splicing event in the Ortiz et al. (2014) data.
False Discovery Rate q-value Sperm/Oocyte	FDR corrected p-value for the Ortiz et al. (2014) dataset.
Inclusion Level Difference Sperm/Oocyte	Fractional difference between splicing events in Ortiz et al. (2014) samples.

## Sheet: Splicing Changes
Overlapping Transcript	StringTie Gene ID	StringTie Defined Symbol	Affected Exon Coordinates	Splicing Event Type	Significant Dataset	False Discovery Rate q-value Soma	Inclusion Level Difference Soma	False Discovery Rate q-value Germline	Inclusion Level Difference Germline	Relative Enrichment Sperm/Oocyte	False Discovery Rate q-value Sperm/Oocyte	Inclusion Level Difference Sperm/Oocyte
Y95D11A.3	MSTRG.2256	NA	chrI:10941573-10941810	A3SS	germline	0.0530342	-0.078	0	-0.302	Oocyte Enriched	0	0.418
C56C10.7	MSTRG.4643	NA	chrII:6586161-6586214	A3SS	germline	0.879392	-0.008	0	-0.216	Oocyte Enriched	0	0.084
C17H12.2	MSTRG.11909	NA	chrIV:6788431-6788724	A3SS	germline	0.381931	-0.045	3.11018e-12	-0.284	Oocyte Enriched	0	0.143
wdr-4	MSTRG.7922	NA	chrIII:6726485-6726582	A3SS	germline	0.181265	-0.056	2.08641e-11	-0.211	Oocyte Enriched	0	0.235
ZK370.4	MSTRG.8422	NA	chrIII:8730695-8730934	A3SS	germline	0.0692478	-0.156	7.30838e-10	-0.293	Oocyte Enriched	0	0.387
xol-1	MSTRG.24126	xol-1	chrX:8043396-8044409	A3SS	germline	0.513688	-0.137	3.52954e-08	0.612	not sig	NA	NA
ran-2	MSTRG.8203	NA	chrIII:7937180-7937303	A3SS	germline	0.448043	-0.03	1.82882e-07	-0.151	Oocyte Enriched	4.79539e-09	0.108
Y54G2A.36	MSTRG.9869	NA	chrIV:2900872-2901101	A3SS	germline	0.696849	-0.017	2.15876e-07	-0.143	not sig	0.141075	0.011
B0491.6	MSTRG.5851	B0491.6	chrII:11346798-11347722	A3SS	germline	0.143178	-0.083	2.47046e-07	-0.201	Oocyte Enriched	6.96121e-12	0.263
egl-45	MSTRG.8176	NA	chrIII:7827619-7827742	A3SS	germline	0.850034	0.02	5.09109e-07	-0.132	Oocyte Enriched	0	0.095
F20C5.10;elli-1	MSTRG.12464	NA	chrIV:8752697-8753581	A3SS	germline	0.608438	-0.009	1.40026e-06	-0.063	not sig	0.0514424	0.008
rnp-2	MSTRG.10114	NA	chrIV:4172324-4172396	A3SS	germline	1	0	2.12515e-06	-0.029	not sig	1	0.008
	MSTRG.7317	NA	chrIII:4052266-4052716	A3SS	germline	1	0.036	7.92749e-06	-0.318	not sig	1	-0.914
F10B5.2	MSTRG.5054	NA	chrII:8145174-8145530	A3SS	germline	0.597246	-0.005	9.21805e-06	-0.062	not sig	1	-0.004
C17F4.8	MSTRG.3740	NA	chrII:3231217-3231475	A3SS	germline	1	0.004	1.03854e-05	-0.224	not sig	NA	NA
hrp-2	MSTRG.2462	NA	chrI:12060266-12060959	A3SS	germline	0.388556	-0.012	1.28136e-05	-0.055	Oocyte Enriched	0	0.082
bath-43	MSTRG.8780	NA	chrIII:10092421-10092829	A3SS	germline	0.0825917	-0.032	1.29363e-05	-0.073	Oocyte Enriched	1.23353e-13	0.086
lin-54	MSTRG.13693	NA	chrIV:13241442-13241551	A3SS	germline	0.78876	-0.017	2.00159e-05	-0.168	Oocyte Enriched	0	0.448
Y59A8B.21	MSTRG.21358	NA	chrV:17990527-17990618	A3SS	germline	1	-0.022	2.38034e-05	-0.129	Oocyte Enriched	7.2472e-07	0.031
T05A7.13	MSTRG.4044	NA	chrII:4660335-4660738	A3SS	germline	0.793597	0.084	4.27765e-05	0.287	not sig	NA	NA
npp-6	MSTRG.861	NA	chrI:5179896-5180024	A3SS	germline	0.284655	-0.112	6.46654e-05	-0.27	Oocyte Enriched	0	0.422
lin-54	MSTRG.13693	NA	chrIV:13241235-13241391	A3SS	germline	0.135206	0.175	7.47729e-05	-0.136	Oocyte Enriched	9.98159e-12	0.149
	MSTRG.7906	NA	chrIII:6622551-6622655	A3SS	germline	0.0630666	0.302	9.22983e-05	-0.492	not sig	1	0.132
daf-16	MSTRG.2200	H36N01.4	chrI:10750886-10750984	A3SS	germline	0.0804216	-0.101	0.000166825	-0.131	not sig	0.720175	-0.031
fbxa-26	MSTRG.6858	NA	chrIII:1342348-1342523	A3SS	germline	0.205258	-0.173	0.000171086	0.461	not sig	NA	NA
Y54G2A.36	MSTRG.9869	NA	chrIV:2900872-2901365	A3SS	germline	1	-0.005	0.000186601	-0.102	not sig	1	0.003
srw-145	MSTRG.20600	NA	chrV:13939076-13939602	A3SS	germline	0.144098	-0.101	0.000186601	-0.202	not sig	NA	NA
F19C7.3	MSTRG.10222	NA	chrIV:4598489-4598761	A3SS	germline	0.433649	0.044	0.000186601	-0.28	not sig	NA	NA
che-7	MSTRG.18804	NA	chrV:7961538-7961680	A3SS	germline	0.0750217	-0.237	0.000197574	0.437	not sig	NA	NA
unc-64;set-25	MSTRG.9295	NA	chrIII:13281420-13284023	A3SS	germline	1	0.002	0.000246213	0.04	not sig	0.119791	0.173
sra-36	MSTRG.4026	NA	chrII:4539445-4539635	A3SS	germline	0.32859	0.42	0.000268366	-0.503	not sig	NA	NA
	MSTRG.7054	E02H9.6	chrIII:2443919-2444957	A3SS	germline	0.805736	0.033	0.000268366	0.364	not sig	NA	NA
pqe-1	MSTRG.7630	NA	chrIII:5315808-5316045	A3SS	germline	0.801728	-0.02	0.000274112	-0.149	Oocyte Enriched	0	0.221
C08H9.16	MSTRG.5503	NA	chrII:9893473-9893713	A3SS	germline	0.906408	-0.004	0.000301057	-0.053	Oocyte Enriched	0.00577087	0.02
F25E5.4	MSTRG.18675	NA	chrV:7448995-7449512	A3SS	germline	0.826118	0.093	0.000337611	-0.259	not sig	NA	NA
F25B4.5	MSTRG.18224	NA	chrV:5681479-5682011	A3SS	germline	1	-0.004	0.000397578	-0.138	not sig	0.630036	0.002
pqn-87	MSTRG.6073	NA	chrII:12215655-12215775	A3SS	germline	0.775026	-0.016	0.000407382	-0.111	Oocyte Enriched	0	0.151
cpb-1	MSTRG.8570	NA	chrIII:9323176-9323294	A3SS	germline	0.762821	0.045	0.000487604	-0.293	Oocyte Enriched	0	0.636
ZK688.11	MSTRG.8191	NA	chrIII:7884026-7884202	A3SS	germline	0.0978195	-0.014	0.000491618	-0.024	Oocyte Enriched	4.71955e-06	0.031
nurf-1	MSTRG.6458	NA	chrII:14397084-14397222	A3SS	germline	0.512764	-0.091	0.000493328	-0.278	Oocyte Enriched	7.52343e-10	0.241
gld-1	MSTRG.1459	NA	chrI:7696692-7696845	A3SS	germline	0.0675848	-0.064	0.000493328	-0.115	Oocyte Enriched	0.0342352	0.029
clh-4	MSTRG.23051	clh-4	chrX:4096373-4096448	A3SS	germline	1	0.1	0.000540449	-0.321	not sig	NA	NA
Y102A5C.5	MSTRG.21309	NA	chrV:16928935-16928997	A3SS	germline	0.995281	0.012	0.000547881	-0.273	Oocyte Enriched	0	0.325
T25B2.4;T13C5.3	MSTRG.23610	NA	chrX:6178516-6179469	A3SS	germline	0.992691	-0.069	0.000566818	-0.382	not sig	NA	NA
slc-25A32	MSTRG.5098	slc-25A32	chrII:8276880-8277105	A3SS	germline	0.536445	0.031	0.000608976	-0.113	Oocyte Enriched	0	0.196
mdt-8	MSTRG.5900	NA	chrII:11527240-11527370	A3SS	germline	0.21092	-0.069	0.000688223	-0.178	Oocyte Enriched	0	0.423
rcor-1	MSTRG.4	NA	chrI:26589-26690	A3SS	germline	0.12525	-0.109	0.000869761	-0.219	Oocyte Enriched	0	0.237
W09B6.4	MSTRG.3245	NA	chrII:1133790-1134057	A3SS	germline	1	-0.002	0.000957052	-0.119	Oocyte Enriched	1.05766e-10	0.119
F28F8.9	MSTRG.21032	mdt-28	chrV:15578078-15578168	A3SS	germline	0.429835	-0.037	0.00108928	0.115	not sig	0.0813144	-0.057
W03G11.3	MSTRG.25123	NA	chrX:12103120-12103290	A3SS	germline	0.590523	-0.038	0.00132382	-0.435	not sig	NA	NA
trm-1	MSTRG.20665	NA	chrV:14185390-14185494	A3SS	germline	0.450035	-0.021	0.00136773	-0.08	Oocyte Enriched	0.0435983	0.028
mei-1;abts-1	MSTRG.1576	mei-1	chrI:8296540-8296940	A3SS	germline	0.231092	-0.083	0.00137704	-0.145	Oocyte Enriched	0	0.431
hrpk-1	MSTRG.1145	NA	chrI:6319441-6319635	A3SS	germline	0.803735	-0.023	0.00142862	-0.12	Oocyte Enriched	7.58627e-11	0.108
ZC196.1	MSTRG.19002	NA	chrV:8744674-8744783	A3SS	germline	0.653225	0.103	0.00150723	-0.173	not sig	NA	NA
mtm-3	MSTRG.7267	NA	chrIII:3792058-3792822	A3SS	germline	1	-0.004	0.00158245	-0.079	Oocyte Enriched	0	0.379
set-22	MSTRG.19462	set-22	chrV:10437955-10438176	A3SS	germline	0.843526	-0.003	0.00169883	-0.04	Oocyte Enriched	0.00360155	0.021
klp-3	MSTRG.4981	NA	chrII:7843324-7843941	A3SS	germline	0.990584	0.014	0.00169883	-0.149	not sig	NA	NA
F25H8.1	MSTRG.12783	F25H8.1	chrIV:9931831-9932028	A3SS	germline	0.642182	0.007	0.00181939	-0.022	not sig	1	-0.001
F11A10.5	MSTRG.13400	NA	chrIV:12094691-12094774	A3SS	germline	0.507818	-0.008	0.00191218	-0.029	not sig	1	0.008
smrc-1	MSTRG.7864	NA	chrIII:6391538-6391691	A3SS	germline	0.0747557	0.087	0.00216323	-0.071	not sig	0.433733	0.013
ubxn-6;H06H21.37	MSTRG.10269	NA	chrIV:4808950-4809502	A3SS	germline	1	-0.005	0.0023176	-0.125	Oocyte Enriched	0	0.293
cyk-7	MSTRG.8167	NA	chrIII:7794265-7794358	A3SS	germline	1	0.005	0.00266713	-0.109	Oocyte Enriched	0	0.139
ubxn-3	MSTRG.3006	NA	chrII:217264-217524	A3SS	germline	0.635523	-0.028	0.00281522	-0.099	Oocyte Enriched	0	0.222
jhdm-1	MSTRG.7872	NA	chrIII:6457123-6457460	A3SS	germline	0.984875	0.011	0.00291317	-0.191	Oocyte Enriched	2.67361e-06	0.136
Y54F10BM.6	MSTRG.7026	NA	chrIII:2263986-2266512	A3SS	germline	0.278304	0.055	0.00291689	-0.226	not sig	1	-1
F40G9.15	MSTRG.6651	NA	chrIII:182227-182662	A3SS	germline	0.721683	0.137	0.00291689	0.301	not sig	NA	NA
C09G9.8	MSTRG.12491	NA	chrIV:8881612-8881837	A3SS	germline	0.995219	0.022	0.00291762	-0.209	not sig	NA	NA
math-28	MSTRG.3427	math-28	chrII:1766209-1766623	A3SS	germline	1	0.077	0.00317307	0.202	not sig	NA	NA
moc-3	MSTRG.12321	NA	chrIV:8131064-8131440	A3SS	germline	0.300584	-0.019	0.0032115	-0.05	not sig	1	-0.006
linc-9	MSTRG.560	NA	chrI:3703985-3704139	A3SS	germline	0.256376	-0.037	0.0034238	-0.075	not sig	1	0.087
C24F3.2	MSTRG.12888	NA	chrIV:10223314-10223524	A3SS	germline	0.818341	0.011	0.00343781	-0.071	Oocyte Enriched	0.00349854	0.039
bath-12	MSTRG.3595	NA	chrII:2515543-2515943	A3SS	germline	1	0.008	0.00343781	-0.085	not sig	1	0.031
T12F5.2	MSTRG.565	NA	chrI:3731514-3731879	A3SS	germline	0.897871	-0.028	0.00347666	0.161	Oocyte Enriched	7.5365e-05	-0.159
mbk-1	MSTRG.25706	NA	chrX:14822406-14822588	A3SS	germline	0.608679	-0.067	0.00377115	-0.09	not sig	1	0.28
hse-5	MSTRG.7376	NA	chrIII:4346387-4346492	A3SS	germline	0.653631	0.014	0.0038264	-0.095	not sig	1	0.046
glr-2;B0280.21	MSTRG.8031	NA	chrIII:7142602-7143052	A3SS	germline	NA	NA	0.0038264	-0.216	not sig	1	1
ccm-2;egl-4	MSTRG.9694	cmk-1	chrIV:1847096-1848226	A3SS	germline	1	0.035	0.00414948	-0.144	not sig	1	-0.124
F58A4.6	MSTRG.8650	NA	chrIII:9614749-9614926	A3SS	germline	0.431235	-0.034	0.00445861	-0.097	Oocyte Enriched	0.000240083	0.12
Y42H9AR.4	MSTRG.12312	NA	chrIV:8111941-8112091	A3SS	germline	0.841207	0.013	0.00463836	-0.083	Oocyte Enriched	2.64706e-06	0.077
trr-1	MSTRG.5949	NA	chrII:11668132-11668751	A3SS	germline	0.249867	-0.138	0.00485923	-0.298	Oocyte Enriched	5.20653e-14	0.207
coq-2	MSTRG.7975	NA	chrIII:6938406-6938545	A3SS	germline	0.27474	-0.042	0.00496762	-0.11	not sig	0.138348	0.028
kin-18	MSTRG.7796	NA	chrIII:6120703-6120823	A3SS	germline	0.250513	-0.025	0.00508361	0.057	not sig	0.0605274	0.02
alp-1	MSTRG.12484	NA	chrIV:8860356-8860723	A3SS	germline	0.0655625	-0.076	0.00508361	-0.114	not sig	0.292209	-0.094
twk-34	MSTRG.21051	NA	chrV:15705826-15706264	A3SS	germline	0.0931442	-0.104	0.00508361	0.077	not sig	NA	NA
attf-6	MSTRG.2588	NA	chrI:12798037-12798403	A3SS	germline	0.608438	-0.035	0.00508708	-0.238	Oocyte Enriched	5.48784e-06	0.065
ced-7	MSTRG.8635	NA	chrIII:9575860-9576852	A3SS	germline	0.21092	0.164	0.00574392	0.24	not sig	0.697174	0.044
spd-2	MSTRG.1737	spd-2	chrI:8969697-8969946	A3SS	germline	0.584205	-0.018	0.00574392	-0.056	not sig	1	0.01
vps-39	MSTRG.20631	vps-39	chrV:14035404-14035997	A3SS	germline	0.0673872	-0.094	0.00600797	-0.141	Oocyte Enriched	0	0.378
hpo-10	MSTRG.7745	NA	chrIII:5880547-5881184	A3SS	germline	NA	NA	0.00611709	0.03	not sig	NA	NA
W02D7.5	MSTRG.18892	NA	chrV:8298725-8298807	A3SS	germline	1	-0.001	0.00621111	-0.042	not sig	1	0.006
jmjd-3.1	MSTRG.24260	NA	chrX:8571447-8571958	A3SS	germline	0.680994	-0.137	0.00627722	-0.079	not sig	NA	NA
C06E1.11	MSTRG.8392	NA	chrIII:8615894-8616244	A3SS	germline	0.300584	-0.189	0.00655668	-0.384	not sig	0.896809	0.034
F26F4.12	MSTRG.7542	NA	chrIII:4909702-4909906	A3SS	germline	1	-0.01	0.00655668	-0.026	not sig	1	0
F31E3.2	MSTRG.7988	NA	chrIII:6976164-6976417	A3SS	germline	0.283273	-0.04	0.00711696	-0.102	not sig	1	-0.22
sumv-1	MSTRG.7614	NA	chrIII:5251843-5251896	A3SS	germline	0.616285	0.042	0.00784752	-0.197	Oocyte Enriched	0	0.355
T04B8.2	MSTRG.3112	NA	chrII:630971-631295	A3SS	germline	1	0	0.00794093	-0.188	not sig	NA	NA
math-21	MSTRG.3480	NA	chrII:1995265-1995718	A3SS	germline	0.0905157	-0.148	0.00795799	0.164	not sig	NA	NA
ugt-5	MSTRG.20286	NA	chrV:12792288-12792514	A3SS	germline	0.81763	0.01	0.00799882	-0.044	not sig	NA	NA
spat-2	MSTRG.8961	NA	chrIII:11042085-11042259	A3SS	germline	0.090747	-0.14	0.00807053	-0.21	Oocyte Enriched	0	0.204
Y40D12A.1	MSTRG.7905	NA	chrIII:6616013-6616333	A3SS	germline	0.972909	-0.013	0.00807053	-0.182	Oocyte Enriched	1.64789e-09	0.111
aph-2	MSTRG.2099	ears-1	chrI:10344552-10344831	A3SS	germline	0.314247	-0.019	0.00807053	-0.046	Oocyte Enriched	3.15436e-05	0.087
jmjd-1.2	MSTRG.10235	NA	chrIV:4661356-4661641	A3SS	germline	0.218409	-0.082	0.00826677	0.126	Oocyte Enriched	2.83468e-06	-0.04
mys-2	MSTRG.2820	NA	chrI:14126758-14127199	A3SS	germline	0.252567	-0.125	0.00831974	-0.184	Oocyte Enriched	0	0.308
Y77E11A.7	MSTRG.9622	NA	chrIV:1415669-1415909	A3SS	germline	0.65248	-0.043	0.00898001	-0.082	Oocyte Enriched	0.0164898	0.048
F56C9.6	MSTRG.8074	NA	chrIII:7310162-7310250	A3SS	germline	0.558279	-0.017	0.00898001	0.049	not sig	0.0905909	0.013
tdc-1	MSTRG.5096	NA	chrII:8270946-8271269	A3SS	germline	1	-0.002	0.00930153	-0.089	Oocyte Enriched	0	0.363
rbm-26	MSTRG.7707	rbm-26	chrIII:5712607-5713700	A3SS	germline	0.136646	-0.109	0.00975963	-0.143	Oocyte Enriched	0	0.24
T22C1.3	MSTRG.1501	NA	chrI:7938911-7939194	A3SS	germline	0.677817	0.007	0.00980701	-0.024	Oocyte Enriched	0.0465063	0.017
C56A3.6	MSTRG.20490	NA	chrV:13555839-13556163	A3SS	germline	0.154363	-0.066	0.00984115	-0.085	Oocyte Enriched	0	0.326
kin-18	MSTRG.7796	NA	chrIII:6122526-6122772	A3SS	germline	1	-0.006	0.00984115	-0.071	Oocyte Enriched	0	0.258
jmjd-3.1	MSTRG.24260	NA	chrX:8571394-8571958	A3SS	germline	0.582918	-0.075	0.00984115	-0.087	not sig	1	0.377
T26A5.2	MSTRG.7875	NA	chrIII:6470115-6470243	A3SS	germline	0.467529	-0.068	0.00992678	-0.209	Oocyte Enriched	0	0.173
hpo-32	MSTRG.882	NA	chrI:5300139-5300206	A3SS	germline	1	-0.007	0.00992678	-0.24	Oocyte Enriched	0	0.143
R11G1.6	MSTRG.22944	R11G1.6	chrX:3639765-3639842	A3SS	germline	1	-0.006	0.0099807	0.054	not sig	NA	NA
C15H9.3	MSTRG.23584	NA	chrX:6117683-6117856	A3SS	germline	0.78743	0.026	0.0100168	0.44	not sig	NA	NA
adr-1	MSTRG.1472	NA	chrI:7775195-7775733	A3SS	germline	0.157435	-0.121	0.0100593	-0.193	Oocyte Enriched	0.000100721	0.129
ceh-43	MSTRG.7409	NA	chrIII:4447361-4447601	A3SS	germline	1	0.002	0.0104599	-0.066	not sig	1	0.027
ubr-5	MSTRG.1704	NA	chrI:8837312-8837526	A3SS	germline	0.704449	-0.059	0.0108358	-0.226	Oocyte Enriched	0	0.416
C29E4.13	MSTRG.8202	NA	chrIII:7927994-7928088	A3SS	germline	0.28439	-0.063	0.0108594	-0.114	not sig	1	0.026
rev-1	MSTRG.4996	NA	chrII:7903236-7903435	A3SS	germline	0.830593	0.023	0.0129629	-0.085	Oocyte Enriched	0.000909383	0.051
hum-2	MSTRG.19171	NA	chrV:9393171-9393427	A3SS	germline	0.85666	0.024	0.0132843	-0.113	Oocyte Enriched	0	0.293
crn-2;zhit-1	MSTRG.18199	NA	chrV:5595773-5595819	A3SS	germline	1	0.001	0.0134493	-0.026	not sig	1	0.003
C25G4.7	MSTRG.13515	NA	chrIV:12457273-12457781	A3SS	germline	0.872034	0.071	0.0135687	-0.333	not sig	1	-0.476
wip-1	MSTRG.7567	NA	chrIII:5019838-5019934	A3SS	germline	0.436772	-0.097	0.013975	-0.183	Oocyte Enriched	0	0.369
eif-2Bepsilon	MSTRG.5197	NA	chrII:8663154-8663249	A3SS	germline	0.608679	-0.036	0.0144077	-0.191	Oocyte Enriched	0	0.342
rnh-1.0	MSTRG.4152	NA	chrII:4996974-4997064	A3SS	germline	1	-0.007	0.0144624	0.086	not sig	1	0.013
C06C3.4	MSTRG.5363	C06C3.4	chrII:9374693-9374899	A3SS	germline	0.0757101	-0.031	0.0146046	0.217	not sig	NA	NA
cul-4	MSTRG.4838	NA	chrII:7302405-7302491	A3SS	germline	0.406798	-0.017	0.0151205	-0.038	Oocyte Enriched	0.000249139	0.029
shc-1	MSTRG.139	NA	chrI:971459-972086	A3SS	germline	0.0663755	0.211	0.0151205	0.179	not sig	1	0.02
T07E3.3	MSTRG.7969	NA	chrIII:6904368-6904502	A3SS	germline	0.0581364	-0.1	0.0151484	-0.157	Oocyte Enriched	0	0.462
rlbp-1	MSTRG.1457	NA	chrI:7693561-7694215	A3SS	germline	0.122972	-0.016	0.0154741	-0.022	Oocyte Enriched	0.00792605	0.016
egl-27	MSTRG.4718	NA	chrII:6846530-6847040	A3SS	germline	0.281215	-0.085	0.0171058	-0.123	Oocyte Enriched	2.70831e-14	0.198
gopc-1	MSTRG.2831	NA	chrI:14186684-14186849	A3SS	germline	0.691913	-0.04	0.0171058	-0.076	not sig	NA	NA
usp-5	MSTRG.1085	NA	chrI:6112544-6112643	A3SS	germline	0.118372	-0.126	0.0172718	-0.14	Oocyte Enriched	0	0.265
ddl-3	MSTRG.6451	NA	chrII:14343701-14343834	A3SS	germline	0.281215	0.028	0.0174472	-0.041	not sig	0.14777	0.017
R10D12.13	MSTRG.20591	NA	chrV:13962612-13962727	A3SS	germline	0.369781	0.047	0.0177998	0.098	Sperm Enriched	0.000299266	0.121
C30G12.6	MSTRG.4836	NA	chrII:7292034-7292400	A3SS	germline	0.865553	0.022	0.0178144	-0.141	Oocyte Enriched	7.64586e-15	0.256
srz-99	MSTRG.21266	NA	chrV:16731005-16731170	A3SS	germline	0.544155	-0.092	0.0181419	0.172	not sig	NA	NA
C14B1.9	MSTRG.7253	NA	chrIII:3726084-3726345	A3SS	germline	1	-0.001	0.018758	-0.039	Oocyte Enriched	0	0.164
rme-1	MSTRG.18358	rme-1	chrV:6214819-6215009	A3SS	germline	0.220692	-0.191	0.0197097	-0.342	Oocyte Enriched	2.51639e-07	0.157
pqn-68	MSTRG.20335	NA	chrV:12952737-12952930	A3SS	germline	0.420529	-0.038	0.0199328	0.081	Sperm Enriched	0.00147657	0.073
F20H11.1	MSTRG.7899	NA	chrIII:6591705-6591854	A3SS	germline	1	-0.004	0.0204393	0.052	not sig	1	0.003
tpra-1;anr-8	MSTRG.12503	NA	chrIV:8960383-8960690	A3SS	germline	0.085413	-0.013	0.0206169	0.161	not sig	1	-0.003
nbs-1;C09H10.19	MSTRG.5787	nbs-1	chrII:11095111-11095506	A3SS	germline	0.373767	-0.073	0.0207376	-0.179	Oocyte Enriched	0	0.201
attf-3	MSTRG.6627	NA	chrIII:84971-85174	A3SS	germline	0.531053	-0.144	0.0207509	-0.318	Oocyte Enriched	0	0.466
F23H12.7	MSTRG.20154	NA	chrV:12372705-12372969	A3SS	germline	0.235151	-0.06	0.0207694	-0.091	not sig	NA	NA
C31H1.8	MSTRG.11172	NA	chrIV:5813510-5813613	A3SS	germline	1	-0.012	0.0215788	-0.129	Oocyte Enriched	0	0.443
nhl-2	MSTRG.7536	NA	chrIII:4898184-4898536	A3SS	germline	0.67776	-0.047	0.0217167	-0.098	Oocyte Enriched	4.66259e-12	0.262
K02F3.2	MSTRG.6736	NA	chrIII:845843-846002	A3SS	germline	0.19653	-0.151	0.0217167	0.446	not sig	1	0.023
cid-1	MSTRG.7600	NA	chrIII:5175622-5176624	A3SS	germline	0.0706879	-0.163	0.0220018	-0.176	Oocyte Enriched	0	0.329
F48E8.2	MSTRG.7649	NA	chrIII:5467416-5467992	A3SS	germline	1	0.005	0.0231884	-0.024	not sig	0.654043	-0.011
C17G10.13;cdc-14	MSTRG.4345	NA	chrII:5588934-5589616	A3SS	germline	0.388556	0.111	0.0235522	-0.19	not sig	1	-0.022
H06H21.8	MSTRG.10278	H06H21.8	chrIV:4817387-4817716	A3SS	germline	0.71887	-0.025	0.0241084	-0.055	not sig	1	0.016
Y57G11C.36	MSTRG.15220	NA	chrIV:14773111-14773246	A3SS	germline	0.280109	-0.084	0.0246809	0.186	not sig	1	-0.066
vha-20;sym-4	MSTRG.25551	NA	chrX:14164330-14165177	A3SS	germline	0.104181	0.069	0.0247859	-0.056	not sig	1	0.054
K08E7.5	MSTRG.13548	NA	chrIV:12576056-12576543	A3SS	germline	1	-0.067	0.0247859	-0.144	not sig	NA	NA
ulp-5	MSTRG.1269	NA	chrI:6813385-6813586	A3SS	germline	0.737564	-0.033	0.0258956	-0.169	Oocyte Enriched	0	0.152
rsr-1	MSTRG.2280	NA	chrI:11181651-11181824	A3SS	germline	0.494054	0.032	0.0267708	-0.087	Oocyte Enriched	1.99185e-06	0.033
cyh-1	MSTRG.3829	NA	chrII:3506756-3506864	A3SS	germline	0.684813	0.029	0.0274223	-0.073	Oocyte Enriched	0	0.188
mut-15	MSTRG.20894	mut-15	chrV:15003845-15003980	A3SS	germline	0.892534	-0.022	0.028114	-0.043	not sig	1	0
spd-5	MSTRG.860	spd-5	chrI:5175230-5175427	A3SS	germline	1	0.003	0.028499	-0.055	Oocyte Enriched	1.18897e-11	0.071
rde-1	MSTRG.19331	rmd-2	chrV:9990847-9990910	A3SS	germline	0.207159	-0.022	0.028499	-0.038	Oocyte Enriched	0.00508947	0.031
trpp-4	MSTRG.19171	NA	chrV:9400609-9400726	A3SS	germline	0.553635	-0.007	0.028499	-0.018	not sig	1	0.001
nas-33	MSTRG.23681	NA	chrX:6454865-6454920	A3SS	germline	0.720888	0.142	0.0285355	0.461	not sig	NA	NA
unc-13	MSTRG.1412	unc-13	chrI:7433089-7433628	A3SS	germline	0.589181	-0.055	0.0287858	-0.142	not sig	1	0.5
T10C6.7;hpo-42	MSTRG.21107	T10C6.7	chrV:16029186-16029992	A3SS	germline	0.237434	0.087	0.0288243	-0.25	not sig	1	-0.394
K11H3.4	MSTRG.8706	NA	chrIII:9833082-9833291	A3SS	germline	0.931806	-0.01	0.0295962	-0.087	Oocyte Enriched	0	0.59
spe-48	MSTRG.262	spe-48	chrI:1953348-1953624	A3SS	germline	0.961381	-0.018	0.0295962	0.113	not sig	0.604987	-0.02
F41E7.7;F41E7.18	MSTRG.24694	NA	chrX:10311652-10312182	A3SS	germline	0.708941	0.007	0.0295962	0.039	not sig	1	0.911
Y2H9A.4	MSTRG.20466	NA	chrV:13446093-13446204	A3SS	germline	1	-0.026	0.0295962	-0.342	not sig	NA	NA
pir-1	MSTRG.5326	pir-1	chrII:9177948-9178053	A3SS	germline	0.135206	-0.022	0.029921	-0.037	Oocyte Enriched	0	0.057
fbxa-193	MSTRG.21630	NA	chrV:17653802-17654485	A3SS	germline	0.984875	0.016	0.029921	-0.053	Oocyte Enriched	0.000485895	0.03
mig-1	MSTRG.138	mig-1	chrI:950846-950967	A3SS	germline	0.228733	0.126	0.0302359	0.192	not sig	1	0.196
cfim-2;D1046.18	MSTRG.12500	NA	chrIV:8929815-8930434	A3SS	germline	0.163127	-0.088	0.0306732	0.116	Oocyte Enriched	2.16976e-11	-0.229
flcn-1	MSTRG.4747	NA	chrII:6932202-6932278	A3SS	germline	0.391723	-0.092	0.0307174	-0.139	Oocyte Enriched	0	0.507
C34C6.4	MSTRG.5202	NA	chrII:8697603-8697919	A3SS	germline	0.691913	-0.03	0.0307174	-0.09	Oocyte Enriched	0	0.071
ztf-23	MSTRG.455	ztf-23	chrI:3058517-3058582	A3SS	germline	0.594747	0.007	0.0307174	-0.027	not sig	0.154592	0.004
Y48G1C.8	MSTRG.13	Y48G1C.8	chrI:100138-100338	A3SS	germline	0.518021	-0.09	0.0316547	-0.187	Oocyte Enriched	0.000176621	0.138
zen-4;M03D4.4	MSTRG.11513	zen-4	chrIV:6120899-6121775	A3SS	germline	0.872034	-0.005	0.0322769	0.04	Oocyte Enriched	0	-0.292
edc-4	MSTRG.499	NA	chrI:3343333-3343629	A3SS	germline	0.170256	-0.126	0.0329776	-0.147	Oocyte Enriched	0	0.481
sec-8	MSTRG.2118	NA	chrI:10449122-10449267	A3SS	germline	0.569762	-0.028	0.0333865	-0.047	Oocyte Enriched	1.21021e-07	0.05
plk-3	MSTRG.12142	NA	chrIV:7471943-7472349	A3SS	germline	0.655986	0.007	0.0336403	-0.032	not sig	1	0.002
larp-1	MSTRG.7565	NA	chrIII:5016829-5017164	A3SS	germline	0.393942	-0.022	0.034822	-0.036	Oocyte Enriched	2.15634e-06	0.02
mtm-6	MSTRG.9307	mtm-6	chrIII:13352615-13353562	A3SS	germline	0.283442	-0.079	0.034822	-0.122	Oocyte Enriched	0.0295613	0.07
tag-115	MSTRG.13691	tag-115	chrIV:13238755-13238886	A3SS	germline	0.661387	-0.014	0.0366613	-0.075	Oocyte Enriched	1.64673e-10	0.081
R07H5.9	MSTRG.13147	NA	chrIV:11207178-11207566	A3SS	germline	1	-0.005	0.0372465	-0.427	not sig	NA	NA
Y116A8C.30	MSTRG.16940	NA	chrIV:17102157-17102245	A3SS	germline	0.27355	0.019	0.0374687	0.036	Sperm Enriched	1.22333e-05	0.041
unc-98;pcyt-1	MSTRG.23995	NA	chrX:7572000-7572616	A3SS	germline	1	-0.002	0.0375389	-0.058	not sig	0.175361	0.108
Y48E1C.2	MSTRG.6290	NA	chrII:13424966-13425065	A3SS	germline	0.832869	0.017	0.0383257	-0.079	Oocyte Enriched	0.00584292	0.078
gsr-1	MSTRG.7242	NA	chrIII:3651322-3651583	A3SS	germline	1	0	0.0383257	-0.171	not sig	0.177853	0.098
smg-8	MSTRG.6469	smg-8	chrII:14442917-14443463	A3SS	germline	0.27355	-0.086	0.0388362	-0.149	Oocyte Enriched	0	0.222
taf-1	MSTRG.2777	NA	chrI:13875702-13876286	A3SS	germline	0.327559	-0.12	0.0393561	-0.207	Oocyte Enriched	0	0.164
zwl-1	MSTRG.323	NA	chrI:2403335-2403438	A3SS	germline	0.973932	0	0.0396601	-0.063	Oocyte Enriched	3.77959e-08	0.025
F18E9.8	MSTRG.24261	NA	chrX:8579922-8580145	A3SS	germline	1	-0.327	0.0396601	0.369	not sig	NA	NA
gld-4	MSTRG.1775	NA	chrI:9121733-9122398	A3SS	germline	0.399452	-0.074	0.0398576	-0.132	Oocyte Enriched	0	0.413
prp-8	MSTRG.8261	NA	chrIII:8165430-8165498	A3SS	germline	1	0.021	0.0400041	-0.062	not sig	1	-0.025
F52B5.2	MSTRG.1581	NA	chrI:8317423-8317720	A3SS	germline	1	-0.005	0.0402708	-0.015	not sig	0.685566	0.005
gmps-1	MSTRG.5721	NA	chrII:10868337-10868442	A3SS	germline	0.719811	0.035	0.0408754	-0.174	Oocyte Enriched	1.60792e-08	0.114
R11D1.10	MSTRG.20262	NA	chrV:12730044-12730204	A3SS	germline	0.0542066	-0.063	0.0408754	-0.073	Oocyte Enriched	0.00337039	0.098
nfi-1	MSTRG.4901	NA	chrII:7540565-7540870	A3SS	germline	1	-0.003	0.0408754	-0.03	not sig	0.373363	0.008
F46B6.5	MSTRG.19283	NA	chrV:9780753-9781326	A3SS	germline	0.449946	-0.036	0.040883	-0.101	not sig	0.485023	-0.008
parg-1	MSTRG.12463	NA	chrIV:8747322-8747936	A3SS	germline	0.214298	-0.079	0.0417813	0.051	Oocyte Enriched	0	-0.05
C38C3.4	MSTRG.17431	NA	chrV:1483076-1484015	A3SS	germline	0.0805872	-0.042	0.0420392	-0.045	not sig	1	-0.126
pmk-3	MSTRG.12324	F42G8.16	chrIV:8140245-8140497	A3SS	germline	0.260462	-0.09	0.0420392	0.183	not sig	1	-0.018
C04E6.11	MSTRG.18293	NA	chrV:5917421-5917549	A3SS	germline	1	-0.011	0.0424096	-0.144	Oocyte Enriched	6.04105e-08	0.053
cogc-2	MSTRG.11996	NA	chrIV:7038953-7039153	A3SS	germline	0.588236	-0.09	0.0424096	0.175	Sperm Enriched	0.022557	0.02
R148.3	MSTRG.7166	NA	chrIII:3176816-3177328	A3SS	germline	1	0.016	0.0424096	-0.176	Oocyte Enriched	0.0477617	0.031
B0001.2	MSTRG.13415	NA	chrIV:12149004-12149373	A3SS	germline	0.866286	0.004	0.0424096	-0.021	not sig	0.889326	0.006
acd-4	MSTRG.18977	NA	chrV:8639584-8639663	A3SS	germline	0.913442	-0.061	0.0425736	-0.454	not sig	NA	NA
T23E1.1	MSTRG.9911	T23E1.1	chrIV:3155001-3155190	A3SS	germline	1	-0.121	0.0428473	0.138	not sig	1	0.103
lsy-22	MSTRG.1463	NA	chrI:7705966-7706621	A3SS	germline	0.28878	-0.068	0.0432371	-0.13	not sig	0.252315	0.039
F27C1.11	MSTRG.928	NA	chrI:5436673-5436774	A3SS	germline	1	0.028	0.0432648	0.342	not sig	NA	NA
cutl-15	MSTRG.5267	cutl-15	chrII:8944541-8944661	A3SS	germline	0.147596	0.275	0.0435414	-0.071	not sig	NA	NA
taf-9;T12D8.5	MSTRG.9360	NA	chrIII:13625773-13626007	A3SS	germline	0.755531	-0.008	0.0438468	-0.037	Oocyte Enriched	0	0.136
W03A5.6	MSTRG.7643	W03A5.6	chrIII:5440111-5440215	A3SS	germline	0.773397	-0.075	0.0438778	-0.205	Oocyte Enriched	0	0.339
fncm-1	MSTRG.863	NA	chrI:5192886-5192983	A3SS	germline	0.608078	0.166	0.0438778	-0.059	not sig	0.177351	0.066
fbxa-55	MSTRG.6762	NA	chrIII:933838-934379	A3SS	germline	0.09903	0.088	0.0438778	-0.095	not sig	NA	NA
flp-11	MSTRG.23211	NA	chrX:4677340-4677695	A3SS	germline	0.25763	0.037	0.0438778	-0.061	not sig	NA	NA
tag-273;Y57G11A.226	MSTRG.14851	NA	chrIV:14492282-14492381	A3SS	germline	0.995219	0.062	0.0438778	0.297	not sig	NA	NA
imp-1	MSTRG.1684	NA	chrI:8755246-8755678	A3SS	germline	0.283273	-0.022	0.0445427	-0.029	Oocyte Enriched	0.0329599	0.004
F36G9.3	MSTRG.21085	F36G9.3	chrV:15958879-15959015	A3SS	germline	0.398349	-0.085	0.0449701	0.127	not sig	1	-0.752
tsr-1	MSTRG.3585	NA	chrII:2465257-2465453	A3SS	germline	0.312954	0.174	0.0451065	-0.285	not sig	1	0.36
ZK1248.15	MSTRG.4426	NA	chrII:5837908-5838062	A3SS	germline	0.193868	0.051	0.0460334	-0.079	Oocyte Enriched	0	0.143
sel-2	MSTRG.7446	apc-11	chrIII:4597390-4597651	A3SS	germline	0.918644	-0.033	0.0463783	-0.146	Oocyte Enriched	0	0.438
mics-1	MSTRG.19506	NA	chrV:10578029-10578209	A3SS	germline	0.784901	-0.01	0.0470821	0.043	Oocyte Enriched	0.0119719	-0.035
srbc-19	MSTRG.17556	srbc-19	chrV:2165181-2165530	A3SS	germline	1	0.267	0.0476572	-0.137	not sig	NA	NA
sdz-28	MSTRG.3517	NA	chrII:2131237-2131628	A3SS	germline	1	0.007	0.047729	-0.021	not sig	NA	NA
M04C3.1	MSTRG.21910	NA	chrV:19438576-19438630	A3SS	germline	0.722431	-0.051	0.048467	-0.202	not sig	1	-0.5
rskn-1	MSTRG.1636	NA	chrI:8574432-8574581	A3SS	germline	1	-0.002	0.0484987	-0.06	Oocyte Enriched	1.86633e-08	0.165
cgt-2	MSTRG.26267	NA	chrX:17698699-17699029	A3SS	germline	0.579431	0.068	0.0499033	0.058	not sig	NA	NA
zim-1;zim-2	MSTRG.12966	NA	chrIV:10555293-10555648	A3SS	germline	1	-0.017	0.049936	-0.13	not sig	0.871985	0.049
fbxa-193	MSTRG.21630	NA	chrV:17654621-17654963	A5SS	germline	0.867235	0.011	1.05766e-08	-0.11	not sig	1	-0.036
srx-74	MSTRG.18002	srx-74	chrV:4659441-4659638	A5SS	germline	1	0.367	8.09346e-05	0.723	not sig	NA	NA
Y54G2A.36	MSTRG.9869	NA	chrIV:2900872-2901101	A5SS	germline	1	0.002	0.000166896	-0.057	not sig	1	0.134
D1014.13	MSTRG.18846	NA	chrV:8147715-8148666	A5SS	germline	0.471978	-0.104	0.000476866	-0.394	not sig	1	0.044
F19C7.3	MSTRG.10222	NA	chrIV:4597958-4598312	A5SS	germline	0.0924638	0.124	0.00108168	-0.549	not sig	NA	NA
T05A7.13	MSTRG.4044	NA	chrII:4660598-4661074	A5SS	germline	1	-0.018	0.00108168	0.243	not sig	NA	NA
T04C12.11	MSTRG.19682	NA	chrV:11059328-11059825	A5SS	germline	1	0.168	0.00212955	-0.393	not sig	NA	NA
C45G9.6	MSTRG.7570	NA	chrIII:5037368-5037753	A5SS	germline	0.372574	0.102	0.00317101	-0.137	not sig	NA	NA
F59B10.6	MSTRG.5651	NA	chrII:10523622-10523949	A5SS	germline	1	-0.012	0.00317101	-0.076	not sig	NA	NA
T19D12.1	MSTRG.4668	NA	chrII:6667678-6668362	A5SS	germline	0.299289	-0.254	0.00338101	-0.393	not sig	1	0.096
D1014.13	MSTRG.18846	NA	chrV:8147715-8147912	A5SS	germline	0.242604	-0.157	0.00347085	-0.21	not sig	1	0.012
nlp-56	MSTRG.15224	NA	chrIV:14783623-14783733	A5SS	germline	1	-0.014	0.00376677	0.085	not sig	1	0.4
lec-3	MSTRG.5521	NA	chrII:9998693-9998752	A5SS	germline	0.853346	-0.065	0.00420049	0.135	not sig	NA	NA
Y75B12B.1	MSTRG.20951	NA	chrV:15185050-15185271	A5SS	germline	1	0.002	0.00549124	0.102	not sig	1	0.012
F52H2.5;F52H2.6	MSTRG.22711	NA	chrX:2559508-2560272	A5SS	germline	1	-0.035	0.00549124	-0.154	not sig	1	-0.046
F01D5.8	MSTRG.6398	F01D5.8	chrII:14010774-14011345	A5SS	germline	1	0.012	0.00809468	0.155	not sig	1	0.307
Y37E11B.2;Y37E11B.16;Y37E11B.1;Y37E11B.11	MSTRG.9988	Y37E11B.2	chrIV:3579013-3580113	A5SS	germline	0.62445	-0.017	0.00809468	-0.097	not sig	NA	NA
W05F2.4	MSTRG.505	NA	chrI:3396665-3396787	A5SS	germline	0.238617	0.07	0.00877778	0.101	not sig	1	-0.085
Y75B8A.8	MSTRG.9138	NA	chrIII:12167002-12167930	A5SS	germline	0.685932	-0.015	0.010334	0.049	Sperm Enriched	4.4594e-05	0.021
C05D9.7	MSTRG.22414	NA	chrX:1117572-1118071	A5SS	germline	0.95813	0.005	0.010334	-0.032	not sig	1	0.003
cup-5	MSTRG.8127	NA	chrIII:7590536-7590679	A5SS	germline	1	0.018	0.0113805	0.515	not sig	0.850922	-0.057
gpcp-2	MSTRG.5034	NA	chrII:8070738-8071259	A5SS	germline	1	0.022	0.0138431	-0.529	Oocyte Enriched	0	0.835
T22D1.3	MSTRG.11959	NA	chrIV:6915603-6915902	A5SS	germline	1	-0.003	0.0138431	0.029	not sig	1	-0.004
tag-272;C34B2.11	MSTRG.2186	NA	chrI:10690607-10691406	A5SS	germline	1	-0.093	0.0138431	-0.349	not sig	NA	NA
C47E12.13	MSTRG.12811	NA	chrIV:10006037-10006892	A5SS	germline	1	0.013	0.0139563	-0.215	not sig	NA	NA
	MSTRG.19278	NA	chrV:9758161-9758626	A5SS	germline	0.961349	-0.041	0.0139649	0.234	not sig	NA	NA
etr-1	MSTRG.3016	etr-1	chrII:169551-170205	A5SS	germline	0.582386	0.032	0.0159672	-0.15	Sperm Enriched	0.000197628	-0.209
scav-3	MSTRG.9187	NA	chrIII:12456403-12456659	A5SS	germline	0.814665	-0.013	0.0162748	0.039	Oocyte Enriched	4.20017e-06	-0.101
flh-1	MSTRG.12576	NA	chrIV:9263744-9264814	A5SS	germline	1	0	0.0162748	-0.023	Sperm Enriched	0.000205605	-0.024
imp-1	MSTRG.1684	NA	chrI:8754541-8754831	A5SS	germline	0.0761202	0.082	0.0170835	0.459	Oocyte Enriched	1.96987e-10	-0.125
Y22D7AL.16	MSTRG.6927	NA	chrIII:1664035-1664638	A5SS	germline	0.193418	0.273	0.0170835	-0.316	not sig	NA	NA
pqn-87	MSTRG.6073	NA	chrII:12215829-12216191	A5SS	germline	1	0.002	0.0179925	0.235	Oocyte Enriched	1.1481e-09	-0.227
F35D2.3	MSTRG.4911	NA	chrII:7571640-7571748	A5SS	germline	0.849791	-0.03	0.0219979	-0.119	not sig	1	-0.645
B0244.10	MSTRG.7712	B0244.7	chrIII:5737206-5737446	A5SS	germline	0.799768	-0.279	0.0219979	-0.333	not sig	NA	NA
ver-4	MSTRG.24849	ver-4	chrX:10985418-10985687	A5SS	germline	1	0.19	0.0219979	0.24	not sig	NA	NA
F53H1.1	MSTRG.9609	F53H1.1	chrIV:1302634-1303339	A5SS	germline	1	0.322	0.0226954	0.04	not sig	1	-0.146
zip-5	MSTRG.20425	NA	chrV:13269162-13269487	A5SS	germline	NA	NA	0.0226954	0.012	not sig	NA	NA
sams-2;21ur-8192	MSTRG.16254	NA	chrIV:15943692-15944242	A5SS	germline	1	0.069	0.0227218	0.356	not sig	NA	NA
bath-39	MSTRG.20470	NA	chrV:13459786-13460748	A5SS	germline	1	0	0.0235811	0.037	not sig	1	-0.16
C01B10.11	MSTRG.11886	NA	chrIV:6658992-6659522	A5SS	germline	1	0	0.0244102	0.01	not sig	1	-0.136
C45B2.6	MSTRG.23566	NA	chrX:6055289-6055546	A5SS	germline	1	-0.005	0.0271553	-0.146	not sig	1	-0.009
ggtb-1;B0280.17;21ur-11608	MSTRG.8028	NA	chrIII:7134844-7136118	A5SS	germline	0.0543201	-0.011	0.0278761	0.013	Oocyte Enriched	0	-0.743
F49D11.2	MSTRG.2245	NA	chrI:10921909-10922040	A5SS	germline	0.0569915	0.017	0.0281849	0.154	not sig	NA	NA
T16G12.8	MSTRG.8774	NA	chrIII:10061507-10061701	A5SS	germline	0.331417	-0.118	0.0300335	-0.262	not sig	1	-0.271
T20B3.1	MSTRG.21277	NA	chrV:16818109-16818367	A5SS	germline	1	0.018	0.0300335	0.077	not sig	1	-0.101
che-10	MSTRG.4041	NA	chrII:4635280-4635479	A5SS	germline	1	-0.008	0.0300335	-0.078	not sig	NA	NA
F40G9.15	MSTRG.6651	NA	chrIII:180448-182662	A5SS	germline	1	0.183	0.0300335	0.186	not sig	NA	NA
vav-1	MSTRG.24445	NA	chrX:9218160-9218360	A5SS	germline	0.229646	-0.044	0.0304913	-0.058	Oocyte Enriched	0.00420875	0.066
F44E2.3	MSTRG.8448	NA	chrIII:8827779-8828128	A5SS	germline	0.302762	0.064	0.0304913	0.097	not sig	0.611968	0.01
cox-6B	MSTRG.7103	NA	chrIII:2786307-2786431	A5SS	germline	0.187089	0.208	0.0317655	0.177	Oocyte Enriched	1.52917e-07	-0.065
apx-1	MSTRG.17747	NA	chrV:3212252-3212390	A5SS	germline	0.242524	-0.046	0.0317655	0.077	Oocyte Enriched	0.0290098	-0.013
fbxc-45	MSTRG.9872	NA	chrIV:2920743-2921772	A5SS	germline	1	0.03	0.0317655	0.186	not sig	0.702978	0.02
T24B8.4	MSTRG.5299	NA	chrII:9066055-9066625	A5SS	germline	0.241085	-0.154	0.0317655	-0.1	not sig	1	-0.011
C53A5.13	MSTRG.20773	NA	chrV:14547282-14547589	A5SS	germline	1	-0.005	0.0317655	0.1	not sig	1	-0.014
unc-89	MSTRG.630	NA	chrI:4060265-4062126	A5SS	germline	1	0.065	0.0317655	0.351	not sig	1	-0.002
ivns-1	MSTRG.25208	NA	chrX:12634254-12634354	A5SS	germline	0.34633	-0.141	0.0317655	0.154	not sig	NA	NA
nhr-128	MSTRG.17571	NA	chrV:2224204-2225226	A5SS	germline	0.893037	-0.173	0.0317655	0.135	not sig	NA	NA
sra-11	MSTRG.5735	NA	chrII:10909256-10909483	A5SS	germline	1	-0.178	0.0317655	-0.227	not sig	NA	NA
K11H3.8	MSTRG.8707	NA	chrIII:9835193-9835263	A5SS	germline	1	0.004	0.0324327	0.048	Sperm Enriched	0.00771173	0.018
sek-3	MSTRG.23281	NA	chrX:5019276-5019450	A5SS	germline	0.638911	0.06	0.0324327	0.113	Oocyte Enriched	0.00826362	-0.065
	MSTRG.20876	NA	chrV:14962553-14962623	A5SS	germline	1	-0.105	0.0354252	-0.55	not sig	NA	NA
parg-1	MSTRG.12463	NA	chrIV:8746381-8747418	A5SS	germline	0.193418	0.073	0.036425	0.038	Oocyte Enriched	0	-0.039
T01G1.4	MSTRG.13183	NA	chrIV:11361295-11361662	A5SS	germline	1	-0.009	0.036425	0.027	not sig	0.104501	0.017
micu-1	MSTRG.13700	NA	chrIV:13298491-13298615	A5SS	germline	0.597571	-0.032	0.036425	-0.078	not sig	0.656336	-0.028
pyk-1	MSTRG.1789	NA	chrI:9168431-9168489	A5SS	germline	0.981029	-0.007	0.036425	-0.022	not sig	1	0.004
B0252.3	MSTRG.4740	NA	chrII:6904811-6905338	A5SS	germline	1	-0.002	0.036425	0.048	not sig	1	0.037
F40G9.14	MSTRG.6650	NA	chrIII:176701-176755	A5SS	germline	0.749315	-0.188	0.036425	-0.494	not sig	NA	NA
Y102A5C.35	MSTRG.21308	NA	chrV:16925649-16925905	A5SS	germline	1	-1	0.036425	-0.307	not sig	NA	NA
mans-4	MSTRG.12528	NA	chrIV:9078455-9078928	A5SS	germline	1	-0.025	0.036425	-0.065	not sig	NA	NA
C52E2.5	MSTRG.3442	NA	chrII:1842265-1842942	A5SS	germline	1	-0.024	0.036425	-0.169	not sig	NA	NA
Y102A5C.35	MSTRG.21308	NA	chrV:16925580-16925905	A5SS	germline	NA	NA	0.036425	-0.237	not sig	NA	NA
F32E10.5;cec-4	MSTRG.12180	NA	chrIV:7575208-7575929	A5SS	germline	1	-0.002	0.0374861	-0.035	not sig	1	0.001
R04A9.7	MSTRG.22280	NA	chrX:392369-393393	A5SS	germline	0.799545	-0.356	0.0374861	-0.167	not sig	NA	NA
B0495.9	MSTRG.4946	NA	chrII:7708374-7708509	A5SS	germline	0.173189	-0.021	0.0377043	0.026	not sig	1	-0.006
	MSTRG.8099	NA	chrIII:7469283-7469491	A5SS	germline	1	0.056	0.0377906	-0.17	not sig	1	-0.055
Y48G1BM.6	MSTRG.38	Y48G1BM.6	chrI:234028-234997	A5SS	germline	1	0.078	0.0381414	-0.268	not sig	1	-0.137
rab-30	MSTRG.8877	NA	chrIII:10563405-10563474	A5SS	germline	0.329581	-0.017	0.0390009	0.023	not sig	1	-0.017
let-805	MSTRG.7083	NA	chrIII:2663152-2663242	A5SS	germline	0.529507	0.342	0.0390238	-0.28	not sig	NA	NA
dct-12	MSTRG.6120	Y57A10C.8	chrII:12431506-12431587	A5SS	germline	1	0.049	0.0398157	-0.178	not sig	NA	NA
abu-8;C03A7.13	MSTRG.18112	abu-8	chrV:5190921-5191056	A5SS	germline	1	0.072	0.0398157	0.144	not sig	NA	NA
tiar-1	MSTRG.4374	NA	chrII:5714292-5714590	A5SS	germline	0.169599	-0.037	0.0452759	-0.031	not sig	1	0
Y48G9A.11	MSTRG.6999	Y48G9A.11	chrIII:2116200-2116348	A5SS	germline	0.588313	0.028	0.0482995	-0.069	not sig	1	-0.032
T21C9.6	MSTRG.19509	NA	chrV:10583237-10583307	A5SS	germline	1	0.01	0.0482995	0.082	not sig	NA	NA
rsef-1	MSTRG.22817	NA	chrX:3058526-3058641	A5SS	germline	0.599693	-0.223	0.0488317	0.214	not sig	NA	NA
C55A6.10	MSTRG.19861	NA	chrV:11505661-11505780	A5SS	germline	0.395645	-0.064	0.0496925	-0.086	not sig	0.374045	0.11
Y54G2A.36	MSTRG.9869	NA	chrIV:2900872-2901365	RI	germline	0.532852	-0.03	4.64295e-12	-0.185	not sig	0.0837223	-0.043
T05A7.13	MSTRG.4044	NA	chrII:4660335-4660738	RI	germline	0.952035	0.068	1.12419e-06	0.427	not sig	NA	NA
bud-31	MSTRG.8669	NA	chrIII:9696122-9696517	RI	germline	0.326335	-0.259	3.55159e-06	0.67	not sig	NA	NA
trt-1	MSTRG.1686	NA	chrI:8770107-8770264	RI	germline	1	-0.005	6.24253e-06	0.115	Oocyte Enriched	0.0456636	-0.024
zip-8	MSTRG.7875	NA	chrIII:6480234-6480755	RI	germline	0.337852	0.046	2.55089e-05	0.231	not sig	1	-0.2
Y106G6H.6	MSTRG.2117	NA	chrI:10445527-10445788	RI	germline	0.801643	-0.025	2.65553e-05	0.16	not sig	0.745841	-0.009
clec-88	MSTRG.4574	NA	chrII:6365981-6366989	RI	germline	0.935921	0.003	3.93766e-05	-0.03	Oocyte Enriched	9.53461e-09	0.056
str-7	MSTRG.21134	str-7	chrV:16098366-16098924	RI	germline	0.64927	0.138	4.89459e-05	0.496	not sig	NA	NA
C05E4.15	MSTRG.17327	NA	chrV:760968-761579	RI	germline	0.423712	-0.209	7.81311e-05	0.647	not sig	NA	NA
B0286.1;fkh-6	MSTRG.4000	B0286.1	chrII:4379615-4379877	RI	germline	1	-0.003	0.000140369	0.042	not sig	1	0.38
T22C1.1;glb-26;T22C1.3	MSTRG.1501	NA	chrI:7937505-7938651	RI	germline	1	0.007	0.000140369	-0.143	not sig	1	0.001
T05A7.13	MSTRG.4044	NA	chrII:4660883-4661481	RI	germline	0.959373	0.025	0.000140369	0.299	not sig	NA	NA
F26D2.3	MSTRG.21208	NA	chrV:16408748-16409365	RI	germline	1	-0.333	0.000140369	0.667	not sig	NA	NA
clec-88;ctsa-1	MSTRG.4574	NA	chrII:6365981-6367333	RI	germline	0.983383	0.01	0.000217795	-0.199	Oocyte Enriched	0.040828	0.034
F36F2.7	MSTRG.1745	NA	chrI:8999986-9000527	RI	germline	0.441567	0.221	0.000228669	0.371	not sig	NA	NA
F19C7.3	MSTRG.10222	NA	chrIV:4597958-4598761	RI	germline	0.323379	0.122	0.00024985	-0.361	not sig	1	-0.991
pqn-70	MSTRG.19771	NA	chrV:11226877-11228477	RI	germline	1	0.003	0.00028433	0.025	Oocyte Enriched	0	-0.125
nmgp-1;F13H8.12	MSTRG.4539	NA	chrII:6262353-6262776	RI	germline	1	-0.333	0.00028433	-0.376	not sig	1	-0.031
Y95B8A.6;him-19	MSTRG.129	NA	chrI:889673-890349	RI	germline	0.12401	0.095	0.00029015	0.184	not sig	0.488002	0.02
W04B5.3	MSTRG.7049	W04B5.3	chrIII:2422450-2423095	RI	germline	0.479754	-0.056	0.000299221	0.143	not sig	1	-0.039
M162.12	MSTRG.21994	NA	chrV:19769876-19770708	RI	germline	0.729039	-0.032	0.000323151	-0.395	not sig	1	-0.09
T05A7.13	MSTRG.4044	NA	chrII:4660335-4661074	RI	germline	1	-0.003	0.000481076	0.216	not sig	NA	NA
ZC196.3	MSTRG.19001	ZC196.3	chrV:8737476-8737632	RI	germline	0.968425	-0.001	0.000486717	-0.349	not sig	NA	NA
tos-1	MSTRG.19157	NA	chrV:9343675-9344218	RI	germline	1	-0.001	0.000497216	0.048	Sperm Enriched	1.07178e-12	0.267
Y73B6BL.29;sqd-1	MSTRG.11680	NA	chrIV:6323267-6324285	RI	germline	NA	NA	0.000552603	0.197	not sig	NA	NA
bath-4	MSTRG.3461	NA	chrII:1917398-1917958	RI	germline	1	0.009	0.000761145	-0.094	not sig	1	-0.006
F25H2.4	MSTRG.2148	NA	chrI:10551431-10552101	RI	germline	1	-0.204	0.000763177	-0.614	Sperm Enriched	0.0361386	-0.151
F25E5.5;F25E5.4	MSTRG.18675	NA	chrV:7448697-7449512	RI	germline	1	0.038	0.000872856	-0.237	not sig	NA	NA
unc-43	MSTRG.12918	NA	chrIV:10338485-10338776	RI	germline	0.742287	0.289	0.00121788	-0.405	not sig	1	0.355
sws-1	MSTRG.21795	NA	chrV:18980720-18980927	RI	germline	1	0.008	0.0013602	0.117	Sperm Enriched	0.0181111	0.073
T08D2.5;T08D2.6	MSTRG.22247	NA	chrX:178806-179882	RI	germline	0.93914	-0.234	0.00147309	-0.316	not sig	NA	NA
fbxa-9;fbxa-48	MSTRG.7028	NA	chrIII:2267875-2268300	RI	germline	1	-0.018	0.00161534	0.205	not sig	NA	NA
K04A8.2	MSTRG.18466	K04A8.2	chrV:6562209-6562892	RI	germline	1	0.258	0.00171252	-0.425	not sig	NA	NA
rig-6	MSTRG.4091	NA	chrII:4801650-4803470	RI	germline	0.997193	-0.032	0.00184169	0.081	not sig	1	-0.137
memi-2	MSTRG.13721	NA	chrIV:13399793-13400512	RI	germline	1	-0.003	0.00187352	-0.078	Sperm Enriched	0.0011776	-0.054
F01F1.14	MSTRG.7747	F01F1.14	chrIII:5882689-5883070	RI	germline	0.715819	0.034	0.00215518	-0.174	not sig	1	-0.066
C27A12.2	MSTRG.1060	NA	chrI:6042529-6042727	RI	germline	1	0.006	0.0024434	0.042	not sig	1	0.005
srz-24	MSTRG.10392	NA	chrIV:4980117-4980663	RI	germline	1	0.28	0.00264734	-0.644	not sig	NA	NA
	MSTRG.3778	NA	chrII:3316166-3318013	RI	germline	0.410409	-0.123	0.0027622	0.359	not sig	NA	NA
rib-1;F12F6.1	MSTRG.13245	NA	chrIV:11583380-11585491	RI	germline	0.772156	-0.171	0.00296302	-0.501	Sperm Enriched	3.14294e-10	-0.281
T22C1.1;glb-26;T22C1.3	MSTRG.1501	NA	chrI:7937778-7938651	RI	germline	0.337852	-0.065	0.004119	-0.167	not sig	1	0.002
C32D5.8;C32D5.1	MSTRG.4569	C32D5.1	chrII:6344927-6345519	RI	germline	0.432945	-0.02	0.00414022	0.052	not sig	1	-0.429
C54G4.7;dod-18	MSTRG.1523	NA	chrI:8020619-8020901	RI	germline	0.846373	-0.006	0.00423839	0.03	Oocyte Enriched	3.64151e-05	-0.052
B0303.11	MSTRG.8417	B0303.11	chrIII:8706836-8707627	RI	germline	0.924045	0	0.00437788	-0.151	not sig	1	-0.562
M162.9	MSTRG.21995	NA	chrV:19773647-19774312	RI	germline	1	-0.004	0.00484838	0.075	not sig	1	0.019
ZK470.14	MSTRG.23072	NA	chrX:4169535-4169805	RI	germline	0.579943	-0.047	0.00490866	-0.101	not sig	NA	NA
F11A10.6;mig-32	MSTRG.13399	NA	chrIV:12088910-12089649	RI	germline	0.958357	0.09	0.0057946	-0.229	Oocyte Enriched	0	0.667
F35C8.9	MSTRG.23359	NA	chrX:5373108-5374034	RI	germline	0.385862	-0.15	0.00585243	0.224	not sig	NA	NA
vps-25	MSTRG.2582	NA	chrI:12733286-12734096	RI	germline	0.590459	0.005	0.00655945	0.014	Oocyte Enriched	5.24015e-09	-0.014
linc-103	MSTRG.23629	NA	chrX:6256777-6257700	RI	germline	0.566848	-0.142	0.00682792	0.22	not sig	NA	NA
B0001.2	MSTRG.13415	NA	chrIV:12146892-12147254	RI	germline	0.163408	-0.031	0.00690214	0.07	Sperm Enriched	5.48169e-05	0.037
bre-5	MSTRG.13387	bre-5	chrIV:12050973-12051428	RI	germline	0.775134	0.042	0.00690214	0.129	Sperm Enriched	0.0153127	0.251
F18A11.5;max-2	MSTRG.6236	NA	chrII:13012459-13015463	RI	germline	1	-0.055	0.00744845	0.356	not sig	1	0.196
pals-37	MSTRG.20183	NA	chrV:12441102-12441285	RI	germline	1	0.147	0.00744845	-0.214	not sig	NA	NA
lev-1	MSTRG.13674	lev-1	chrIV:13176141-13176621	RI	germline	0.688605	0.087	0.00783498	-0.152	not sig	NA	NA
slc-25A26	MSTRG.12500	NA	chrIV:8932158-8932796	RI	germline	0.46476	0.015	0.00819914	0.04	not sig	1	-0.006
F56D6.17	MSTRG.10053	NA	chrIV:3895944-3896578	RI	germline	1	0.48	0.0086318	-0.375	not sig	NA	NA
fbxa-172	MSTRG.21598	fbxa-176	chrV:17560736-17561373	RI	germline	0.345839	0.206	0.00878264	-0.218	not sig	NA	NA
Y50D7A.3	MSTRG.6655	NA	chrIII:256096-257654	RI	germline	1	0	0.00954134	0.067	not sig	0.161514	-0.011
lido-16	MSTRG.4607	NA	chrII:6483952-6484613	RI	germline	0.535613	-0.172	0.00997185	0.385	not sig	1	-0.232
etr-1	MSTRG.3016	etr-1	chrII:169551-170732	RI	germline	0.518743	0.027	0.011206	-0.148	Sperm Enriched	0.000624051	-0.228
grl-3;21ur-12485	MSTRG.19825	NA	chrV:11412352-11412859	RI	germline	0.0897759	-0.393	0.011206	0.443	not sig	1	-0.189
Y65B4BL.7	MSTRG.73	NA	chrI:509261-509423	RI	germline	1	-0.015	0.011206	-0.142	not sig	1	-0.166
him-3	MSTRG.11977	him-3	chrIV:6977769-6978202	RI	germline	1	0.005	0.011206	-0.02	not sig	1	-0.001
F53F4.12;F53F4.14	MSTRG.20518	NA	chrV:13627029-13627737	RI	germline	NA	NA	0.011206	-0.525	not sig	NA	NA
miz-1	MSTRG.13030	miz-1	chrIV:10823941-10824792	RI	germline	0.177878	-0.103	0.0113416	-0.116	not sig	0.251819	0.061
duxl-1	MSTRG.3389	NA	chrII:1663914-1664169	RI	germline	0.439838	-0.086	0.0113416	-0.095	not sig	1	0.035
T20G5.12	MSTRG.8808	NA	chrIII:10201950-10202195	RI	germline	0.399612	-0.507	0.0113416	0.216	not sig	NA	NA
T05B4.13;T05B4.16	MSTRG.17918	NA	chrV:4127126-4127537	RI	germline	0.531332	0.027	0.0113416	0.418	not sig	NA	NA
har-2	MSTRG.2013	NA	chrI:9956431-9956671	RI	germline	1	-0.002	0.0116985	0.044	not sig	1	0.007
snr-4;C52E4.14	MSTRG.20008	mif-2	chrV:11979688-11979970	RI	germline	0.991649	0.011	0.0121872	0.061	Oocyte Enriched	9.10432e-06	-0.03
fbxl-1	MSTRG.8278	NA	chrIII:8231746-8232650	RI	germline	0.32046	0.094	0.0123836	0.171	not sig	1	-0.007
rev-1	MSTRG.4996	NA	chrII:7902695-7903197	RI	germline	0.16716	-0.076	0.0124528	0.069	not sig	1	0.035
K01A2.4;mps-2	MSTRG.3044	NA	chrII:310324-311693	RI	germline	0.973152	0.061	0.0128736	0.057	not sig	1	-0.384
cdc-25.1	MSTRG.1182	cdc-25.1	chrI:6470293-6470606	RI	germline	0.923709	-0.028	0.013653	-0.092	not sig	1	-0.005
H10E21.1	MSTRG.6618	H10E21.1	chrIII:16520-16938	RI	germline	1	0.005	0.013653	0.014	not sig	1	-0.019
srh-39	MSTRG.4960	B0228.9	chrII:7764438-7764896	RI	germline	1	0.565	0.013653	-0.464	not sig	NA	NA
fbxa-219	MSTRG.7031	fbxa-219	chrIII:2292345-2292958	RI	germline	1	-0.012	0.0146711	0.126	not sig	NA	NA
srh-76	WBGene00005297	srh-76	chrV:5834412-5834919	RI	germline	1	-1	0.0146711	-0.317	not sig	NA	NA
ced-4;C35D10.8	MSTRG.7525	NA	chrIII:4854729-4855574	RI	germline	1	-0.023	0.0164092	-0.237	Oocyte Enriched	0	0.735
K08E4.3	MSTRG.13390	NA	chrIV:12059499-12059951	RI	germline	0.238173	0.123	0.0164092	0.186	not sig	1	0.014
dao-5	MSTRG.2073	dao-5	chrI:10187978-10190132	RI	germline	0.5976	0.07	0.0164092	-0.144	not sig	1	-0.008
C05D9.7	MSTRG.22414	NA	chrX:1117191-1118071	RI	germline	0.24314	0.018	0.0166866	-0.031	not sig	1	0.003
dyla-1	MSTRG.26134	NA	chrX:16840071-16841730	RI	germline	0.952035	0.095	0.0166866	0.283	not sig	NA	NA
T16H12.3	MSTRG.8779	NA	chrIII:10081764-10082101	RI	germline	0.135592	0.076	0.0168427	-0.136	not sig	1	0.006
C39E9.8	MSTRG.13651	C39E9.8	chrIV:13082316-13082781	RI	germline	1	0.002	0.0169422	-0.019	not sig	1	0.024
W08E3.4	MSTRG.2688	NA	chrI:13338481-13338796	RI	germline	0.111374	-0.11	0.017162	0.493	not sig	1	0.348
T19D12.1	MSTRG.4668	NA	chrII:6667678-6669006	RI	germline	0.380318	-0.233	0.017162	-0.398	not sig	1	0.144
par-4	MSTRG.21373	NA	chrV:18106079-18107623	RI	germline	0.674464	0.059	0.0194491	-0.294	not sig	NA	NA
nhr-128;nhr-103	MSTRG.17571	NA	chrV:2224204-2225536	RI	germline	0.920605	-0.165	0.0194491	0.176	not sig	NA	NA
hir-1	MSTRG.18177	NA	chrV:5527960-5528636	RI	germline	1	0.137	0.0195982	0.223	not sig	1	-1
F01D4.5	MSTRG.12952	NA	chrIV:10483307-10483844	RI	germline	0.124575	0.105	0.0206354	-0.099	not sig	1	-0.083
Y17G9B.4	MSTRG.10252	Y17G9B.4	chrIV:4752118-4752518	RI	germline	1	0.017	0.0211424	-0.115	Oocyte Enriched	1.90094e-06	0.243
F14D7.4	MSTRG.20694	NA	chrV:14297524-14297861	RI	germline	0.440424	-0.065	0.0216203	-0.305	not sig	NA	NA
rsp-6	MSTRG.12231	NA	chrIV:7790244-7790944	RI	germline	0.0954211	0.011	0.0227995	0.017	Oocyte Enriched	2.48066e-10	-0.013
ZK1307.1	MSTRG.5445	NA	chrII:9655125-9655883	RI	germline	0.461954	-0.053	0.0227995	-0.139	not sig	0.0617367	0.267
syx-6	MSTRG.22840	NA	chrX:3164849-3165231	RI	germline	0.657935	0.091	0.0227995	-0.202	not sig	NA	NA
T04C12.1;T04C12.11	MSTRG.19682	NA	chrV:11059085-11059825	RI	germline	1	-0.034	0.0227995	-0.333	not sig	NA	NA
C16C8.21;C16C8.14	MSTRG.3820	NA	chrII:3448671-3449705	RI	germline	0.755331	0.296	0.0229029	-0.398	not sig	1	-0.052
pld-1;C04G6.14	MSTRG.4174	NA	chrII:5091068-5091413	RI	germline	1	0.005	0.0230654	-0.048	not sig	0.272181	-0.012
Y32H12A.8	MSTRG.7639	NA	chrIII:5394995-5396189	RI	germline	0.113221	0.227	0.0236578	0.19	Oocyte Enriched	0	-0.677
F58F9.1	MSTRG.11623	F58F9.1	chrIV:6251824-6252338	RI	germline	0.156862	-0.077	0.0236578	-0.077	not sig	NA	NA
prx-3	MSTRG.23583	NA	chrX:6112861-6113165	RI	germline	1	0	0.0236578	-0.157	not sig	NA	NA
F47E1.4	MSTRG.24390	NA	chrX:9064583-9065145	RI	germline	1	0.027	0.0236578	0.108	not sig	NA	NA
Y57G11C.36	MSTRG.15220	NA	chrIV:14773111-14773597	RI	germline	1	-0.015	0.028552	-0.106	not sig	0.691747	-0.026
F56F4.8	MSTRG.1098	F56F4.8	chrI:6149434-6150502	RI	germline	0.615141	0.032	0.0287112	-0.113	not sig	NA	NA
fbxb-25	MSTRG.3397	fbxb-25	chrII:1684180-1685091	RI	germline	0.802593	0.308	0.0287112	-0.389	not sig	NA	NA
Y119C1A.1	MSTRG.744	NA	chrI:4643968-4644575	RI	germline	NA	NA	0.0287902	0.134	not sig	1	-0.089
ZC317.7	MSTRG.18164	NA	chrV:5469392-5469804	RI	germline	0.705096	-0.125	0.0292758	-0.316	Oocyte Enriched	0.000840647	0.133
hip-1	MSTRG.9358	NA	chrIII:13622119-13622501	RI	germline	0.249549	0.081	0.029422	0.108	Sperm Enriched	0	0.256
ntl-11	MSTRG.15875	NA	chrIV:15470750-15471559	RI	germline	0.720046	0.023	0.0300753	-0.073	Sperm Enriched	0.0178737	-0.021
T28A8.5	MSTRG.9339	NA	chrIII:13502189-13502411	RI	germline	0.838349	-0.025	0.0300753	0.073	not sig	1	-0.008
str-262	MSTRG.17324	str-262	chrV:752385-752779	RI	germline	0.879454	0.081	0.0302767	-0.219	not sig	NA	NA
R09B3.6	MSTRG.2427	NA	chrI:11906574-11907567	RI	germline	0.423797	0.084	0.0369119	-0.222	not sig	1	-0.021
ZK673.1	MSTRG.5627	NA	chrII:10444357-10445233	RI	germline	0.105102	0.025	0.0378887	-0.02	not sig	1	0.004
tos-1	MSTRG.19157	NA	chrV:9342203-9343416	RI	germline	0.719756	-0.097	0.0378887	0.068	not sig	1	-0.015
F44A6.5	MSTRG.24675	NA	chrX:10218504-10219543	RI	germline	0.229519	0.166	0.0379613	-0.128	not sig	NA	NA
pap-1;Y32F6A.5	MSTRG.19462	set-22	chrV:10445575-10447795	RI	germline	0.260471	-0.032	0.0382681	0.315	not sig	1	0.06
R11G10.3	MSTRG.20484	NA	chrV:13523503-13524018	RI	germline	1	0.004	0.0396707	0.035	not sig	NA	NA
nmtn-1	MSTRG.1184	nmtn-1	chrI:6477209-6477526	RI	germline	0.283533	-0.045	0.0447057	0.077	not sig	NA	NA
acr-3	MSTRG.23748	NA	chrX:6712340-6712605	RI	germline	0.820999	-0.139	0.0447057	0.382	not sig	NA	NA
gpcp-2	MSTRG.5034	NA	chrII:8070534-8071259	RI	germline	0.106405	0.209	0.0467629	0.361	Sperm Enriched	0	0.869
vhp-1	MSTRG.4253	NA	chrII:5339074-5340284	RI	germline	1	0.007	0.0470927	0.069	not sig	1	0.025
ttr-52	MSTRG.9320	NA	chrIII:13404983-13405784	RI	germline	0.483809	0.021	0.0470927	0.044	not sig	NA	NA
let-383;T21G5.2	MSTRG.1287	NA	chrI:6870229-6871442	RI	germline	1	0.86	0.0470927	0.333	not sig	NA	NA
let-363	MSTRG.872	NA	chrI:5259295-5259858	RI	germline	1	0.008	0.0476646	0.091	not sig	NA	NA
epg-8	MSTRG.2010	epg-8	chrI:9933861-9933997	SE	germline	0.523011	0.068	2.70827e-09	0.168	not sig	1	-0.024
B0244.4	MSTRG.7716	NA	chrIII:5749091-5749252	SE	germline	1	-0.342	2.70827e-09	0.843	not sig	NA	NA
Y43F8B.3	MSTRG.21924	Y43F8B.3	chrV:19515204-19515543	SE	germline	NA	NA	3.28962e-06	-0.52	not sig	NA	NA
Y38H6C.9	MSTRG.22135	NA	chrV:20521762-20521826	SE	germline	0.488698	-0.22	1.7878e-05	-0.558	not sig	1	0.667
Y106G6H.16	MSTRG.2124	NA	chrI:10475217-10475301	SE	germline	1	-0.007	5.64794e-05	0.069	not sig	0.385719	-0.02
camt-1	MSTRG.4017	NA	chrII:4492086-4492120	SE	germline	1	0.016	7.9573e-05	0.106	not sig	1	0.009
Y34F4.5;E_BE45912.2	MSTRG.6786	NA	chrIII:1030184-1030415	SE	germline	1	-0.008	7.9573e-05	0.11	not sig	1	-0.01
Y34F4.5;E_BE45912.2	MSTRG.6786	NA	chrIII:1030184-1030432	SE	germline	1	-0.009	7.9573e-05	0.117	not sig	1	-0.011
Y34F4.5;E_BE45912.2	MSTRG.6786	NA	chrIII:1030184-1030469	SE	germline	1	-0.008	7.9573e-05	0.111	not sig	1	-0.011
Y34F4.5;E_BE45912.2	MSTRG.6786	NA	chrIII:1030184-1030485	SE	germline	1	-0.011	7.9573e-05	0.131	not sig	1	-0.011
srv-13	MSTRG.11714	NA	chrIV:6407430-6407736	SE	germline	1	0.199	7.9573e-05	-0.689	not sig	NA	NA
T05A7.13	MSTRG.4044	NA	chrII:4660598-4660738	SE	germline	1	-0.016	7.9573e-05	0.42	not sig	NA	NA
F53F10.8	MSTRG.587	NA	chrI:3828490-3828689	SE	germline	1	0	0.000444309	0.05	not sig	1	0.007
Y38H6C.9	MSTRG.22135	NA	chrV:20521381-20521467	SE	germline	1	0.045	0.000453076	-0.269	not sig	NA	NA
cle-1	MSTRG.1672	NA	chrI:8709762-8709831	SE	germline	0.205376	0.079	0.000813831	0.116	not sig	1	0
ZK616.1	MSTRG.10757	NA	chrIV:5403837-5403978	SE	germline	0.268252	-0.061	0.000873004	-0.179	not sig	NA	NA
cpna-2	MSTRG.4953	cpna-2	chrII:7730505-7730769	SE	germline	1	-0.049	0.000873004	-0.205	not sig	NA	NA
srw-145	MSTRG.20600	NA	chrV:13939076-13939214	SE	germline	0.816238	-0.066	0.000886682	-0.227	not sig	NA	NA
C46C11.4	MSTRG.23205	NA	chrX:4644602-4644700	SE	germline	1	0.045	0.000955488	-0.264	not sig	NA	NA
sdz-29	MSTRG.3516	NA	chrII:2124900-2128710	SE	germline	0.946955	-0.023	0.000976801	0.183	not sig	NA	NA
fars-1	MSTRG.1115	NA	chrI:6214312-6214423	SE	germline	1	0.02	0.00101639	0.077	not sig	1	-0.001
F11C1.1	MSTRG.25276	NA	chrX:12989018-12989127	SE	germline	0.596516	-0.028	0.00101639	-0.107	not sig	NA	NA
F31C3.6	MSTRG.2961	F31C3.6	chrI:15057763-15057833	SE	germline	1	-0.002	0.00101639	-0.102	not sig	NA	NA
T05A8.2	MSTRG.3639	T05A8.1	chrII:2710109-2710268	SE	germline	1	0.114	0.00108473	0.667	not sig	NA	NA
mrp-1	MSTRG.22313	NA	chrX:580888-581044	SE	germline	1	0.008	0.00142812	-0.179	not sig	1	0.091
pvf-1	MSTRG.6957	NA	chrIII:1823974-1824166	SE	germline	0.770401	0.018	0.00147847	0.086	not sig	1	0.06
pvf-1	MSTRG.6957	NA	chrIII:1823974-1824173	SE	germline	0.783704	0.018	0.00147847	0.086	not sig	1	0.057
pvf-1	MSTRG.6957	NA	chrIII:1823974-1824207	SE	germline	0.794605	0.019	0.00147847	0.094	not sig	1	0.061
pvf-1	MSTRG.6957	NA	chrIII:1823974-1824204	SE	germline	0.798615	0.019	0.00147847	0.094	not sig	1	0.061
lgc-31	MSTRG.21013	NA	chrV:15513464-15513641	SE	germline	1	-0.027	0.00147847	0.22	not sig	NA	NA
srd-3	MSTRG.3005	srd-3	chrII:128258-128388	SE	germline	1	0.063	0.00147847	-0.231	not sig	NA	NA
bli-4;K04F10.8;K04F10.9	MSTRG.1151	NA	chrI:6346972-6354044	SE	germline	1	-0.085	0.00184441	-0.213	not sig	1	-0.109
bli-4;K04F10.9	MSTRG.1151	NA	chrI:6349593-6354044	SE	germline	1	-0.069	0.00213329	-0.207	not sig	1	-0.111
bli-4;K04F10.8;K04F10.9	MSTRG.1151	NA	chrI:6348291-6354044	SE	germline	1	-0.07	0.00215093	-0.202	not sig	1	-0.083
fbxa-34	MSTRG.6843	NA	chrIII:1284061-1284158	SE	germline	1	-0.146	0.00252591	-0.382	not sig	NA	NA
srd-35	MSTRG.20338	NA	chrV:12965337-12965531	SE	germline	1	-0.063	0.00254472	0.433	not sig	NA	NA
nstp-1	MSTRG.12509	nstp-1	chrIV:8985399-8985502	SE	germline	1	-0.006	0.00277751	-0.133	Sperm Enriched	0.0053898	-0.144
F42A10.9	MSTRG.7809	NA	chrIII:6170899-6171027	SE	germline	1	-0.007	0.00277751	0.04	not sig	1	0.053
R01H2.7	MSTRG.8003	NA	chrIII:7036207-7036364	SE	germline	0.344478	-0.065	0.00277751	-0.151	not sig	NA	NA
col-99	MSTRG.9412	NA	chrIV:141714-141750	SE	germline	1	0.365	0.00449749	-0.493	not sig	1	-0.144
droe-8	MSTRG.18999	droe-8	chrV:8728483-8728598	SE	germline	1	0.215	0.0047159	0.416	not sig	NA	NA
R10E8.7;R10E8.3	MSTRG.21411	NA	chrV:18233784-18235403	SE	germline	0.260717	0.179	0.00502374	0.262	not sig	NA	NA
clec-146	MSTRG.6311	NA	chrII:13592947-13593409	SE	germline	0.219815	-0.008	0.00517649	0.013	not sig	1	-0.167
fbxa-50	MSTRG.6843	NA	chrIII:1287864-1288090	SE	germline	1	-0.09	0.00517696	-0.236	not sig	NA	NA
C40A11.6	MSTRG.3521	NA	chrII:2145359-2145410	SE	germline	0.473079	-0.04	0.00552846	-0.076	not sig	NA	NA
C53C7.5	MSTRG.25284	NA	chrX:13045601-13045800	SE	germline	1	0.002	0.00552846	0.024	not sig	NA	NA
F08F8.10	MSTRG.8076	NA	chrIII:7354907-7355134	SE	germline	0.508804	0.037	0.00556258	0.122	not sig	1	0.005
tmem-135	MSTRG.23210	tmem-135	chrX:4675855-4676023	SE	germline	1	0.002	0.00556748	0.052	not sig	NA	NA
R10E8.7;R10E8.3	MSTRG.21411	NA	chrV:18234568-18235403	SE	germline	0.286417	0.188	0.00583615	0.254	not sig	NA	NA
nhr-204	MSTRG.17249	NA	chrV:256870-257028	SE	germline	1	0.092	0.00598545	-0.14	not sig	1	0.058
Y37E11B.1	MSTRG.9988	Y37E11B.2	chrIV:3579992-3580113	SE	germline	1	-0.015	0.00631955	-0.079	not sig	NA	NA
F35A5.8	MSTRG.22980	NA	chrX:3801747-3801786	SE	germline	1	0.069	0.0065208	0.201	not sig	1	-0.009
Y105C5A.13	MSTRG.16014	NA	chrIV:15643522-15643666	SE	germline	0.11692	0.275	0.00658766	0.525	not sig	NA	NA
F54G2.1;C09B7.6	MSTRG.22722	NA	chrX:2661756-2662134	SE	germline	1	-0.06	0.0070009	0.187	not sig	NA	NA
gyg-1	MSTRG.22923	NA	chrX:3539895-3539952	SE	germline	1	-0.008	0.00734761	0.1	not sig	1	0.296
Y37E11B.1	MSTRG.9988	Y37E11B.2	chrIV:3579991-3580113	SE	germline	1	-0.012	0.00797909	-0.075	not sig	NA	NA
ifb-2	MSTRG.4389	NA	chrII:5752816-5752867	SE	germline	1	-0.01	0.0093211	0.091	not sig	1	-0.155
	MSTRG.23557	NA	chrX:6040292-6040351	SE	germline	1	-0.125	0.00938064	0.32	not sig	NA	NA
twk-28	MSTRG.23100	NA	chrX:4279024-4279315	SE	germline	0.914608	0.268	0.0109441	0.3	not sig	NA	NA
mtm-3	MSTRG.7267	NA	chrIII:3791279-3791614	SE	germline	1	0.018	0.0119108	-0.074	Oocyte Enriched	0	0.309
kvs-4	MSTRG.8954	NA	chrIII:11023650-11023676	SE	germline	1	0.19	0.0126421	0.489	not sig	NA	NA
rbf-1	MSTRG.7912	NA	chrIII:6701098-6701350	SE	germline	0.163951	0.21	0.0136186	0.21	not sig	NA	NA
T24B8.4	MSTRG.5299	NA	chrII:9065183-9065405	SE	germline	1	-0.026	0.014135	-0.148	not sig	1	-0.203
rgef-1	MSTRG.19222	NA	chrV:9557589-9557718	SE	germline	1	0.003	0.0144114	0.101	not sig	NA	NA
Y71A12B.13	MSTRG.2790	NA	chrI:13962916-13962990	SE	germline	1	0.311	0.015063	-0.342	not sig	1	0.5
clik-3	MSTRG.514	NA	chrI:3423208-3423355	SE	germline	1	0.015	0.015063	0.171	not sig	1	0.002
ampd-1	MSTRG.4219	NA	chrII:5205039-5205075	SE	germline	1	0.015	0.015063	0.04	not sig	1	-0.003
slc-17.4	MSTRG.17109	NA	chrIV:17288948-17289039	SE	germline	1	0.009	0.015063	-0.082	not sig	NA	NA
col-99	MSTRG.9412	NA	chrIV:142259-142295	SE	germline	NA	NA	0.0166026	-0.427	not sig	NA	NA
cbn-1	MSTRG.3049	NA	chrII:328874-329070	SE	germline	0.887266	-0.005	0.0171457	0.212	not sig	NA	NA
lgx-1	MSTRG.23401	lgx-1	chrX:5536779-5536932	SE	germline	NA	NA	0.0171457	-0.205	not sig	NA	NA
F08F1.4	MSTRG.24213	F08F1.4	chrX:8413490-8413585	SE	germline	0.96427	0.005	0.0175124	0.013	not sig	NA	NA
ehbp-1	MSTRG.19221	NA	chrV:9554618-9554738	SE	germline	0.469654	-0.033	0.0178238	-0.07	not sig	1	-0.005
unc-49	MSTRG.8868	unc-49	chrIII:10527387-10527466	SE	germline	1	0.113	0.0185369	-0.246	not sig	NA	NA
B0250.12	MSTRG.22118	NA	chrV:20466792-20466905	SE	germline	1	0.066	0.0185369	-0.48	not sig	NA	NA
unc-82	MSTRG.12127	NA	chrIV:7438526-7438598	SE	germline	1	0.072	0.0193342	0.32	not sig	1	0.247
rgef-1	MSTRG.19222	NA	chrV:9557589-9557721	SE	germline	1	-0.001	0.0195579	0.1	not sig	NA	NA
F56D6.17	MSTRG.10053	NA	chrIV:3896410-3896578	SE	germline	1	-0.01	0.0206434	0.028	Sperm Enriched	7.25617e-05	0.131
ptp-3	MSTRG.5750	ptp-3	chrII:10986070-10986100	SE	germline	1	0.212	0.0206973	-0.175	not sig	NA	NA
spas-1	MSTRG.19115	spas-1	chrV:9176419-9176602	SE	germline	0.402325	-0.067	0.0222836	-0.103	Oocyte Enriched	3.95801e-08	0.112
gpcp-1	MSTRG.22831	NA	chrX:3108246-3108377	SE	germline	NA	NA	0.0222836	-0.044	not sig	NA	NA
F42A10.9;efk-1	MSTRG.7810	efk-1	chrIII:6166440-6166464	SE	germline	0.76555	0.049	0.0248243	0.107	not sig	1	-0.007
Y39A1A.21;Y39A1A.22	MSTRG.8903	NA	chrIII:10706569-10706804	SE	germline	1	0.034	0.0256884	0.106	not sig	1	-0.011
ptp-3	MSTRG.5750	ptp-3	chrII:10985676-10986036	SE	germline	1	-0.012	0.0262442	-0.157	not sig	NA	NA
C07A12.7	MSTRG.23170	NA	chrX:4519351-4519453	SE	germline	0.53543	0.051	0.0264838	-0.07	not sig	NA	NA
gei-15	MSTRG.23772	NA	chrX:6821112-6821220	SE	germline	0.247511	-0.073	0.0282019	-0.122	not sig	1	0.002
F30F8.9	MSTRG.1482	NA	chrI:7837843-7837926	SE	germline	0.853718	-0.028	0.0287266	-0.064	Sperm Enriched	5.67968e-06	-0.058
F22F7.3	MSTRG.17546	NA	chrV:2111763-2111879	SE	germline	1	-0.036	0.0293468	-0.082	not sig	NA	NA
hpo-38	MSTRG.6655	NA	chrIII:234712-234774	SE	germline	1	0.06	0.0294672	-0.1	not sig	1	-0.033
Y38C1AA.1	MSTRG.9422	NA	chrIV:213409-213969	SE	germline	0.219815	0.032	0.0306726	0.058	Oocyte Enriched	0.000210077	-0.027
F40A3.7	MSTRG.18787	F40A3.7	chrV:7896866-7896960	SE	germline	1	0.002	0.0308514	-0.386	not sig	1	-0.5
gale-1	MSTRG.2615	NA	chrI:12975184-12975320	SE	germline	1	-0.011	0.0338154	0.067	not sig	1	0.014
ggr-3	MSTRG.4191	NA	chrII:5130611-5130689	SE	germline	0.981565	-0.037	0.0338154	-0.089	not sig	NA	NA
snt-7	MSTRG.25804	NA	chrX:15198652-15198803	SE	germline	0.857932	-0.076	0.0361751	0.106	not sig	NA	NA
ZK154.6	MSTRG.24066	NA	chrX:7790756-7790874	SE	germline	1	0.037	0.0364426	-0.074	not sig	1	-0.042
dyc-1	MSTRG.25528	dyc-1	chrX:14058185-14058476	SE	germline	1	0.085	0.0364426	-0.118	not sig	NA	NA
inx-21	MSTRG.542	NA	chrI:3617320-3617408	SE	germline	0.770401	0.023	0.036664	0.043	not sig	1	0.001
nlp-14	MSTRG.24360	nlp-14	chrX:8918470-8918605	SE	germline	0.863545	0.017	0.0384571	-0.021	not sig	NA	NA
elt-7	MSTRG.18028	NA	chrV:4771186-4771258	SE	germline	1	-0.004	0.0411029	0.039	not sig	NA	NA
C46C11.3	MSTRG.23203	NA	chrX:4629429-4629574	SE	germline	1	0.002	0.043062	-0.024	not sig	NA	NA
tnt-3	MSTRG.24108	NA	chrX:7938515-7938662	SE	germline	0.463889	-0.114	0.0445565	0.1	not sig	1	-0.057
nid-1	MSTRG.20316	NA	chrV:12912572-12912599	SE	germline	1	0.011	0.0463343	0.104	not sig	NA	NA
C17H11.6	MSTRG.24156	NA	chrX:8189809-8189956	SE	germline	0.575533	0.034	0.047015	-0.059	not sig	1	-0.023
jmjd-1.2	MSTRG.10235	NA	chrIV:4661356-4661395	SE	germline	0.437394	-0.102	0.0496214	0.147	Oocyte Enriched	0.000207501	-0.057
wars-1	MSTRG.21781	NA	chrV:18856081-18856567	SE	germline	0.45704	0.047	0.0497515	-0.061	not sig	0.479913	-0.007
tiar-1	MSTRG.4374	NA	chrII:5714292-5714356	SE	germline	0.115933	-0.057	0.0497515	-0.042	not sig	1	-0.002
tnt-3	MSTRG.24108	NA	chrX:7940198-7940276	SE	germline	1	-0.008	0.0497515	0.086	not sig	1	-0.079
epg-8	MSTRG.2010	epg-8	chrI:9933531-9933697	MXE	germline	0.906893	0.013	9.82354e-05	0.095	not sig	1	-0.004
srh-2	MSTRG.17321	NA	chrV:731402-731715	MXE	germline	0.491971	0.115	9.82354e-05	0.342	not sig	NA	NA
srh-2	MSTRG.17321	NA	chrV:731436-731715	MXE	germline	NA	NA	0.00012572	0.294	not sig	NA	NA
lgx-1	MSTRG.23401	lgx-1	chrX:5536498-5536636	MXE	germline	1	0.08	0.000268441	-0.312	not sig	NA	NA
T09E11.11	MSTRG.2506	NA	chrI:12345158-12345414	MXE	germline	NA	NA	0.000691169	0.141	not sig	NA	NA
F08F8.10	MSTRG.8076	NA	chrIII:7354382-7354442	MXE	germline	1	0.006	0.0140043	0.112	not sig	1	0.004
C06A6.4	MSTRG.12237	NA	chrIV:7827420-7827462	MXE	germline	0.667183	0.02	0.0140742	0.048	Oocyte Enriched	0.012948	-0.044
Y106G6H.6	MSTRG.2117	NA	chrI:10445217-10445400	MXE	germline	NA	NA	0.0225575	-0.086	not sig	NA	NA
mtm-3	MSTRG.7267	NA	chrIII:3791279-3791614	MXE	germline	NA	NA	0.0225575	0.055	not sig	NA	NA
ubc-15	MSTRG.3681	NA	chrII:2903212-2904148	MXE	germline	NA	NA	0.0258546	-0.051	not sig	1	0.002
M01H9.3	MSTRG.10182	NA	chrIV:4469823-4469842	MXE	germline	0.13026	0.059	0.0290649	-0.076	not sig	NA	NA
Y39B6A.3	MSTRG.21837	Y39B6A.3	chrV:19189763-19189851	A3SS	both	4.97999e-12	-0.183	0	-0.189	Oocyte Enriched	0	0.545
lin-28	MSTRG.1598	NA	chrI:8407801-8408503	A3SS	both	6.98195e-06	-0.069	0	-0.109	Oocyte Enriched	0	0.248
F56C11.3	MSTRG.31	F56C11.3	chrI:182544-182626	A3SS	both	0.0153409	-0.051	0	-0.263	Oocyte Enriched	0.000156495	0.046
nurf-1	MSTRG.6458	NA	chrII:14400791-14401114	A3SS	both	0	-0.24	3.75366e-13	-0.146	Oocyte Enriched	0	0.391
sqd-1	MSTRG.11680	NA	chrIV:6325310-6326458	A3SS	both	0	-0.244	3.75366e-12	-0.169	Oocyte Enriched	0	0.244
R107.5	MSTRG.8503	NA	chrIII:9052176-9052377	A3SS	both	1.69989e-13	-0.201	3.75366e-12	-0.154	Oocyte Enriched	0	0.275
F30F8.10	MSTRG.1482	NA	chrI:7846672-7846862	A3SS	both	0.0120688	-0.108	9.72199e-12	-0.267	Oocyte Enriched	0	0.467
icd-2;Y65B4BR.10	MSTRG.78	NA	chrI:536349-536881	A3SS	both	0.00101188	-0.088	2.08641e-11	-0.147	Oocyte Enriched	0	0.23
K01G5.8	MSTRG.8909	K01G5.8	chrIII:10740524-10740606	A3SS	both	0	-0.42	9.06077e-11	-0.17	Oocyte Enriched	0	0.565
Y37E11AM.2	MSTRG.10020	NA	chrIV:3723348-3723538	A3SS	both	0.00279944	-0.197	1.58707e-09	-0.273	Oocyte Enriched	0	0.332
picc-1	MSTRG.18320	NA	chrV:6025501-6025793	A3SS	both	0.00628302	-0.129	1.81433e-09	-0.263	Oocyte Enriched	0	0.358
ptc-1	MSTRG.4996	NA	chrII:7893529-7893661	A3SS	both	2.69438e-09	-0.252	1.78855e-08	-0.197	Oocyte Enriched	0	0.55
mtm-3	MSTRG.7267	NA	chrIII:3799800-3799875	A3SS	both	0	-0.399	1.92948e-08	-0.141	Oocyte Enriched	0	0.586
F42H10.6	MSTRG.8354	NA	chrIII:8479252-8479343	A3SS	both	3.4257e-05	-0.15	1.92948e-08	-0.161	Oocyte Enriched	7.15721e-08	0.103
F46B6.12;smg-4	MSTRG.19283	NA	chrV:9775797-9776324	A3SS	both	6.23384e-05	-0.115	2.26836e-08	-0.171	Oocyte Enriched	0	0.278
nra-2;rps-19	MSTRG.1924	NA	chrI:9621325-9621458	A3SS	both	1.0351e-05	-0.186	4.5704e-08	-0.217	Oocyte Enriched	0	0.503
ife-3	MSTRG.17211	ife-3	chrV:7157-7393	A3SS	both	0.00427186	-0.101	9.94594e-08	-0.163	Oocyte Enriched	0	0.299
T06D8.9;T06D8.10	MSTRG.5830	NA	chrII:11240559-11240988	A3SS	both	0.0263778	-0.049	1.07005e-07	-0.106	Oocyte Enriched	0	0.178
C16C2.4	MSTRG.1951	NA	chrI:9714233-9714526	A3SS	both	4.76614e-05	-0.083	2.15876e-07	-0.102	Oocyte Enriched	0	0.203
eif-3.L	MSTRG.4352	NA	chrII:5620733-5621087	A3SS	both	0.0045334	-0.096	3.83471e-07	-0.162	Oocyte Enriched	0	0.282
M02B1.3	MSTRG.13588	NA	chrIV:12839919-12840674	A3SS	both	0	-0.174	4.00873e-07	-0.089	Oocyte Enriched	0	0.235
flap-1	MSTRG.7973	NA	chrIII:6924799-6924886	A3SS	both	0.00147455	-0.352	4.56502e-07	-0.199	Oocyte Enriched	0	0.279
T05H10.4	MSTRG.5030	NA	chrII:8053754-8054045	A3SS	both	0.0212188	-0.095	8.14556e-07	-0.265	not sig	1	0.49
cif-1	MSTRG.10241	NA	chrIV:4708257-4708596	A3SS	both	0.00132787	-0.077	1.16973e-06	-0.101	Oocyte Enriched	0	0.142
taf-10	MSTRG.18009	NA	chrV:4687230-4687298	A3SS	both	0.0200146	-0.092	1.16973e-06	-0.174	Oocyte Enriched	0	0.406
Y110A7A.9	MSTRG.851	NA	chrI:5119729-5119913	A3SS	both	0.0127513	-0.148	1.60213e-06	-0.239	Oocyte Enriched	0	0.256
T01H8.2;rskn-1	MSTRG.1636	NA	chrI:8573522-8574345	A3SS	both	0.0276231	-0.096	2.12515e-06	-0.182	Oocyte Enriched	1.58764e-13	0.323
plin-1	MSTRG.1326	NA	chrI:7057990-7058077	A3SS	both	2.22365e-10	-0.132	3.57438e-06	-0.074	Oocyte Enriched	0	0.118
mdt-28	MSTRG.21032	mdt-28	chrV:15574745-15575074	A3SS	both	2.99546e-06	-0.143	3.57438e-06	-0.14	Oocyte Enriched	6.09553e-16	0.177
pac-1	MSTRG.8359	NA	chrIII:8518205-8518881	A3SS	both	2.37933e-10	-0.36	4.25699e-06	-0.171	Oocyte Enriched	0	0.537
kcnl-1	MSTRG.21934	NA	chrV:19569057-19569179	A3SS	both	0.0165729	-0.288	4.63735e-06	-0.3	not sig	NA	NA
rbm-25	MSTRG.20205	NA	chrV:12502563-12503086	A3SS	both	0	-0.322	8.5682e-06	-0.161	Oocyte Enriched	0	0.339
plst-1	MSTRG.9608	plst-1	chrIV:1291431-1291565	A3SS	both	3.39425e-15	-0.293	1.03854e-05	-0.189	Oocyte Enriched	0	0.475
C06E1.11	MSTRG.8392	NA	chrIII:8615894-8616421	A3SS	both	0.000639298	-0.398	1.04648e-05	-0.475	Sperm Enriched	3.20991e-05	-0.114
aqp-12;pqn-87	MSTRG.6073	NA	chrII:12209150-12209839	A3SS	both	0	-0.45	1.33238e-05	-0.17	Oocyte Enriched	0	0.35
C06E1.11	MSTRG.8392	NA	chrIII:8615894-8616356	A3SS	both	0.00657499	-0.285	1.74708e-05	-0.37	Sperm Enriched	9.57321e-05	-0.098
bet-1	MSTRG.723	NA	chrI:4526649-4526712	A3SS	both	0.00393816	-0.156	1.87912e-05	-0.215	Oocyte Enriched	0	0.426
hpo-10	MSTRG.7745	NA	chrIII:5881221-5881374	A3SS	both	1.18601e-10	-0.176	2.62971e-05	-0.118	Oocyte Enriched	0	0.242
rars-1	MSTRG.7545	rars-1	chrIII:4916367-4916584	A3SS	both	0.00145884	-0.056	2.89099e-05	-0.073	Oocyte Enriched	1.44464e-11	0.05
dhhc-9	MSTRG.22664	NA	chrX:2401765-2401875	A3SS	both	3.39425e-15	-0.298	3.58537e-05	-0.114	Oocyte Enriched	0	0.452
mau-8	MSTRG.13716	NA	chrIV:13379325-13379514	A3SS	both	0.0253345	-0.024	3.80841e-05	-0.053	Oocyte Enriched	0.000222091	0.028
ess-2	MSTRG.8357	NA	chrIII:8489599-8489781	A3SS	both	0.00498745	-0.053	4.82285e-05	-0.109	Oocyte Enriched	0.00623557	0.029
T04C9.1	MSTRG.7775	NA	chrIII:5995626-5995714	A3SS	both	2.28977e-08	-0.357	6.55692e-05	-0.199	Oocyte Enriched	0	0.378
let-526	MSTRG.883	NA	chrI:5302300-5302657	A3SS	both	7.66408e-05	-0.248	6.84236e-05	-0.144	Oocyte Enriched	0	0.412
egl-4	MSTRG.9694	cmk-1	chrIV:1875641-1876207	A3SS	both	6.0235e-12	-0.16	7.33589e-05	-0.073	Oocyte Enriched	0	0.265
nuo-2;T10E9.14	MSTRG.1200	NA	chrI:6531836-6532323	A3SS	both	0.036759	-0.069	7.70171e-05	-0.15	Oocyte Enriched	0.000318277	0.064
T28C6.7	MSTRG.12478	T28C6.7	chrIV:8832843-8833459	A3SS	both	0	-0.531	8.57813e-05	-0.07	Oocyte Enriched	9.28495e-08	0.304
nhr-49	MSTRG.1989	K10C3.4	chrI:9873704-9873821	A3SS	both	1.86411e-05	-0.107	9.04735e-05	-0.071	Oocyte Enriched	0	0.14
hpo-11	MSTRG.1352	NA	chrI:7142981-7143241	A3SS	both	0	-0.483	0.000104303	-0.221	Oocyte Enriched	0	0.337
F56A11.5	MSTRG.9487	NA	chrIV:568372-568896	A3SS	both	1.18949e-06	-0.144	0.000122872	-0.087	Oocyte Enriched	0	0.345
cdk-8	MSTRG.1671	NA	chrI:8704532-8704760	A3SS	both	0.000845163	-0.134	0.000129486	-0.164	Oocyte Enriched	0	0.349
rde-11	MSTRG.13660	NA	chrIV:13105514-13105628	A3SS	both	0.000150722	0.066	0.000145287	-0.058	not sig	0.336336	-0.013
tpra-1;anr-8	MSTRG.12503	NA	chrIV:8960383-8960531	A3SS	both	0.0301028	-0.051	0.000145287	-0.097	not sig	1	0.112
C01B10.9	MSTRG.11878	NA	chrIV:6634621-6634986	A3SS	both	0.00702541	-0.03	0.000170811	-0.039	Oocyte Enriched	6.91064e-08	0.071
T09E11.11	MSTRG.2506	NA	chrI:12345158-12345414	A3SS	both	1.07787e-11	-0.212	0.000268366	0.099	not sig	NA	NA
H24K24.3	MSTRG.17352	NA	chrV:913065-913492	A3SS	both	3.29248e-05	-0.048	0.000284841	-0.033	Oocyte Enriched	0	0.144
C04E6.11	MSTRG.18293	NA	chrV:5916427-5916815	A3SS	both	0.0398652	-0.132	0.00029353	-0.15	not sig	0.823723	0.023
ssl-1	MSTRG.9213	NA	chrIII:12743496-12744832	A3SS	both	8.22248e-07	-0.329	0.000347622	-0.248	Oocyte Enriched	0	0.385
lnp-1	MSTRG.23197	NA	chrX:4589961-4590455	A3SS	both	7.58224e-13	-0.319	0.000361007	-0.1	Oocyte Enriched	0.0227479	0.122
sao-1	MSTRG.20591	NA	chrV:13964931-13965069	A3SS	both	0.00206683	-0.099	0.000368133	-0.105	Oocyte Enriched	0	0.128
aph-2	MSTRG.2099	ears-1	chrI:10344563-10344831	A3SS	both	0.00023522	-0.122	0.000403814	-0.14	Oocyte Enriched	0	0.306
imph-1	MSTRG.7436	NA	chrIII:4557577-4557752	A3SS	both	0.0359062	-0.138	0.000407382	-0.193	Oocyte Enriched	0	0.307
zip-5	MSTRG.20425	NA	chrV:13265788-13268770	A3SS	both	0.0418976	-0.188	0.000480097	-0.386	not sig	NA	NA
pno-1	MSTRG.5466	NA	chrII:9742654-9742767	A3SS	both	1.8133e-07	-0.025	0.000634588	-0.017	not sig	0.333261	-0.005
Y105E8A.25	MSTRG.2885	NA	chrI:14571438-14571787	A3SS	both	0	-0.417	0.00069235	-0.103	Oocyte Enriched	0	0.416
R10E8.7;R10E8.3	MSTRG.21411	NA	chrV:18233784-18236058	A3SS	both	0.0233008	0.19	0.00069235	0.264	not sig	NA	NA
C37C3.18;C37C3.2	MSTRG.18777	NA	chrV:7855943-7856134	A3SS	both	0	-0.287	0.00069254	-0.048	Oocyte Enriched	0	0.363
H14E04.2	MSTRG.7042	H14E04.2	chrIII:2376505-2376691	A3SS	both	5.50579e-07	-0.268	0.000718518	-0.183	Oocyte Enriched	0	0.432
twk-14	MSTRG.20160	NA	chrV:12390525-12390630	A3SS	both	0.00379001	0.454	0.000726515	-0.555	not sig	NA	NA
R10E8.7;R10E8.3	MSTRG.21411	NA	chrV:18234568-18236058	A3SS	both	0.0305407	0.208	0.000954632	0.266	not sig	NA	NA
F44E2.3	MSTRG.8448	NA	chrIII:8829010-8829118	A3SS	both	7.76097e-09	-0.149	0.00112001	-0.079	Oocyte Enriched	0	0.225
nfi-1	MSTRG.4901	NA	chrII:7542149-7542258	A3SS	both	0.00985657	-0.126	0.00112001	-0.17	Oocyte Enriched	0	0.31
smcr-8	MSTRG.7563	NA	chrIII:5000862-5000925	A3SS	both	0.0218757	-0.049	0.00142862	-0.055	not sig	0.243805	0.026
sel-10	MSTRG.20564	NA	chrV:13819629-13819726	A3SS	both	0.0108058	-0.113	0.00150276	-0.163	Oocyte Enriched	0	0.269
dpff-1	MSTRG.7753	NA	chrIII:5905396-5905614	A3SS	both	0.00103046	-0.166	0.00160367	-0.166	Oocyte Enriched	0	0.443
R07H5.8	MSTRG.13148	NA	chrIV:11210172-11210290	A3SS	both	0	-0.626	0.00169634	-0.055	Oocyte Enriched	0	0.459
oef-1	MSTRG.12173	oef-1	chrIV:7551368-7551511	A3SS	both	3.01079e-11	-0.165	0.00169883	-0.126	Oocyte Enriched	0	0.197
hmp-1	MSTRG.19972	NA	chrV:11851622-11852165	A3SS	both	3.80849e-05	-0.18	0.00169883	-0.134	Oocyte Enriched	0	0.444
C09B7.2	MSTRG.22727	NA	chrX:2670257-2670592	A3SS	both	0	-0.092	0.00198615	-0.023	Oocyte Enriched	2.90387e-08	0.082
nos-3;Y53C12B.7	MSTRG.5467	nos-3	chrII:9749848-9750454	A3SS	both	7.84478e-07	-0.198	0.00198659	-0.122	Oocyte Enriched	0	0.175
cfim-2	MSTRG.12500	NA	chrIV:8927917-8928026	A3SS	both	8.61249e-06	-0.223	0.00198659	-0.151	Oocyte Enriched	0	0.211
gtf-2H2C;bath-43	MSTRG.8780	NA	chrIII:10090727-10091366	A3SS	both	0.0286864	-0.033	0.0019895	-0.036	Oocyte Enriched	4.939e-05	0.022
atf-7	MSTRG.7421	NA	chrIII:4492651-4492768	A3SS	both	0	-0.247	0.0020055	-0.107	Oocyte Enriched	0	0.159
R02F2.1	MSTRG.7659	R02F2.1	chrIII:5505247-5505401	A3SS	both	0	-0.591	0.00216323	-0.041	Oocyte Enriched	0	0.366
T25C8.1;hip-1	MSTRG.9358	NA	chrIII:13614695-13615015	A3SS	both	1.12516e-05	-0.035	0.00216323	-0.022	Oocyte Enriched	0	0.024
mdt-17	MSTRG.22073	swsn-1	chrV:20254871-20255001	A3SS	both	1.02145e-07	-0.253	0.00223975	-0.18	Oocyte Enriched	0	0.382
cye-1	MSTRG.1259	cye-1	chrI:6782112-6782385	A3SS	both	0.0358193	-0.067	0.00225662	-0.106	Oocyte Enriched	0	0.188
Y71F9AL.12	MSTRG.420	NA	chrI:2872665-2872762	A3SS	both	0.000243616	-0.125	0.00250014	-0.114	Oocyte Enriched	0	0.205
plpp-1.1	MSTRG.3918	plpp-1.1	chrII:3925519-3926085	A3SS	both	3.39425e-15	-0.255	0.00257539	-0.084	Oocyte Enriched	0	0.251
cash-1	MSTRG.19445	NA	chrV:10363143-10363582	A3SS	both	0.00179116	-0.143	0.00275951	-0.139	Oocyte Enriched	0	0.402
Y37E3.17	MSTRG.288	NA	chrI:2144868-2144983	A3SS	both	4.65783e-12	-0.185	0.00279306	-0.067	Oocyte Enriched	0	0.234
fipp-1;neg-1	MSTRG.17955	fipp-1	chrV:4372936-4373811	A3SS	both	0.000531559	-0.23	0.00279306	-0.161	Oocyte Enriched	0	0.343
T10E10.3	MSTRG.23639	NA	chrX:6313636-6314205	A3SS	both	3.09564e-05	0.574	0.00279306	-0.358	not sig	NA	NA
mans-1	MSTRG.1438	NA	chrI:7569771-7570126	A3SS	both	0.0310429	-0.029	0.00291317	-0.041	Oocyte Enriched	6.88877e-06	0.036
F27C1.2	MSTRG.925	F27C1.2	chrI:5430760-5430992	A3SS	both	0	-0.328	0.00291689	-0.083	Oocyte Enriched	0	0.2
cogc-6	MSTRG.18865	NA	chrV:8220083-8220326	A3SS	both	0.00463987	-0.041	0.00320585	-0.044	Oocyte Enriched	1.48053e-10	0.047
unc-57	MSTRG.756	NA	chrI:4677669-4677724	A3SS	both	0.00643537	-0.136	0.00332568	-0.134	Oocyte Enriched	0	0.167
pqn-87	MSTRG.6073	NA	chrII:12210812-12211182	A3SS	both	1.3577e-13	-0.392	0.00343781	-0.135	Oocyte Enriched	0	0.534
gip-1	MSTRG.7040	NA	chrIII:2356678-2356768	A3SS	both	0.014109	-0.059	0.00343781	0.083	Sperm Enriched	0.0014806	0.047
mecr-1	MSTRG.6267	NA	chrII:13186748-13186979	A3SS	both	0.002554	-0.041	0.0036117	-0.031	Oocyte Enriched	0.00335137	0.018
mes-3	MSTRG.826	NA	chrI:5000221-5000351	A3SS	both	0.000914808	-0.078	0.00379619	0.086	Sperm Enriched	1.10389e-05	0.038
B0491.1	MSTRG.5852	NA	chrII:11349318-11349684	A3SS	both	0.0458825	-0.153	0.0038264	-0.246	Oocyte Enriched	0	0.506
Y104H12D.2	MSTRG.9586	NA	chrIV:1178290-1178440	A3SS	both	0.034774	-0.037	0.00405119	-0.055	Oocyte Enriched	4.51713e-06	0.04
gfi-2	MSTRG.1957	eat-16	chrI:9743386-9744142	A3SS	both	0.0403763	-0.036	0.00405119	-0.06	Oocyte Enriched	0.000671033	0.046
chtl-1	MSTRG.23355	NA	chrX:5358608-5358768	A3SS	both	0.0168172	-0.201	0.00422212	-0.257	Oocyte Enriched	2.24163e-10	0.169
apb-3;nud-2	MSTRG.1486	NA	chrI:7857822-7858293	A3SS	both	0	-0.371	0.00423567	-0.083	Oocyte Enriched	0	0.182
vps-39	MSTRG.20631	vps-39	chrV:14036621-14036911	A3SS	both	0.0286606	-0.141	0.00440044	-0.206	Oocyte Enriched	0	0.366
F41G3.6	MSTRG.4691	NA	chrII:6743757-6743906	A3SS	both	0.00340028	-0.132	0.00473704	-0.126	Oocyte Enriched	0	0.46
C55A6.10	MSTRG.19861	NA	chrV:11505819-11506108	A3SS	both	0.00752575	-0.314	0.00477438	-0.226	not sig	0.460525	0.053
lst-4	MSTRG.14344	NA	chrIV:14062689-14063030	A3SS	both	1.28975e-05	-0.228	0.00485923	-0.137	Oocyte Enriched	0	0.197
pak-2	MSTRG.19670	NA	chrV:11038598-11038986	A3SS	both	0.0452871	-0.113	0.00485923	-0.183	Oocyte Enriched	2.24548e-11	0.227
tsfm-1	MSTRG.20107	NA	chrV:12270752-12271190	A3SS	both	0.0212633	-0.038	0.00485923	-0.057	not sig	1	0.007
szy-20	MSTRG.5274	NA	chrII:8968126-8968435	A3SS	both	0.000193824	-0.161	0.00496762	-0.161	Oocyte Enriched	6.09553e-16	0.116
Y32H12A.7	MSTRG.7639	NA	chrIII:5383394-5383601	A3SS	both	3.91744e-07	-0.225	0.00508361	-0.145	Oocyte Enriched	0	0.362
farl-11	MSTRG.4784	NA	chrII:7104751-7104930	A3SS	both	0.0123091	-0.122	0.00508361	-0.146	Oocyte Enriched	0	0.422
row-1	MSTRG.2125	NA	chrI:10476248-10476735	A3SS	both	0.0286606	-0.08	0.0051138	-0.195	Oocyte Enriched	0	0.201
parg-1	MSTRG.12463	NA	chrIV:8747440-8748024	A3SS	both	0.00841654	0.059	0.00512081	0.05	Oocyte Enriched	2.34576e-12	-0.042
sftd-3	MSTRG.5269	NA	chrII:8962590-8962717	A3SS	both	1.68244e-10	-0.299	0.00512287	-0.133	Oocyte Enriched	0	0.322
Y49G5B.1	MSTRG.18121	NA	chrV:5228144-5228324	A3SS	both	0.0174078	-0.199	0.00515552	-0.196	Oocyte Enriched	9.8795e-05	0.134
M01H9.3	MSTRG.10182	NA	chrIV:4469823-4470232	A3SS	both	0.00903623	-0.021	0.00516099	0.022	not sig	1	0.001
pcs-1	MSTRG.5925	pcs-1	chrII:11576831-11576950	A3SS	both	0.000654651	-0.141	0.00519001	-0.094	not sig	0.110013	0.042
M01H9.3	MSTRG.10182	NA	chrIV:4469823-4469976	A3SS	both	0.00947566	-0.035	0.00520133	0.037	not sig	1	0.002
F57B9.1	MSTRG.7982	NA	chrIII:6962657-6962822	A3SS	both	0.00023661	-0.036	0.00529539	-0.024	not sig	1	0
Y57A10A.2	MSTRG.6064	NA	chrII:12148476-12148651	A3SS	both	1.42723e-07	0.815	0.0061374	-0.194	Oocyte Enriched	0.000456373	0.134
M01E5.3	MSTRG.2673	NA	chrI:13282323-13282407	A3SS	both	1.13141e-06	-0.332	0.00627722	-0.161	Oocyte Enriched	0	0.356
Y106G6A.1	MSTRG.2010	epg-8	chrI:9936866-9937041	A3SS	both	0.00010904	-0.028	0.00644697	-0.026	not sig	1	0.004
rfp-1	MSTRG.8326	NA	chrIII:8360724-8361113	A3SS	both	0.0143637	-0.17	0.00752203	-0.145	Oocyte Enriched	0	0.383
F41H10.4	MSTRG.10732	NA	chrIV:5365144-5365993	A3SS	both	6.87199e-06	-0.171	0.00752203	-0.104	Oocyte Enriched	4.00269e-08	0.247
lin-23	MSTRG.4574	NA	chrII:6373804-6374544	A3SS	both	0.0105471	-0.108	0.00806638	-0.115	Oocyte Enriched	0	0.462
F56C9.10	MSTRG.8077	NA	chrIII:7332412-7332835	A3SS	both	1.33611e-06	-0.176	0.00829178	-0.07	Oocyte Enriched	0	0.289
pptr-1	MSTRG.21196	NA	chrV:16364041-16364341	A3SS	both	4.26134e-07	-0.146	0.00898001	-0.052	Oocyte Enriched	0	0.173
rab-39	MSTRG.5356	NA	chrII:9322260-9322381	A3SS	both	0.0126429	-0.058	0.00898001	-0.056	Oocyte Enriched	5.20653e-14	0.146
F08F8.9	MSTRG.8076	NA	chrIII:7353929-7353979	A3SS	both	0.00384072	-0.14	0.00930153	0.113	not sig	1	0.004
rbpl-1	MSTRG.1745	NA	chrI:9011079-9011427	A3SS	both	2.03743e-07	-0.335	0.00961471	-0.152	Oocyte Enriched	0	0.481
mcu-1	MSTRG.11314	mcu-1	chrIV:5938661-5938897	A3SS	both	0.000126601	-0.137	0.00984115	-0.097	Oocyte Enriched	0	0.167
Y67H2A.10	MSTRG.13699	NA	chrIV:13288836-13288909	A3SS	both	0.00410045	-0.224	0.0109781	-0.232	Oocyte Enriched	0	0.206
ceh-38	MSTRG.4751	NA	chrII:6953782-6954029	A3SS	both	0.00833763	-0.149	0.0112035	-0.142	Oocyte Enriched	0	0.25
mfn-1	MSTRG.5880	NA	chrII:11470901-11471018	A3SS	both	0.0102448	-0.086	0.0116514	-0.079	Oocyte Enriched	0	0.247
pals-31	MSTRG.17305	NA	chrV:636898-637533	A3SS	both	0.0180645	0.043	0.0120171	0.052	not sig	NA	NA
cfim-2	MSTRG.12500	NA	chrIV:8926471-8926541	A3SS	both	3.88074e-06	-0.265	0.012352	-0.123	Oocyte Enriched	0	0.274
acl-4	MSTRG.22595	acl-4	chrX:2067115-2067214	A3SS	both	3.27516e-14	-0.155	0.0124192	-0.036	not sig	1	0.008
ZK1127.3;cth-2	MSTRG.4774	NA	chrII:7055925-7056185	A3SS	both	0.00841654	-0.08	0.0138506	-0.079	Oocyte Enriched	0	0.422
K10G6.4	MSTRG.3924	NA	chrII:3974572-3974779	A3SS	both	0.00515268	-0.188	0.0150472	0.2	not sig	NA	NA
F53C11.4	MSTRG.20560	NA	chrV:13785404-13785622	A3SS	both	0.00032643	-0.216	0.0152955	-0.12	Oocyte Enriched	0	0.301
usp-48	MSTRG.1869	NA	chrI:9509462-9510125	A3SS	both	0.0348254	-0.159	0.0158042	-0.181	Oocyte Enriched	0	0.398
sem-4	MSTRG.1322	NA	chrI:7047935-7048832	A3SS	both	0.00445326	-0.196	0.0178144	-0.153	not sig	1	0.071
dnj-5	MSTRG.4722	NA	chrII:6857505-6857652	A3SS	both	0.0385114	-0.113	0.018242	-0.117	Oocyte Enriched	1.20799e-13	0.122
tap-1	MSTRG.25642	NA	chrX:14591278-14591382	A3SS	both	8.70224e-11	-0.15	0.0185893	-0.033	not sig	1	0.131
nhr-12	MSTRG.19354	NA	chrV:10082414-10082685	A3SS	both	1.64781e-05	-0.23	0.0190424	-0.187	not sig	1	0.141
rbpl-1	MSTRG.1745	NA	chrI:9013087-9013196	A3SS	both	0.040252	-0.047	0.0196875	-0.065	Oocyte Enriched	0	0.173
Y82E9BR.2	MSTRG.6884	NA	chrIII:1442698-1443384	A3SS	both	0.0102556	0.097	0.0200565	0.195	not sig	0.713395	0.005
nhr-152	MSTRG.18727	nhr-152	chrV:7687889-7688228	A3SS	both	0	-0.462	0.0207509	-0.101	not sig	NA	NA
panl-3	MSTRG.8703	NA	chrIII:9820159-9820469	A3SS	both	0.000810385	-0.32	0.0207648	-0.125	Oocyte Enriched	0	0.448
C05C10.2	MSTRG.5508	NA	chrII:9930447-9930844	A3SS	both	3.87347e-05	-0.126	0.0207648	-0.113	Oocyte Enriched	2.40728e-15	0.094
ZC376.6	MSTRG.20666	ZC376.6	chrV:14190161-14190295	A3SS	both	0.000716247	-0.221	0.0212136	-0.217	Oocyte Enriched	0	0.438
apc-2	MSTRG.8240	NA	chrIII:8082126-8082265	A3SS	both	1.7155e-09	-0.12	0.0214738	-0.065	Oocyte Enriched	0	0.114
dab-1	MSTRG.5082	NA	chrII:8228238-8228386	A3SS	both	1.19543e-10	-0.238	0.0215788	-0.098	Oocyte Enriched	0	0.354
gen-1	MSTRG.7827	NA	chrIII:6247136-6247311	A3SS	both	3.67444e-06	-0.219	0.0219737	-0.124	Oocyte Enriched	0	0.363
mex-3	MSTRG.24	NA	chrI:129166-129333	A3SS	both	1.258e-06	-0.067	0.0230362	-0.055	Oocyte Enriched	0	0.093
T01G9.2	MSTRG.1573	T01G9.2	chrI:8287863-8288004	A3SS	both	0	-0.257	0.023451	-0.068	Oocyte Enriched	4.44051e-08	0.228
lid-1	MSTRG.2074	lid-1	chrI:10192170-10192587	A3SS	both	0.00507045	0.017	0.0234902	-0.017	not sig	1	0.009
M04F3.4	MSTRG.782	NA	chrI:4772233-4772382	A3SS	both	0.000431908	-0.078	0.0247859	-0.037	Oocyte Enriched	8.16737e-10	0.126
F46B6.5	MSTRG.19283	NA	chrV:9780204-9780425	A3SS	both	0.0070512	-0.107	0.0247859	-0.085	Oocyte Enriched	7.64554e-05	0.141
T24B1.1	MSTRG.1457	NA	chrI:7677527-7677755	A3SS	both	1.18949e-06	-0.149	0.0248073	-0.067	Oocyte Enriched	0	0.15
spsb-1	MSTRG.6609	Y46E12BR.1	chrII:15222824-15223191	A3SS	both	1.49359e-09	-0.245	0.0253465	-0.071	Oocyte Enriched	0	0.4
F25B4.5	MSTRG.18224	NA	chrV:5682207-5682293	A3SS	both	4.43238e-05	-0.127	0.0258542	-0.079	not sig	0.467276	-0.008
imph-1	MSTRG.7436	NA	chrIII:4559630-4560557	A3SS	both	1.00009e-14	-0.34	0.0287858	-0.122	Oocyte Enriched	0	0.209
rme-8	MSTRG.1539	NA	chrI:8085991-8086586	A3SS	both	0.00249086	0.563	0.0287858	0.322	Oocyte Enriched	3.88404e-06	-0.035
dpf-3	MSTRG.1276	NA	chrI:6839003-6839144	A3SS	both	3.40226e-07	-0.195	0.0288243	-0.092	Oocyte Enriched	0	0.403
scpl-1	MSTRG.2043	NA	chrI:10093678-10093783	A3SS	both	0	-0.35	0.0290888	-0.165	Oocyte Enriched	0	0.329
math-33	MSTRG.19713	math-33	chrV:11117885-11117964	A3SS	both	0.00501468	-0.159	0.0293495	-0.158	Oocyte Enriched	0	0.298
Y40B1A.3	MSTRG.2690	NA	chrI:13354059-13354225	A3SS	both	1.98888e-05	-0.446	0.0293495	-0.229	Oocyte Enriched	2.99014e-15	0.327
cogc-3	MSTRG.437	NA	chrI:2943070-2943203	A3SS	both	3.23246e-05	-0.311	0.029921	0.484	Sperm Enriched	0	0.337
M01F1.4;mir-4927	MSTRG.7220	NA	chrIII:3507085-3507210	A3SS	both	1.35073e-11	-0.38	0.0307174	-0.147	Oocyte Enriched	0	0.347
F08F8.9;F08F8.10	MSTRG.8076	NA	chrIII:7353929-7354335	A3SS	both	0.00194447	-0.231	0.031781	0.12	not sig	1	0.008
sop-2	MSTRG.6090	NA	chrII:12342629-12343505	A3SS	both	4.90628e-06	-0.555	0.0317848	-0.19	not sig	1	0.522
gmps-1	MSTRG.5721	NA	chrII:10866090-10866609	A3SS	both	3.39425e-15	-0.38	0.0329776	-0.119	Oocyte Enriched	0	0.279
rsa-1;dao-5	MSTRG.2072	rsa-1	chrI:10187259-10187550	A3SS	both	6.23384e-05	-0.085	0.0333077	-0.057	Oocyte Enriched	0	0.294
tdp-1	MSTRG.5282	NA	chrII:8998932-8999150	A3SS	both	1.25375e-08	-0.187	0.0339453	-0.094	Oocyte Enriched	0	0.123
denn-4	MSTRG.9702	denn-4	chrIV:1939090-1939188	A3SS	both	0.000581006	-0.399	0.0341718	-0.274	Oocyte Enriched	7.81081e-09	0.226
bet-1	MSTRG.723	NA	chrI:4528952-4529141	A3SS	both	2.12073e-13	-0.382	0.0346909	-0.118	Oocyte Enriched	0	0.229
K02C4.3	MSTRG.5037	K02C4.3	chrII:8082097-8082440	A3SS	both	3.70145e-12	-0.12	0.0348103	-0.062	Oocyte Enriched	0	0.12
fre-1	MSTRG.22041	fre-1	chrV:20082072-20082318	A3SS	both	0.00288159	-0.196	0.0379536	-0.168	Oocyte Enriched	2.33045e-10	0.202
lmd-1	MSTRG.1643	lmd-1	chrI:8610348-8610449	A3SS	both	0.0285209	-0.077	0.0387725	-0.098	Oocyte Enriched	0	0.202
ric-7	MSTRG.20615	NA	chrV:13995103-13995268	A3SS	both	4.02849e-06	-0.187	0.0393561	-0.072	Oocyte Enriched	0	0.205
T23G7.2	MSTRG.5324	W07A12.8	chrII:9169299-9169776	A3SS	both	0.034275	-0.097	0.0393561	-0.068	not sig	1	-0.001
alh-6	MSTRG.3271	NA	chrII:1308744-1309065	A3SS	both	0.0111091	0.048	0.0398576	-0.035	Oocyte Enriched	0.00154833	0.02
unc-71	MSTRG.9240	NA	chrIII:12889330-12889974	A3SS	both	0.00260193	-0.059	0.0400041	-0.04	not sig	0.472934	0.021
kin-4	MSTRG.13205	kin-4	chrIV:11439146-11439285	A3SS	both	6.57882e-05	-0.279	0.0405231	-0.201	Oocyte Enriched	0	0.457
cyy-1	MSTRG.8336	NA	chrIII:8406971-8407100	A3SS	both	0.0226376	-0.11	0.0408754	-0.113	Oocyte Enriched	0	0.431
nmad-1	MSTRG.7669	NA	chrIII:5554163-5554398	A3SS	both	0.0238441	-0.01	0.0438468	-0.01	Oocyte Enriched	0.00206262	0.043
atg-5	MSTRG.229	NA	chrI:1712709-1712828	A3SS	both	4.77608e-10	-0.325	0.0446853	-0.106	Oocyte Enriched	0	0.314
Y69H2.7	MSTRG.21746	NA	chrV:18695520-18696069	A3SS	both	0.00905583	-0.18	0.0449701	-0.171	Oocyte Enriched	0	0.229
F08B4.3	MSTRG.12442	NA	chrIV:8666904-8667177	A3SS	both	0.0195227	-0.041	0.0449701	-0.038	not sig	0.174614	-0.048
C03F11.4	MSTRG.23363	NA	chrX:5406065-5406202	A3SS	both	0.0275418	0.265	0.0449701	0.468	not sig	1	-0.057
atfs-1	MSTRG.20667	NA	chrV:14196332-14196419	A3SS	both	2.73018e-07	-0.275	0.0451573	-0.102	Oocyte Enriched	1.80929e-15	0.166
swp-1	MSTRG.7705	NA	chrIII:5702575-5703115	A3SS	both	0.0209001	-0.183	0.0463783	-0.157	Oocyte Enriched	1.80929e-15	0.297
pps-1	MSTRG.12871	NA	chrIV:10162713-10163797	A3SS	both	0.00224817	-0.123	0.0470952	-0.069	Oocyte Enriched	6.09553e-16	0.259
F56C9.10	MSTRG.8077	NA	chrIII:7332939-7333431	A3SS	both	0	-0.486	0.0473825	-0.105	Oocyte Enriched	0	0.529
W08G11.3	MSTRG.21196	NA	chrV:16370836-16371224	A3SS	both	0.000188095	-0.248	0.0473825	-0.128	Oocyte Enriched	0	0.149
F13G3.7	MSTRG.1387	F13G3.7	chrI:7305196-7305514	A3SS	both	2.3901e-07	-0.219	0.0481711	-0.102	Oocyte Enriched	0	0.391
jac-1	MSTRG.16300	NA	chrIV:15999149-15999314	A3SS	both	0	-0.653	0.0481711	-0.098	not sig	1	0.761
unc-57	MSTRG.756	NA	chrI:4678567-4679600	A3SS	both	0	-0.354	0.0486379	-0.116	Oocyte Enriched	0	0.144
rbpl-1	MSTRG.1745	NA	chrI:9009520-9009946	A3SS	both	3.01188e-09	-0.217	0.0488919	-0.084	Oocyte Enriched	1.43955e-07	0.153
Y97E10AR.4;Y97E10AR.6	MSTRG.18820	NA	chrV:8012390-8012745	A3SS	both	0	-0.363	0.0491274	-0.059	Oocyte Enriched	0	0.218
K09E9.3	MSTRG.25908	NA	chrX:15613061-15613287	A3SS	both	0.0419431	-0.248	0.0491274	-0.167	Oocyte Enriched	0.0263416	0.101
nas-6	MSTRG.17179	nas-6	chrIV:17488978-17489070	A5SS	both	0.0313654	0.175	0.0138431	0.186	not sig	NA	NA
	MSTRG.7757	NA	chrIII:5920301-5922561	A5SS	both	0.0148345	0.338	0.0264543	-0.389	not sig	NA	NA
M01H9.3	MSTRG.10182	NA	chrIV:4469718-4469842	A5SS	both	0.0110802	0.07	0.0304913	-0.058	Sperm Enriched	0.00300672	-0.012
F45H10.5	MSTRG.6299	NA	chrII:13502425-13502675	A5SS	both	0.000743786	0.536	0.0357025	-0.237	not sig	NA	NA
prdx-6	MSTRG.9423	NA	chrIV:219461-220869	RI	both	0	-0.11	0	-0.041	not sig	1	-0.003
amt-2	MSTRG.13636	NA	chrIV:13044963-13045424	RI	both	7.0611e-05	0.628	3.55159e-06	-0.461	not sig	NA	NA
fbxb-83;T17A3.12;fbxb-84	MSTRG.6642	NA	chrIII:144485-146336	RI	both	0.00126219	-0.677	3.3861e-05	0.667	not sig	NA	NA
R74.8	MSTRG.7352	NA	chrIII:4207890-4208781	RI	both	7.89837e-05	0.077	3.82591e-05	0.085	not sig	1	-0.001
mes-3	MSTRG.826	NA	chrI:5002155-5003161	RI	both	0.000236608	0.182	4.89459e-05	0.198	not sig	1	-0.003
F45H10.5	MSTRG.6299	NA	chrII:13502425-13503822	RI	both	0.000693403	0.353	0.000552603	0.35	not sig	NA	NA
T01D3.3	MSTRG.20532	NA	chrV:13708012-13708396	RI	both	0.00241728	-0.597	0.00135902	0.528	not sig	NA	NA
F45F2.9	MSTRG.18936	NA	chrV:8512942-8513573	RI	both	0.0334747	-0.067	0.00372857	-0.075	not sig	0.83175	-0.019
C29F7.1	MSTRG.25376	NA	chrX:13414446-13414734	RI	both	0.00593507	-0.216	0.00682792	0.27	not sig	NA	NA
F35E12.13;F35E12.6	MSTRG.20542	NA	chrV:13733866-13734164	RI	both	0.0443696	-0.499	0.0086318	0.591	not sig	1	-1
F41H10.3	MSTRG.10733	NA	chrIV:5373666-5374147	RI	both	0.00993472	-0.146	0.00931152	-0.107	not sig	1	0.006
ggtb-1;B0280.17;21ur-11608;B0280.11	MSTRG.8028	NA	chrIII:7134844-7136520	RI	both	0.0388272	-0.009	0.011206	0.011	Oocyte Enriched	0	-0.732
srz-64;Y57G7A.8	MSTRG.3267	NA	chrII:1290799-1291032	RI	both	0.0320896	0.242	0.0121872	-0.311	not sig	1	-0.102
unc-119	MSTRG.8938	NA	chrIII:10907779-10908927	RI	both	9.93401e-05	0.043	0.0146711	0.066	not sig	1	0.005
C44B9.3	MSTRG.8936	NA	chrIII:10879323-10879569	RI	both	0.0488902	-0.069	0.0149099	-0.078	not sig	1	-0.003
Y116F11B.17;linc-51	MSTRG.22001	NA	chrV:19820974-19821123	RI	both	6.68354e-14	-0.247	0.0166799	-0.049	not sig	NA	NA
nhr-110	MSTRG.17451	NA	chrV:1623936-1624632	RI	both	0.0262467	0.31	0.0189393	0.193	not sig	NA	NA
fbxc-45	MSTRG.9872	NA	chrIV:2919824-2921772	RI	both	0.0242215	0.188	0.0229029	0.255	Oocyte Enriched	0.00447575	-0.058
pen-2	MSTRG.8999	NA	chrIII:11343934-11344240	RI	both	0.000373317	-0.086	0.0236578	-0.071	not sig	1	0.021
M04C3.1	MSTRG.21910	NA	chrV:19438576-19439205	RI	both	1.32402e-06	0.293	0.0263942	-0.161	not sig	1	0.422
fbxa-46	MSTRG.22577	NA	chrX:1983896-1984581	RI	both	0.0217701	-0.295	0.030889	0.159	not sig	NA	NA
C33D9.9;C33D9.6	MSTRG.12468	NA	chrIV:8775040-8776041	RI	both	0.0148051	0.093	0.0333249	0.083	not sig	1	-0.165
stn-1;F30A10.9	MSTRG.1868	NA	chrI:9504514-9504976	RI	both	0.00993472	-0.114	0.0476646	-0.097	Oocyte Enriched	1.82783e-06	0.1
coel-1	MSTRG.23097	coel-1	chrX:4268995-4270546	RI	both	0.0210335	-0.017	0.0499809	0.014	not sig	1	0.448
B0284.5	MSTRG.7388	NA	chrIII:4374287-4374432	SE	both	0.0002515	-0.44	0.00858608	0.389	not sig	NA	NA
mes-3	MSTRG.826	NA	chrI:4999789-4999846	SE	both	7.30931e-08	-0.173	0.043062	-0.074	not sig	1	-0.002
unc-16	MSTRG.8629	NA	chrIII:9551627-9552912	A3SS	soma	0.00294118	-0.128	0.0504343	-0.074	not sig	1	-0.134
lgc-13	MSTRG.25126	NA	chrX:12109595-12109897	A3SS	soma	0.036047	0.209	0.0504343	0.126	not sig	1	1
Y61A9LA.3	MSTRG.17989	NA	chrV:4572297-4572388	A3SS	soma	2.74405e-07	-0.321	0.0504793	-0.07	Oocyte Enriched	9.14813e-05	0.162
F25B4.5	MSTRG.18224	NA	chrV:5681479-5681865	A3SS	soma	0.0385114	0.037	0.0506686	-0.04	not sig	1	0
pptr-2	MSTRG.19666	NA	chrV:11029177-11029282	A3SS	soma	0.0171106	-0.141	0.0508646	-0.106	Oocyte Enriched	0	0.389
ppfr-1	MSTRG.1824	NA	chrI:9364889-9365162	A3SS	soma	8.24791e-05	-0.26	0.0510214	-0.086	Oocyte Enriched	0	0.329
F31D4.5	MSTRG.22211	NA	chrV:20858196-20859039	A3SS	soma	0.0379936	0.324	0.0521468	0.192	not sig	NA	NA
sos-1	MSTRG.17983	NA	chrV:4518430-4518551	A3SS	soma	0.000167699	-0.24	0.0525164	-0.094	Oocyte Enriched	1.6457e-13	0.394
T24B8.7	MSTRG.5291	NA	chrII:9047601-9047831	A3SS	soma	0.00098518	-0.308	0.0540662	-0.194	Oocyte Enriched	0	0.339
ret-1	MSTRG.20835	ret-1	chrV:14829738-14830122	A3SS	soma	0	-0.285	0.0556028	-0.048	Oocyte Enriched	0	0.351
smk-1	MSTRG.18967	NA	chrV:8612798-8613059	A3SS	soma	0.011121	-0.161	0.0559555	-0.131	Oocyte Enriched	0.000288237	0.076
tram-1	MSTRG.12886	qns-1	chrIV:10219985-10220607	A3SS	soma	0	-0.37	0.0572354	-0.082	Oocyte Enriched	0	0.368
ced-7	MSTRG.8635	NA	chrIII:9573464-9573649	A3SS	soma	4.72055e-07	-0.303	0.0591167	-0.145	Oocyte Enriched	3.15329e-06	0.228
impt-1	MSTRG.2258	NA	chrI:10968558-10968726	A3SS	soma	0.00127179	-0.101	0.0599107	-0.086	Oocyte Enriched	0	0.386
cash-1	MSTRG.19445	NA	chrV:10363034-10363096	A3SS	soma	0.00172772	-0.135	0.0610158	-0.088	Oocyte Enriched	0	0.359
ptr-5	MSTRG.26209	NA	chrX:17320389-17320528	A3SS	soma	0.00044975	-0.304	0.0610158	0.138	not sig	NA	NA
dab-1	MSTRG.5082	NA	chrII:8227552-8228193	A3SS	soma	0	-0.324	0.0616305	-0.086	Oocyte Enriched	0	0.26
gale-1	MSTRG.2615	NA	chrI:12975399-12975635	A3SS	soma	0	0.248	0.0616305	-0.064	not sig	0.0687735	-0.04
daf-3	MSTRG.22362	daf-3	chrX:822021-822691	A3SS	soma	0.000412202	-0.129	0.0616305	0.082	not sig	1	0.5
math-33	MSTRG.19713	math-33	chrV:11114300-11114645	A3SS	soma	0.0392794	-0.107	0.0635691	-0.087	Oocyte Enriched	0	0.314
M03F8.3	MSTRG.18301	NA	chrV:5941585-5941807	A3SS	soma	4.18825e-08	-0.187	0.0638194	-0.087	Oocyte Enriched	0	0.407
csn-3	MSTRG.9422	NA	chrIV:194831-194966	A3SS	soma	0.0201743	-0.048	0.0654248	-0.046	Oocyte Enriched	2.31639e-08	0.079
rme-4	MSTRG.24713	NA	chrX:10374961-10375024	A3SS	soma	7.96592e-06	-0.27	0.0660723	-0.079	Oocyte Enriched	0	0.254
etr-1	MSTRG.3016	etr-1	chrII:167894-168047	A3SS	soma	4.2964e-12	-0.262	0.0666416	-0.042	Oocyte Enriched	0	0.448
smk-1	MSTRG.18967	NA	chrV:8614054-8614203	A3SS	soma	0.00172759	-0.076	0.0703462	-0.032	not sig	1	0.002
F26G1.1	MSTRG.4089	NA	chrII:4793736-4793907	A3SS	soma	0.00796871	-0.086	0.0717624	-0.06	Sperm Enriched	0.000381815	-0.025
rsp-7	MSTRG.5681	NA	chrII:10659786-10660208	A3SS	soma	0.00682721	-0.089	0.0758492	-0.056	not sig	0.399247	-0.003
unc-16	MSTRG.8629	NA	chrIII:9552573-9552912	A3SS	soma	0.000219692	-0.176	0.0772889	-0.043	Oocyte Enriched	7.34241e-13	0.161
cit-1.2;F44B9.5	MSTRG.8225	NA	chrIII:8013119-8013774	A3SS	soma	7.07268e-07	-0.302	0.0774939	-0.111	Oocyte Enriched	9.87665e-09	0.274
pdk-1	MSTRG.22438	NA	chrX:1326072-1326129	A3SS	soma	2.23241e-08	-0.482	0.077633	-0.167	not sig	1	0.865
erm-1	MSTRG.881	NA	chrI:5286101-5286458	A3SS	soma	0	-0.285	0.0783352	-0.047	Oocyte Enriched	0	0.328
wnk-1	MSTRG.12565	wnk-1	chrIV:9211243-9212235	A3SS	soma	1.5923e-12	-0.43	0.0783352	-0.099	Oocyte Enriched	0	0.357
sms-1	MSTRG.13226	NA	chrIV:11485359-11485842	A3SS	soma	0.001371	0.024	0.0797691	0.012	not sig	1	-0.002
ceh-44	MSTRG.7066	NA	chrIII:2541732-2543026	A3SS	soma	0.00317576	-0.356	0.0800979	-0.091	not sig	0.10932	0.203
Y43F8B.24	MSTRG.21914	NA	chrV:19457804-19458070	A3SS	soma	7.82361e-06	0.075	0.0800995	0.022	not sig	1	0.383
rilp-1	MSTRG.7240	NA	chrIII:3643157-3643875	A3SS	soma	0.00660774	-0.129	0.0810719	-0.089	Oocyte Enriched	1.28406e-11	0.369
flap-1	MSTRG.7973	NA	chrIII:6924799-6925043	A3SS	soma	4.46977e-07	-0.079	0.0813824	0.039	Oocyte Enriched	3.19444e-06	0.021
crh-1	MSTRG.9065	NA	chrIII:11691292-11691508	A3SS	soma	2.22365e-10	-0.402	0.0818917	-0.082	Oocyte Enriched	6.46072e-07	0.213
F44E2.7	MSTRG.8451	NA	chrIII:8846827-8847409	A3SS	soma	0.00184772	-0.083	0.0819098	-0.06	Oocyte Enriched	6.1869e-09	0.068
hir-1	MSTRG.18177	NA	chrV:5527960-5528636	A3SS	soma	0.0148426	-0.073	0.0823258	0.07	not sig	1	-0.008
fem-1	MSTRG.10933	NA	chrIV:5537401-5537455	A3SS	soma	0.000902736	-0.051	0.0893963	-0.039	Oocyte Enriched	3.70801e-14	0.051
zen-4	MSTRG.11513	zen-4	chrIV:6119003-6119309	A3SS	soma	0.0154367	-0.123	0.0921848	-0.118	Oocyte Enriched	0	0.324
hpo-11	MSTRG.1352	NA	chrI:7145451-7145596	A3SS	soma	1.18102e-07	-0.28	0.0930878	-0.085	Oocyte Enriched	3.29556e-05	0.108
mdt-30	MSTRG.8229	NA	chrIII:8026382-8026577	A3SS	soma	0.0274179	-0.044	0.0983871	-0.035	not sig	0.125643	0.026
npp-15	MSTRG.8203	NA	chrIII:7929178-7929291	A3SS	soma	8.62491e-05	-0.078	0.0989584	-0.047	Oocyte Enriched	0	0.092
npl-4.1	MSTRG.4353	NA	chrII:5633043-5633296	A3SS	soma	3.51616e-09	-0.264	0.0998111	-0.091	Oocyte Enriched	0	0.342
wdr-48	MSTRG.7442	NA	chrIII:4580830-4580987	A3SS	soma	0.0139638	-0.163	0.100448	-0.142	Oocyte Enriched	0	0.411
M04B2.7	MSTRG.13239	NA	chrIV:11531925-11532035	A3SS	soma	0.000285423	-0.268	0.100919	-0.09	not sig	NA	NA
pde-1	MSTRG.2681	NA	chrI:13311544-13311684	A3SS	soma	0.0210322	0.238	0.103693	0.196	not sig	1	-0.531
max-2	MSTRG.6236	NA	chrII:13025038-13025241	A3SS	soma	1.05952e-05	-0.29	0.105923	-0.104	Oocyte Enriched	0	0.399
Y67H2A.10	MSTRG.13699	NA	chrIV:13288836-13288908	A3SS	soma	0.0138778	-0.266	0.106899	-0.198	Oocyte Enriched	0	0.221
eor-2	MSTRG.25646	eor-2	chrX:14604010-14604439	A3SS	soma	0.00275789	-0.457	0.106899	-0.146	not sig	1	0.874
R10E11.6	MSTRG.8691	NA	chrIII:9784934-9785440	A3SS	soma	9.43812e-05	-0.172	0.107159	-0.09	Oocyte Enriched	0	0.295
F45F2.10	MSTRG.18936	NA	chrV:8514344-8514871	A3SS	soma	0.000169044	-0.226	0.108851	-0.209	Oocyte Enriched	0	0.216
cup-5	MSTRG.8127	NA	chrIII:7586096-7586380	A3SS	soma	4.95657e-07	-0.234	0.110968	-0.098	Oocyte Enriched	2.9073e-13	0.232
pdk-1	MSTRG.22438	NA	chrX:1325068-1325162	A3SS	soma	4.82803e-14	-0.543	0.110968	-0.167	not sig	1	0.597
F44E2.3	MSTRG.8448	NA	chrIII:8827779-8828135	A3SS	soma	2.56991e-05	-0.032	0.116217	-0.014	not sig	1	0.006
epn-1	MSTRG.25705	epn-1	chrX:14817238-14817625	A3SS	soma	0	-0.498	0.116264	-0.08	Oocyte Enriched	0	0.398
Y39E4B.6	MSTRG.9273	Y39E4B.6	chrIII:13073401-13074697	A3SS	soma	6.14247e-06	-0.099	0.116264	0.041	not sig	1	-0.015
T16G1.9	MSTRG.20333	NA	chrV:12948745-12949188	A3SS	soma	1.2352e-12	-0.35	0.118592	-0.066	Oocyte Enriched	0.000154845	0.174
cyk-3	MSTRG.7780	cyk-3	chrIII:6022332-6022583	A3SS	soma	0.023963	-0.122	0.118755	-0.076	Oocyte Enriched	0	0.312
Y48C3A.12	MSTRG.6288	NA	chrII:13388467-13389760	A3SS	soma	0.00756686	-0.165	0.120796	-0.13	Oocyte Enriched	6.9897e-14	0.314
brf-1	MSTRG.4839	NA	chrII:7307042-7307136	A3SS	soma	0.0289498	-0.144	0.12333	-0.138	Oocyte Enriched	3.10427e-05	0.106
ugt-5	MSTRG.20286	NA	chrV:12791640-12791940	A3SS	soma	0.000179538	-0.066	0.12333	0.028	not sig	NA	NA
wnk-1	MSTRG.12565	wnk-1	chrIV:9208075-9208516	A3SS	soma	0.00103046	-0.257	0.128569	-0.107	Oocyte Enriched	0	0.429
T26A5.6	MSTRG.7870	NA	chrIII:6449578-6449734	A3SS	soma	0.00159067	-0.148	0.132354	-0.104	Oocyte Enriched	6.67917e-11	0.194
K02C4.3	MSTRG.5037	K02C4.3	chrII:8081832-8082045	A3SS	soma	0.0111554	-0.103	0.13284	-0.099	Oocyte Enriched	0	0.274
C53A5.6	MSTRG.20772	NA	chrV:14544861-14545480	A3SS	soma	0.000983189	-0.175	0.133004	-0.125	Oocyte Enriched	0	0.325
dnj-5	MSTRG.4722	NA	chrII:6854040-6854149	A3SS	soma	0.0220854	-0.138	0.133952	-0.117	Oocyte Enriched	0	0.372
hlh-11	MSTRG.8653	NA	chrIII:9623829-9624053	A3SS	soma	1.4592e-09	-0.165	0.140596	-0.054	not sig	1	-0.043
sin-3;sod-2	MSTRG.1600	sin-3	chrI:8422853-8422946	A3SS	soma	6.16365e-10	-0.207	0.141309	-0.077	Oocyte Enriched	0	0.133
fbxa-34	MSTRG.6843	NA	chrIII:1282694-1283053	A3SS	soma	0.0229689	-0.217	0.141435	-0.162	not sig	1	0.5
T01H3.2	MSTRG.4992	NA	chrII:7874960-7875061	A3SS	soma	1.93112e-06	-0.103	0.146426	-0.04	not sig	0.097706	0.014
C34H4.5;Y41D4B.18	MSTRG.9652	NA	chrIV:1558837-1559122	A3SS	soma	0.003402	0.223	0.14728	0.211	not sig	NA	NA
sut-2	MSTRG.17988	NA	chrV:4562854-4562942	A3SS	soma	0.0467299	-0.183	0.14763	-0.137	Oocyte Enriched	0	0.169
ooc-3	MSTRG.5892	ooc-3	chrII:11494996-11495094	A3SS	soma	0.0014567	-0.166	0.148211	-0.101	Oocyte Enriched	0	0.17
scpl-3	MSTRG.680	NA	chrI:4297940-4298726	A3SS	soma	6.94645e-06	-0.454	0.155831	0.302	not sig	NA	NA
ain-2	MSTRG.751	NA	chrI:4657205-4657427	A3SS	soma	0	-0.425	0.157504	-0.056	Oocyte Enriched	0	0.25
spat-1	MSTRG.6488	NA	chrII:14531141-14531457	A3SS	soma	0.00090909	-0.201	0.162072	-0.104	Oocyte Enriched	0	0.442
imph-1	MSTRG.7436	NA	chrIII:4554565-4554690	A3SS	soma	0.0378654	-0.137	0.164336	-0.109	Oocyte Enriched	1.5084e-09	0.112
ZK418.6	MSTRG.8012	NA	chrIII:7077353-7077578	A3SS	soma	0	-0.466	0.165278	-0.027	not sig	1	0.494
C48E7.1	MSTRG.1130	NA	chrI:6261404-6261509	A3SS	soma	0	-0.084	0.168061	0.008	not sig	NA	NA
gly-3	MSTRG.8197	NA	chrIII:7914991-7915147	A3SS	soma	3.82215e-11	-0.269	0.169127	-0.065	Oocyte Enriched	0	0.438
nhr-12	MSTRG.19354	NA	chrV:10082414-10082694	A3SS	soma	9.4065e-05	-0.186	0.169476	-0.102	not sig	1	0.173
rabx-5	MSTRG.8885	NA	chrIII:10609999-10610556	A3SS	soma	0.00358405	-0.125	0.171062	-0.079	Oocyte Enriched	0	0.306
cids-2	MSTRG.1697	NA	chrI:8807289-8807381	A3SS	soma	0.0088563	-0.145	0.174884	-0.102	Oocyte Enriched	0	0.347
cid-1	MSTRG.7600	NA	chrIII:5175155-5175469	A3SS	soma	0.000295757	-0.158	0.175233	0.094	Oocyte Enriched	1.03938e-10	0.054
swsn-1	MSTRG.22073	swsn-1	chrV:20239179-20240016	A3SS	soma	0.00931067	-0.22	0.176407	-0.068	Oocyte Enriched	3.99935e-10	0.159
glb-34	MSTRG.14959	glb-34	chrIV:14572208-14572353	A3SS	soma	7.66626e-08	-0.305	0.177138	0.126	not sig	NA	NA
Y17D7C.3	MSTRG.21757	NA	chrV:18720520-18720689	A3SS	soma	1.49493e-05	-0.109	0.177298	-0.038	not sig	1	0.2
F54B3.1	MSTRG.5583	NA	chrII:10266646-10266839	A3SS	soma	6.9747e-06	-0.295	0.179721	-0.131	Oocyte Enriched	0	0.3
nhr-210	MSTRG.17291	NA	chrV:518266-518466	A3SS	soma	0	-0.239	0.181675	-0.026	not sig	NA	NA
C16E9.1	MSTRG.23807	NA	chrX:6941135-6941296	A3SS	soma	0.00135024	-0.321	0.18614	0.09	not sig	1	0.338
cls-2	MSTRG.8504	NA	chrIII:9058263-9058392	A3SS	soma	0.000133833	-0.399	0.186954	-0.186	Oocyte Enriched	0	0.42
pezo-1	MSTRG.12601	NA	chrIV:9363870-9363974	A3SS	soma	0.0145787	-0.329	0.195815	-0.119	Oocyte Enriched	1.43451e-05	0.314
mak-1	MSTRG.5216	mak-1	chrII:8746354-8746802	A3SS	soma	0.0174007	-0.055	0.196006	-0.038	not sig	1	-0.029
F01G4.5;F01G4.6	MSTRG.13131	NA	chrIV:11146990-11147136	A3SS	soma	0.0060816	-0.11	0.197616	0.047	Oocyte Enriched	1.51733e-09	0.168
acdh-11	MSTRG.8878	NA	chrIII:10568987-10569340	A3SS	soma	0.0016949	-0.032	0.199429	-0.02	Oocyte Enriched	6.5401e-13	0.09
	MSTRG.12385	NA	chrIV:8393193-8393419	A3SS	soma	0.000869879	0.261	0.200994	-0.115	not sig	1	-0.089
tlf-1	MSTRG.1670	NA	chrI:8701340-8701431	A3SS	soma	2.86266e-09	-0.314	0.202401	-0.097	Oocyte Enriched	0	0.354
F20A1.6	MSTRG.18574	NA	chrV:7024866-7025010	A3SS	soma	0.0136272	-0.123	0.204517	-0.322	not sig	NA	NA
mbk-1	MSTRG.25706	NA	chrX:14822802-14822878	A3SS	soma	7.2298e-10	-0.373	0.205358	-0.053	Oocyte Enriched	0	0.378
hlh-10	MSTRG.19141	NA	chrV:9280984-9281111	A3SS	soma	0.000381758	-0.16	0.205441	0.102	not sig	NA	NA
pqn-80	MSTRG.9204	NA	chrIII:12635800-12635860	A3SS	soma	4.5153e-06	-0.433	0.206516	-0.165	Oocyte Enriched	1.00841e-05	0.168
clh-1	MSTRG.6009	NA	chrII:11847721-11847848	A3SS	soma	2.04749e-08	-0.782	0.206516	0.144	not sig	1	0.008
igeg-1	MSTRG.10211	NA	chrIV:4564757-4564871	A3SS	soma	0.0226799	-0.167	0.207372	0.077	not sig	1	0.085
C53A5.13	MSTRG.20773	NA	chrV:14547038-14547185	A3SS	soma	0.0056841	-0.061	0.208082	0.04	not sig	NA	NA
C14B9.8	MSTRG.8256	C14B9.8	chrIII:8141376-8141824	A3SS	soma	0.00371286	-0.148	0.208315	-0.077	Oocyte Enriched	1.45868e-11	0.275
sorb-1;21ur-6056	MSTRG.13929	NA	chrIV:13769287-13769527	A3SS	soma	5.27922e-06	-0.181	0.209866	0.022	not sig	1	-0.011
alp-1	MSTRG.12484	NA	chrIV:8860007-8860198	A3SS	soma	0.00187363	-0.16	0.211113	-0.143	not sig	1	1
wwp-1	MSTRG.80	NA	chrI:539794-540008	A3SS	soma	0.00206683	-0.102	0.211947	-0.045	Oocyte Enriched	0	0.408
let-363	MSTRG.872	NA	chrI:5253194-5253379	A3SS	soma	0.000391273	-0.229	0.211947	-0.13	Oocyte Enriched	6.48297e-15	0.261
C53B4.4	MSTRG.12507	NA	chrIV:8983693-8983848	A3SS	soma	5.20803e-08	-0.321	0.211962	-0.121	Oocyte Enriched	0	0.593
T24B8.7	MSTRG.5291	NA	chrII:9049580-9049671	A3SS	soma	0.000186429	-0.423	0.213609	-0.141	Oocyte Enriched	2.80156e-11	0.186
adm-2	MSTRG.25439	adm-2	chrX:13695302-13695800	A3SS	soma	2.17573e-06	-0.259	0.215457	-0.049	Oocyte Enriched	3.18248e-13	0.376
mfn-1	MSTRG.5880	NA	chrII:11471064-11471769	A3SS	soma	0.0308943	-0.202	0.215488	-0.078	Oocyte Enriched	5.79974e-08	0.164
arle-14	MSTRG.7702	NA	chrIII:5693254-5693579	A3SS	soma	0.00660597	-0.101	0.216696	-0.065	Oocyte Enriched	0	0.253
C34D10.2	MSTRG.24124	NA	chrX:8024551-8024664	A3SS	soma	0	-0.441	0.217081	0.08	not sig	1	-0.037
T13C2.6	MSTRG.4707	NA	chrII:6787391-6788270	A3SS	soma	0.00262925	-0.075	0.218079	-0.044	Oocyte Enriched	0	0.247
par-3	MSTRG.7697	NA	chrIII:5673118-5673380	A3SS	soma	0.000120545	-0.278	0.219453	-0.08	Oocyte Enriched	0	0.368
bet-1	MSTRG.723	NA	chrI:4529871-4530009	A3SS	soma	0	-0.442	0.219843	-0.074	Oocyte Enriched	0	0.112
odr-4	MSTRG.7926	NA	chrIII:6732162-6732359	A3SS	soma	0.0390216	-0.226	0.219843	0.157	not sig	0.413886	-0.115
fbxa-34	MSTRG.6843	NA	chrIII:1282694-1283331	A3SS	soma	0.0152441	-0.233	0.220297	-0.127	not sig	1	0.4
pms-2;nhr-101	MSTRG.19884	NA	chrV:11572163-11572336	A3SS	soma	0	-0.374	0.223977	-0.011	not sig	1	0.062
skpt-1	MSTRG.7646	skpt-1	chrIII:5448039-5448121	A3SS	soma	0.0253755	-0.088	0.228629	-0.065	Oocyte Enriched	0	0.357
set-1	MSTRG.7870	NA	chrIII:6451578-6451774	A3SS	soma	0.0246338	-0.035	0.230452	-0.028	Oocyte Enriched	0	0.153
ncl-1	MSTRG.8154	ncl-1	chrIII:7732032-7732410	A3SS	soma	3.7969e-05	-0.356	0.232736	-0.076	Oocyte Enriched	0	0.399
crh-2	MSTRG.4174	NA	chrII:5187311-5187407	A3SS	soma	0.00974476	-0.068	0.233504	-0.036	Oocyte Enriched	0	0.135
sftd-3	MSTRG.5269	NA	chrII:8963882-8963987	A3SS	soma	0.0446162	-0.028	0.233956	-0.024	Oocyte Enriched	1.88484e-13	0.046
ppm-2	MSTRG.7463	ppm-2	chrIII:4652887-4653053	A3SS	soma	0.0391892	-0.113	0.235613	-0.089	Oocyte Enriched	0.000129699	0.035
vbh-1	MSTRG.471	NA	chrI:3161642-3161702	A3SS	soma	1.0879e-06	-0.191	0.237684	-0.061	Oocyte Enriched	0	0.305
Y51H4A.5	MSTRG.16619	NA	chrIV:16524575-16524755	A3SS	soma	0.000244908	-0.046	0.244977	0.021	not sig	NA	NA
nck-1	MSTRG.23070	NA	chrX:4150095-4150266	A3SS	soma	1.64282e-05	-0.186	0.247344	-0.064	not sig	1	0.485
tbc-9	MSTRG.13746	tbc-9	chrIV:13477992-13478115	A3SS	soma	0.000127018	-0.254	0.2508	-0.076	Oocyte Enriched	0	0.307
nep-14	MSTRG.24200	NA	chrX:8376971-8377063	A3SS	soma	0.00116497	-0.114	0.250813	0.037	not sig	NA	NA
apx-1	MSTRG.17747	NA	chrV:3220710-3220883	A3SS	soma	0.0330937	-0.084	0.25244	-0.074	Oocyte Enriched	1.16273e-10	0.111
acs-22	MSTRG.24361	NA	chrX:8934556-8934730	A3SS	soma	0.0139382	-0.047	0.256002	0.032	not sig	NA	NA
egrh-3	MSTRG.9825	NA	chrIV:2680097-2680447	A3SS	soma	0.0262334	0.069	0.258819	0.046	not sig	0.320232	0.011
sra-37	MSTRG.25480	NA	chrX:13891273-13891479	A3SS	soma	3.40955e-06	-0.427	0.265776	-0.084	not sig	NA	NA
trpp-8	MSTRG.962	NA	chrI:5614436-5614690	A3SS	soma	0.0112947	-0.28	0.265778	-0.147	Oocyte Enriched	1.28326e-09	0.247
epg-4	MSTRG.8044	epg-4	chrIII:7183660-7184186	A3SS	soma	5.02015e-11	-0.214	0.265866	-0.048	Oocyte Enriched	1.47381e-07	0.149
mut-16	MSTRG.2042	NA	chrI:10083197-10083264	A3SS	soma	1.32037e-08	-0.303	0.267108	-0.12	Oocyte Enriched	0	0.144
szy-20	MSTRG.5274	NA	chrII:8969158-8969235	A3SS	soma	0.00208467	-0.251	0.270166	-0.153	Oocyte Enriched	3.62997e-07	0.205
clh-3	MSTRG.4822	NA	chrII:7221031-7221232	A3SS	soma	2.40475e-05	-0.283	0.27091	-0.077	not sig	1	0.24
tra-2	MSTRG.4752	tra-2	chrII:6962761-6962854	A3SS	soma	0.00701461	-0.249	0.271365	-0.096	Oocyte Enriched	0	0.429
trxr-1	MSTRG.11993	NA	chrIV:7014059-7014345	A3SS	soma	0.000478992	-0.044	0.272753	-0.019	Oocyte Enriched	0	0.046
csn-6	MSTRG.13700	NA	chrIV:13302936-13303066	A3SS	soma	1.14861e-12	-0.342	0.274402	-0.076	Oocyte Enriched	0	0.425
kap-1	MSTRG.8078	NA	chrIII:7339124-7339207	A3SS	soma	0.0111066	-0.049	0.274854	-0.034	not sig	1	-0.163
C53B4.4	MSTRG.12507	NA	chrIV:8983947-8984706	A3SS	soma	2.38542e-09	-0.362	0.276769	-0.092	Oocyte Enriched	0	0.397
bath-44	MSTRG.4857	NA	chrII:7396337-7396473	A3SS	soma	0.00869757	-0.063	0.276992	-0.032	Oocyte Enriched	2.31996e-12	0.066
etr-1	MSTRG.3016	etr-1	chrII:168542-168689	A3SS	soma	0	-0.558	0.281049	-0.042	Oocyte Enriched	0.00290176	0.24
cup-16	MSTRG.5205	cup-16	chrII:8707935-8708478	A3SS	soma	2.98864e-11	-0.054	0.281932	0.008	not sig	1	0.038
parg-1	MSTRG.12463	NA	chrIV:8747765-8747936	A3SS	soma	0.00638732	-0.233	0.283025	-0.075	not sig	0.0697297	0.038
T08G11.4	MSTRG.1718	NA	chrI:8904534-8904817	A3SS	soma	0.0279082	-0.014	0.284649	-0.01	not sig	0.245058	0.007
aak-2	MSTRG.26125	NA	chrX:16801382-16801590	A3SS	soma	7.46806e-11	-0.269	0.286001	-0.024	Oocyte Enriched	7.91661e-14	0.475
csnk-1	MSTRG.2079	NA	chrI:10230276-10230440	A3SS	soma	1.58906e-05	-0.198	0.287289	-0.044	Oocyte Enriched	8.74983e-15	0.179
srw-85	MSTRG.21906	NA	chrV:19430028-19430625	A3SS	soma	0.0300361	0.068	0.288161	0.067	not sig	NA	NA
F59E12.16	MSTRG.4354	NA	chrII:5630126-5630259	A3SS	soma	4.24974e-08	-0.448	0.288939	-0.118	not sig	NA	NA
T05E12.3	MSTRG.21325	NA	chrV:17077733-17077844	A3SS	soma	0.00132792	-0.039	0.288939	-0.01	not sig	NA	NA
gfi-2	MSTRG.1957	eat-16	chrI:9742967-9743109	A3SS	soma	1.7155e-09	-0.208	0.290487	-0.041	Oocyte Enriched	0	0.401
nepr-1	MSTRG.1595	NA	chrI:8399252-8399320	A3SS	soma	0	-0.284	0.290785	-0.048	Oocyte Enriched	0	0.113
F56H11.2	MSTRG.12658	F56H11.2	chrIV:9531857-9532258	A3SS	soma	0.0356602	0.033	0.296612	0.029	not sig	NA	NA
parg-1	MSTRG.12463	NA	chrIV:8748127-8748271	A3SS	soma	6.24125e-06	-0.148	0.297347	-0.102	Oocyte Enriched	4.54648e-05	0.087
sipa-1	MSTRG.19902	NA	chrV:11632319-11632467	A3SS	soma	1.24231e-09	-0.349	0.297591	0.068	not sig	1	0.235
abu-8;C03A7.13	MSTRG.18112	abu-8	chrV:5179460-5179648	A3SS	soma	0.0130134	-0.324	0.305338	-0.196	not sig	NA	NA
soc-1	MSTRG.17996	NA	chrV:4646674-4646931	A3SS	soma	3.88074e-06	-0.173	0.308044	-0.024	not sig	1	0.548
tlf-1	MSTRG.1670	NA	chrI:8701716-8701843	A3SS	soma	3.09888e-08	-0.283	0.310675	-0.075	Oocyte Enriched	0	0.211
lin-13	MSTRG.8151	NA	chrIII:7709166-7709348	A3SS	soma	0.0156244	-0.219	0.311531	-0.156	Oocyte Enriched	0	0.135
Y51A2D.13	MSTRG.21718	NA	chrV:18573055-18573841	A3SS	soma	0.0197974	-0.012	0.311989	0.005	not sig	1	-0.016
hgap-2	MSTRG.5198	NA	chrII:8673616-8673729	A3SS	soma	0	-0.602	0.312822	-0.067	Oocyte Enriched	0	0.482
let-363	MSTRG.872	NA	chrI:5259295-5259858	A3SS	soma	2.7864e-10	-0.454	0.317929	-0.108	Oocyte Enriched	0	0.399
F40A3.2	MSTRG.18783	NA	chrV:7881199-7881403	A3SS	soma	0.0114773	0.12	0.32035	-0.051	not sig	1	0.003
nhr-71	MSTRG.25456	NA	chrX:13748579-13748697	A3SS	soma	1.21615e-08	-0.458	0.322484	-0.124	not sig	1	0.654
Y59C2A.2	MSTRG.3532	NA	chrII:2199642-2199884	A3SS	soma	0.0286864	0.108	0.32553	0.078	not sig	0.498085	-0.044
F27D4.1;lsy-22	MSTRG.1463	NA	chrI:7704564-7705466	A3SS	soma	0.000138158	-0.197	0.327186	-0.074	Oocyte Enriched	0	0.251
Y106G6H.6	MSTRG.2117	NA	chrI:10445217-10445415	A3SS	soma	0.0450359	-0.044	0.330412	-0.029	Oocyte Enriched	2.72208e-10	0.104
C25H3.10	MSTRG.4371	NA	chrII:5697605-5698740	A3SS	soma	0.000598134	-0.007	0.330412	0.003	not sig	1	-0.176
egl-18	MSTRG.9697	NA	chrIV:1914684-1914930	A3SS	soma	0.00308995	-0.094	0.333692	-0.034	not sig	1	0.272
F55A12.5	MSTRG.899	NA	chrI:5347318-5347540	A3SS	soma	1.28477e-05	-0.187	0.335332	-0.093	Oocyte Enriched	0	0.354
K07H8.2	MSTRG.12359	NA	chrIV:8292764-8292879	A3SS	soma	8.77799e-05	-0.148	0.339312	-0.054	Oocyte Enriched	0	0.423
papl-1	MSTRG.20273	NA	chrV:12759618-12759767	A3SS	soma	0.0112608	-0.21	0.344037	0.07	not sig	NA	NA
cpna-2;B0228.10	MSTRG.4953	cpna-2	chrII:7730954-7750409	A3SS	soma	0.0330127	0.353	0.346567	-0.2	not sig	1	-0.016
lin-66	MSTRG.14101	lin-66	chrIV:13890671-13890819	A3SS	soma	0.0305407	-0.269	0.347054	-0.118	not sig	0.630036	0.343
Y73F8A.24	MSTRG.15874	NA	chrIV:15449093-15449208	A3SS	soma	0.0457636	-0.149	0.347369	-0.112	Oocyte Enriched	0.00208372	0.088
ire-1;unc-105	MSTRG.5046	NA	chrII:8121772-8121974	A3SS	soma	0.0466234	-0.253	0.34823	-0.176	not sig	1	-0.261
egl-27	MSTRG.4718	NA	chrII:6840682-6840910	A3SS	soma	0.00442105	-0.271	0.350048	-0.131	not sig	1	0.007
sax-2	MSTRG.7591	NA	chrIII:5118611-5118736	A3SS	soma	0	-0.846	0.351355	-0.138	Oocyte Enriched	9.11568e-13	0.397
nhr-274	MSTRG.9667	nhr-274	chrIV:1641582-1641922	A3SS	soma	0.0152406	-0.106	0.353865	0.023	not sig	0.0522586	0.029
F22G12.5	MSTRG.2648	F22G12.5	chrI:13168321-13168707	A3SS	soma	0.00122364	-0.704	0.355436	-0.21	Oocyte Enriched	1.09602e-11	0.246
frpr-13	MSTRG.19044	NA	chrV:8900947-8901142	A3SS	soma	5.39354e-05	-0.45	0.356245	0.15	not sig	1	0.256
F17C11.6	MSTRG.19654	NA	chrV:10955398-10955456	A3SS	soma	0.0125313	0.023	0.357735	0.015	not sig	1	-0.109
lin-13	MSTRG.8151	NA	chrIII:7707358-7707711	A3SS	soma	0.048588	-0.049	0.35878	-0.051	not sig	1	0.002
madf-3	MSTRG.3991	NA	chrII:4337063-4337151	A3SS	soma	3.02745e-06	-0.166	0.359848	-0.064	Oocyte Enriched	3.15017e-14	0.13
chhy-1	MSTRG.5185	NA	chrII:8616063-8616322	A3SS	soma	1.04362e-11	-0.403	0.364646	0.034	not sig	NA	NA
F52H2.6	MSTRG.22711	NA	chrX:2562013-2562276	A3SS	soma	7.76992e-05	-0.286	0.368163	0.061	not sig	1	0.01
F49E7.2	MSTRG.22408	NA	chrX:1096068-1096141	A3SS	soma	8.25565e-07	-0.084	0.368163	-0.023	not sig	NA	NA
F46H5.7	MSTRG.23893	F46H5.7	chrX:7240628-7240757	A3SS	soma	0	-0.477	0.369019	-0.012	not sig	1	-0.004
ubr-4	MSTRG.741	ubr-4	chrI:4626464-4627206	A3SS	soma	6.40721e-06	-0.364	0.375906	-0.128	Oocyte Enriched	1.04783e-14	0.19
C05G5.2	MSTRG.25684	C05G5.2	chrX:14750006-14750238	A3SS	soma	5.85491e-08	-0.541	0.37966	-0.097	not sig	1	0.596
wnk-1	MSTRG.12565	wnk-1	chrIV:9203708-9204151	A3SS	soma	0.0255897	-0.229	0.383922	-0.113	Oocyte Enriched	3.37534e-12	0.289
scd-1	MSTRG.25194	NA	chrX:12506880-12507014	A3SS	soma	0.0105302	-0.121	0.385247	-0.043	not sig	1	0.042
Y43F8B.23	MSTRG.21915	NA	chrV:19466447-19466547	A3SS	soma	0.00160289	-0.18	0.386863	-0.059	not sig	NA	NA
ntl-4	MSTRG.12261	NA	chrIV:7912868-7913157	A3SS	soma	1.10242e-08	-0.356	0.388519	-0.067	Oocyte Enriched	0	0.232
F55G1.7	MSTRG.12140	F55G1.7	chrIV:7467933-7468227	A3SS	soma	0.0207736	-0.196	0.388913	-0.135	Oocyte Enriched	1.69985e-07	0.4
F22E12.3	MSTRG.19465	NA	chrV:10460237-10460334	A3SS	soma	0.00138616	-0.27	0.396005	-0.178	not sig	NA	NA
D2005.4	MSTRG.1480	NA	chrI:7815247-7815317	A3SS	soma	0.0385114	-0.111	0.396061	-0.093	not sig	0.90791	-0.003
ufl-1;C06G3.3	MSTRG.11997	NA	chrIV:7036233-7036447	A3SS	soma	0	-0.261	0.396858	-0.011	not sig	NA	NA
lid-1	MSTRG.2074	lid-1	chrI:10192025-10192128	A3SS	soma	0	-0.214	0.402964	-0.045	Oocyte Enriched	0	0.506
unc-43	MSTRG.12918	NA	chrIV:10329096-10329201	A3SS	soma	1.68415e-07	-0.247	0.40809	0.182	not sig	0.138037	0.058
nra-2;rps-19	MSTRG.1924	NA	chrI:9621498-9622090	A3SS	soma	1.17686e-10	-0.213	0.408254	-0.049	Oocyte Enriched	0	0.422
F52H2.6	MSTRG.22711	NA	chrX:2562013-2562258	A3SS	soma	0.00142141	-0.188	0.410179	-0.033	not sig	1	-0.068
mlcd-1;idhg-1	MSTRG.7439	NA	chrIII:4567660-4567788	A3SS	soma	2.42971e-10	-0.103	0.410398	0.013	Oocyte Enriched	2.20588e-10	0.093
T08A11.1	MSTRG.7360	NA	chrIII:4250747-4251010	A3SS	soma	0.00120627	-0.454	0.41489	-0.17	Oocyte Enriched	0	0.255
2019-04-01	MSTRG.1532	NA	chrI:8052481-8054035	A3SS	soma	0.0103467	-0.168	0.417474	-0.078	Oocyte Enriched	0	0.451
odr-4	MSTRG.7926	NA	chrIII:6733178-6733343	A3SS	soma	6.20303e-09	-0.265	0.424235	-0.052	Oocyte Enriched	0	0.216
lmd-3	MSTRG.18918	NA	chrV:8429199-8429369	A3SS	soma	0.00269346	-0.203	0.424235	-0.053	Oocyte Enriched	0	0.371
cka-1	MSTRG.12715	NA	chrIV:9732783-9732900	A3SS	soma	0	-0.521	0.426217	-0.056	Oocyte Enriched	0	0.41
ash-2	MSTRG.6045	ash-2	chrII:11983000-11983123	A3SS	soma	0	-0.4	0.4276	-0.095	Oocyte Enriched	0	0.482
Y37E11B.2;Y37E11B.16;Y37E11B.1	MSTRG.9988	Y37E11B.2	chrIV:3578793-3578960	A3SS	soma	5.63598e-05	-0.343	0.4276	-0.138	not sig	1	-0.127
npl-4.2	MSTRG.4353	NA	chrII:5624562-5625076	A3SS	soma	0.00103011	-0.108	0.430024	-0.039	Oocyte Enriched	0	0.337
ogt-1	MSTRG.8037	NA	chrIII:7153373-7153547	A3SS	soma	0.038119	-0.08	0.430118	-0.033	Oocyte Enriched	1.96318e-14	0.271
Y69A2AR.1	MSTRG.9821	Y69A2AR.1	chrIV:2667355-2667502	A3SS	soma	3.01825e-08	-0.211	0.434979	-0.047	Oocyte Enriched	0	0.319
esyt-2	MSTRG.7825	NA	chrIII:6225716-6225850	A3SS	soma	0	-0.35	0.438507	-0.041	Oocyte Enriched	2.10412e-11	0.466
hrpk-1	MSTRG.1145	NA	chrI:6318361-6318664	A3SS	soma	0.0490046	-0.056	0.438507	-0.025	Sperm Enriched	0.00341111	-0.023
Y17G7B.18	MSTRG.6058	Y17G7B.18	chrII:12107294-12107535	A3SS	soma	1.8133e-07	-0.318	0.440833	-0.06	Oocyte Enriched	1.86082e-13	0.219
klp-12	MSTRG.13183	NA	chrIV:11355996-11356723	A3SS	soma	0.0160127	-0.052	0.445804	-0.027	Oocyte Enriched	4.92838e-09	0.041
usp-50	MSTRG.21348	usp-50	chrV:17928540-17928653	A3SS	soma	0.0413794	0.128	0.449208	-0.107	Sperm Enriched	1.06193e-07	0.298
C18D4.8	MSTRG.21596	NA	chrV:17546525-17546618	A3SS	soma	0.00297772	-0.083	0.453882	0.067	not sig	NA	NA
nucb-1	MSTRG.24671	NA	chrX:10199796-10199846	A3SS	soma	1.34189e-05	-0.215	0.455866	-0.03	Oocyte Enriched	0.0016995	0.097
nos-3	MSTRG.5467	nos-3	chrII:9748424-9749305	A3SS	soma	0.00106593	-0.176	0.455909	-0.062	Oocyte Enriched	0	0.217
K08B12.3;K08B12.4	MSTRG.18365	NA	chrV:6236730-6236970	A3SS	soma	3.84625e-07	-0.255	0.455909	-0.079	not sig	1	-0.02
sup-37	MSTRG.19014	NA	chrV:8788193-8788678	A3SS	soma	0.00258528	-0.31	0.456666	-0.088	Oocyte Enriched	6.04276e-10	0.396
szy-20	MSTRG.5274	NA	chrII:8967392-8968012	A3SS	soma	0.0106509	-0.175	0.456667	-0.085	Oocyte Enriched	0	0.29
nhr-92	MSTRG.9660	NA	chrIV:1620314-1620406	A3SS	soma	0.0293137	-0.05	0.456667	0.018	not sig	NA	NA
parg-1	MSTRG.12463	NA	chrIV:8748211-8748271	A3SS	soma	1.90697e-05	-0.099	0.457676	0.095	Oocyte Enriched	6.6647e-05	0.05
Y53C10A.1	MSTRG.2439	NA	chrI:11966458-11966572	A3SS	soma	0.016419	-0.066	0.458268	-0.019	not sig	1	0.005
F13A2.2;F13A2.10	MSTRG.17960	NA	chrV:4385165-4386013	A3SS	soma	0.00597874	-0.545	0.458268	-0.329	not sig	NA	NA
csn-3	MSTRG.9422	NA	chrIV:196839-197109	A3SS	soma	0.0402386	-0.018	0.458738	-0.015	Oocyte Enriched	8.23103e-05	0.019
R107.2	MSTRG.8503	NA	chrIII:9043873-9044167	A3SS	soma	1.79897e-07	-0.241	0.460667	-0.042	not sig	0.475525	0.077
cyp-33E2	MSTRG.12427	NA	chrIV:8612699-8612796	A3SS	soma	0.000335539	-0.078	0.460667	-0.017	not sig	1	0.051
rrf-3	MSTRG.5059	rrf-3	chrII:8165046-8165325	A3SS	soma	0.0202204	-0.081	0.462446	-0.06	Oocyte Enriched	0.000201784	0.024
rog-1	MSTRG.3286	NA	chrII:1372920-1373059	A3SS	soma	0.0075555	-0.242	0.463894	-0.112	Oocyte Enriched	0	0.424
tmd-2	MSTRG.18899	NA	chrV:8339009-8341131	A3SS	soma	0.0492719	-0.063	0.464423	0.058	not sig	1	-0.055
F23B12.4;F23B12.10	MSTRG.20735	NA	chrV:14443229-14443381	A3SS	soma	0.0153409	-0.06	0.467508	-0.017	not sig	1	-0.094
F38A5.2	MSTRG.11852	NA	chrIV:6584908-6585136	A3SS	soma	6.45535e-06	-0.197	0.469534	-0.06	Oocyte Enriched	0	0.292
eif-3.G	MSTRG.5135	NA	chrII:8442840-8442899	A3SS	soma	0.0467299	-0.078	0.469866	0.034	Oocyte Enriched	0	0.352
C53B4.4	MSTRG.12507	NA	chrIV:8981694-8982083	A3SS	soma	0.00354524	-0.214	0.4716	-0.096	Oocyte Enriched	0	0.322
eri-9	MSTRG.7548	NA	chrIII:4933375-4933770	A3SS	soma	0.00226823	-0.236	0.472566	-0.092	Oocyte Enriched	0	0.481
W01A11.7	MSTRG.18442	moc-2	chrV:6505244-6505389	A3SS	soma	0.00661314	-0.133	0.472566	-0.029	not sig	1	-0.844
unc-62	MSTRG.17981	NA	chrV:4503956-4504230	A3SS	soma	0.045892	-0.048	0.475351	-0.018	not sig	1	-0.008
Y48E1C.1	MSTRG.6290	NA	chrII:13416027-13419259	A3SS	soma	0.00843794	-0.032	0.475356	0.007	Sperm Enriched	0.000201681	-0.021
C06A6.2	MSTRG.12244	NA	chrIV:7853070-7853320	A3SS	soma	0.0285832	-0.154	0.47751	0.079	not sig	1	0.109
piki-1	MSTRG.25810	NA	chrX:15241661-15241786	A3SS	soma	8.51548e-06	-0.741	0.478682	-0.132	Oocyte Enriched	5.90583e-15	0.675
dli-1	MSTRG.13658	dli-1	chrIV:13097578-13097829	A3SS	soma	0.000983189	-0.301	0.482012	-0.059	Oocyte Enriched	0	0.314
cbp-1	MSTRG.8687	NA	chrIII:9773330-9773633	A3SS	soma	0.0380366	-0.123	0.484076	0.046	not sig	0.266563	0.02
Y97E10AR.4;lmtr-2	MSTRG.18820	NA	chrV:8010112-8010826	A3SS	soma	2.02073e-06	-0.079	0.48658	-0.015	Oocyte Enriched	0	0.176
F26H9.2	MSTRG.1805	NA	chrI:9290550-9290674	A3SS	soma	0.0206327	-0.116	0.488093	-0.084	Oocyte Enriched	2.10764e-10	0.096
R10E4.6	MSTRG.7366	NA	chrIII:4293833-4293968	A3SS	soma	2.35074e-11	-0.356	0.488984	-0.047	not sig	1	0.002
F22B5.5	MSTRG.5140	NA	chrII:8453827-8453966	A3SS	soma	2.99794e-10	0.871	0.48914	0.247	not sig	1	0.192
ifg-1	MSTRG.5082	NA	chrII:8217344-8217438	A3SS	soma	4.02497e-07	-0.193	0.489783	-0.048	Oocyte Enriched	0	0.069
tbc-1	MSTRG.25735	NA	chrX:14974132-14974404	A3SS	soma	1.93276e-06	-0.227	0.489783	-0.036	Oocyte Enriched	3.16712e-12	0.38
crh-1	MSTRG.9065	NA	chrIII:11688125-11688336	A3SS	soma	0	-0.443	0.494178	-0.03	Oocyte Enriched	8.54211e-09	0.303
nucb-1	MSTRG.24671	NA	chrX:10199763-10199846	A3SS	soma	1.16515e-10	0.214	0.496136	-0.048	Oocyte Enriched	1.84269e-09	-0.118
F17H10.2	MSTRG.25294	NA	chrX:13114156-13114251	A3SS	soma	1.40122e-08	-0.19	0.496903	-0.026	not sig	NA	NA
M03C11.3	MSTRG.8845	NA	chrIII:10408361-10408597	A3SS	soma	5.7173e-06	-0.302	0.498796	-0.101	Oocyte Enriched	5.37776e-12	0.182
tlk-1	MSTRG.8670	NA	chrIII:9707248-9708688	A3SS	soma	0.00445326	-0.15	0.499467	-0.071	not sig	1	0.009
pqn-27	MSTRG.6293	NA	chrII:13454862-13454979	A3SS	soma	0.0198526	-0.117	0.500442	-0.039	Oocyte Enriched	0	0.308
C49F8.1	MSTRG.25364	NA	chrX:13364101-13364191	A3SS	soma	3.01963e-09	-0.102	0.501109	0.01	not sig	NA	NA
pdf-1	MSTRG.7972	pdf-1	chrIII:6910962-6911066	A3SS	soma	3.39425e-15	-0.092	0.507553	0.018	not sig	1	-0.144
F58D5.2	MSTRG.2465	NA	chrI:12066204-12066337	A3SS	soma	0.0391892	-0.113	0.510803	-0.046	Sperm Enriched	8.70636e-08	-0.29
ekl-4;yars-1	MSTRG.2877	ekl-4	chrI:14476344-14476790	A3SS	soma	3.39425e-15	-0.263	0.512283	-0.059	Oocyte Enriched	0	0.236
set-29	MSTRG.188	NA	chrI:1412598-1413106	A3SS	soma	0.00722904	-0.049	0.512283	-0.022	not sig	1	-0.005
pig-1	MSTRG.9473	pig-1	chrIV:513757-514185	A3SS	soma	0.0427623	-0.103	0.512301	-0.061	Oocyte Enriched	6.08039e-06	0.096
natc-1	MSTRG.18926	NA	chrV:8464540-8464850	A3SS	soma	0.000394815	-0.232	0.513522	-0.067	Oocyte Enriched	0	0.409
ubr-4	MSTRG.741	ubr-4	chrI:4612025-4613022	A3SS	soma	0.00128157	-0.226	0.513522	-0.06	Oocyte Enriched	0	0.304
Y45G5AL.1	MSTRG.17923	NA	chrV:4144760-4144929	A3SS	soma	0.0016847	-0.205	0.513933	-0.053	Oocyte Enriched	0	0.512
pot-1	MSTRG.8027	NA	chrIII:7133354-7133502	A3SS	soma	0.0013962	-0.023	0.513933	0.01	Oocyte Enriched	0.0172692	0.02
R11D1.1	MSTRG.20256	istr-1	chrV:12707188-12707243	A3SS	soma	2.59371e-07	-0.112	0.517924	-0.033	Oocyte Enriched	0.0127839	0.057
srb-18	MSTRG.18687	NA	chrV:7516905-7517098	A3SS	soma	2.56427e-05	-0.464	0.517924	-0.188	not sig	1	-0.25
glb-20	MSTRG.25408	NA	chrX:13553085-13553293	A3SS	soma	0.0168172	-0.18	0.517924	0.11	not sig	NA	NA
sax-3	MSTRG.22917	NA	chrX:3452617-3452939	A3SS	soma	5.14426e-08	-0.343	0.518152	-0.051	Oocyte Enriched	0	0.686
Y37E11B.2;Y37E11B.16;Y37E11B.1	MSTRG.9988	Y37E11B.2	chrIV:3578785-3578960	A3SS	soma	0.0138824	-0.244	0.51967	-0.115	not sig	1	0.039
Y54G2A.11	MSTRG.9835	NA	chrIV:2770668-2771118	A3SS	soma	0	-0.218	0.52318	0.006	not sig	1	-0.056
T21C9.6	MSTRG.19509	NA	chrV:10583231-10583302	A3SS	soma	0.00359381	-0.105	0.528185	0.017	not sig	1	-0.04
nhr-11	MSTRG.12526	NA	chrIV:9070678-9070753	A3SS	soma	0.0147425	-0.127	0.528185	-0.054	not sig	1	0.492
tag-343	MSTRG.26098	NA	chrX:16665796-16665932	A3SS	soma	0.00250988	-0.128	0.537433	0.067	not sig	1	0.059
eri-12	MSTRG.13416	NA	chrIV:12162807-12162873	A3SS	soma	0	-0.415	0.538006	-0.014	Oocyte Enriched	0	0.601
mon-2	MSTRG.13400	NA	chrIV:12104582-12104779	A3SS	soma	1.87257e-07	-0.415	0.538006	0.109	Oocyte Enriched	0	0.471
rme-4	MSTRG.24713	NA	chrX:10374570-10374743	A3SS	soma	0	-0.712	0.539533	-0.043	not sig	1	0.598
M4.1	MSTRG.9917	NA	chrIV:3214506-3214681	A3SS	soma	1.70268e-05	-0.248	0.539839	-0.048	Oocyte Enriched	0	0.35
trak-1	MSTRG.1087	trak-1	chrI:6125644-6125719	A3SS	soma	0	-0.413	0.539839	-0.027	Oocyte Enriched	0.00109191	0.256
AC3.5	MSTRG.19451	NA	chrV:10391246-10391519	A3SS	soma	4.69702e-05	-0.049	0.539839	-0.01	not sig	NA	NA
dmsr-16;T27B2.2	MSTRG.18525	NA	chrV:6808674-6808815	A3SS	soma	0.00515268	0.423	0.546379	0.223	not sig	NA	NA
kel-3	MSTRG.9334	kel-3	chrIII:13466960-13467035	A3SS	soma	0.0207249	-0.081	0.549158	-0.029	Oocyte Enriched	0.000334114	0.118
nhr-136	MSTRG.20046	NA	chrV:12108648-12108770	A3SS	soma	0.0130134	-0.035	0.551308	0.019	not sig	NA	NA
sorf-1	MSTRG.22900	NA	chrX:3378041-3378105	A3SS	soma	0.000613514	-0.084	0.555917	-0.018	not sig	1	0.015
F26F2.7	MSTRG.22155	F26F2.7	chrV:20582073-20582176	A3SS	soma	3.32177e-06	-0.321	0.556154	0.085	Oocyte Enriched	0	0.341
grl-16	MSTRG.85	grl-16	chrI:573639-574073	A3SS	soma	0.0197221	0.149	0.557514	0.06	not sig	NA	NA
twk-29	MSTRG.1854	twk-29	chrI:9467432-9468123	A3SS	soma	0.0155232	0.037	0.558254	-0.01	not sig	NA	NA
eri-12	MSTRG.13416	NA	chrIV:12162287-12162419	A3SS	soma	1.61398e-08	-0.086	0.558288	-0.011	Oocyte Enriched	0.0118975	0.025
mdt-30	MSTRG.8229	NA	chrIII:8027353-8027522	A3SS	soma	5.58622e-07	-0.255	0.561835	-0.072	Oocyte Enriched	0	0.215
Y48C3A.5;ztf-22	MSTRG.6280	NA	chrII:13281096-13281513	A3SS	soma	2.28891e-12	-0.44	0.5696	-0.062	not sig	1	0.508
cyp-33E1	MSTRG.12438	NA	chrIV:8645902-8646579	A3SS	soma	7.73616e-06	0.496	0.570099	-0.009	not sig	1	0.174
ubr-4	MSTRG.741	ubr-4	chrI:4629945-4630047	A3SS	soma	0.0134994	-0.373	0.570283	-0.147	Oocyte Enriched	0	0.44
zfp-3	MSTRG.22458	zfp-3	chrX:1442493-1442635	A3SS	soma	0	-0.739	0.570283	-0.076	not sig	1	0.784
ZC196.1	MSTRG.19002	NA	chrV:8742716-8742866	A3SS	soma	0.0180397	-0.325	0.570385	-0.145	not sig	NA	NA
atx-2	MSTRG.8854	atx-2	chrIII:10467303-10468051	A3SS	soma	0	-0.454	0.5733	-0.034	Oocyte Enriched	0	0.179
ppk-3	MSTRG.25272	NA	chrX:12975389-12975515	A3SS	soma	1.07431e-07	-0.539	0.5733	0.084	not sig	1	0.575
R04A9.3	MSTRG.22276	NA	chrX:378439-378509	A3SS	soma	0.0166729	-0.048	0.575898	0.023	not sig	NA	NA
dur-1	MSTRG.12781	NA	chrIV:9926284-9927064	A3SS	soma	1.58029e-06	0.377	0.578399	0.068	not sig	NA	NA
nhr-135	MSTRG.18595	NA	chrV:7093247-7093344	A3SS	soma	0.00173513	-0.079	0.578495	-0.023	not sig	1	0.086
cyp-33E1	MSTRG.12438	NA	chrIV:8645902-8646051	A3SS	soma	0.000121893	-0.058	0.578845	-0.014	not sig	1	0.25
frm-9	MSTRG.24803	plc-1	chrX:10823113-10823305	A3SS	soma	0.000125652	0.551	0.589371	0.244	not sig	NA	NA
dcp-66	MSTRG.1433	NA	chrI:7539174-7539259	A3SS	soma	0	-0.371	0.589372	-0.044	Oocyte Enriched	0	0.279
C55A6.10	MSTRG.19861	NA	chrV:11506870-11507151	A3SS	soma	0.0316362	-0.151	0.589372	0.055	Oocyte Enriched	0	0.321
tnt-3	MSTRG.24108	NA	chrX:7937990-7938062	A3SS	soma	0.0145787	-0.097	0.591124	0.003	not sig	1	-0.037
F16A11.1	MSTRG.1833	NA	chrI:9398330-9398411	A3SS	soma	0.0205678	-0.161	0.591212	-0.046	not sig	1	-0.018
R04A9.3	MSTRG.22276	NA	chrX:378439-378592	A3SS	soma	0.00452753	-0.138	0.599402	-0.081	not sig	1	0.593
rsp-5	MSTRG.4610	rsp-5	chrII:6490719-6491065	A3SS	soma	0.0395638	0.026	0.601298	0.01	not sig	0.511219	-0.002
mrck-1	MSTRG.18373	NA	chrV:6258776-6258935	A3SS	soma	0.0133519	-0.111	0.601485	-0.039	Oocyte Enriched	2.41103e-06	0.175
F54B3.1	MSTRG.5583	NA	chrII:10263063-10263581	A3SS	soma	0.0168479	-0.213	0.60973	-0.123	Oocyte Enriched	7.50284e-06	0.335
F52H2.6	MSTRG.22711	NA	chrX:2562013-2562267	A3SS	soma	4.93132e-05	-0.199	0.610263	-0.024	not sig	1	-0.208
rbm-25	MSTRG.20205	NA	chrV:12500262-12501375	A3SS	soma	0.00484872	-0.201	0.612443	0.147	not sig	1	0.063
cul-2	MSTRG.9373	NA	chrIII:13691609-13691708	A3SS	soma	1.07494e-06	-0.268	0.613243	-0.042	Oocyte Enriched	0	0.377
lron-4	MSTRG.5041	NA	chrII:8109074-8109169	A3SS	soma	0.00169434	-0.297	0.616687	-0.022	not sig	1	0.216
T13C2.6	MSTRG.4707	NA	chrII:6783867-6784017	A3SS	soma	1.79191e-11	-0.23	0.618235	-0.021	Oocyte Enriched	3.70008e-09	0.173
sax-2	MSTRG.7591	NA	chrIII:5118432-5118565	A3SS	soma	3.98596e-06	-0.324	0.618235	-0.072	not sig	0.0564647	0.121
nhr-136;C13C4.4	MSTRG.20046	NA	chrV:12108822-12109324	A3SS	soma	0.000119735	0.083	0.618235	-0.021	not sig	1	0.5
nhr-144	MSTRG.19063	NA	chrV:8976490-8976860	A3SS	soma	0.0200146	-0.077	0.621044	-0.031	not sig	NA	NA
bed-1	MSTRG.21821	NA	chrV:19121802-19121934	A3SS	soma	3.11148e-09	-0.496	0.624677	0.062	Oocyte Enriched	1.99882e-07	0.114
tep-1	MSTRG.2949	NA	chrI:14996736-14996834	A3SS	soma	4.463e-08	-0.149	0.624677	-0.016	not sig	1	0.167
linc-84;F55H12.9;F55H12.2	MSTRG.1713	NA	chrI:8865852-8868437	A3SS	soma	2.87874e-07	-0.463	0.629296	-0.068	not sig	NA	NA
lpin-1	MSTRG.20520	NA	chrV:13652324-13652543	A3SS	soma	0.00187086	-0.026	0.632034	-0.059	Oocyte Enriched	6.09553e-16	0.086
F16B4.5	MSTRG.17443	NA	chrV:1591398-1591538	A3SS	soma	0.000478992	-0.354	0.632034	0.068	not sig	1	-0.174
let-767	MSTRG.7854	NA	chrIII:6338979-6339108	A3SS	soma	0	-0.224	0.634133	-0.006	Oocyte Enriched	0	0.11
gcst-1	MSTRG.18233	NA	chrV:5713351-5713964	A3SS	soma	6.23046e-05	-0.048	0.634618	-0.008	Oocyte Enriched	3.31418e-05	0.063
cdk-12	MSTRG.7376	NA	chrIII:4336220-4336353	A3SS	soma	0.00349448	-0.253	0.635777	-0.107	Oocyte Enriched	3.56569e-15	0.127
F16B4.5	MSTRG.17443	NA	chrV:1589879-1591538	A3SS	soma	0.000553624	0.286	0.637314	0.065	not sig	0.276989	-0.137
	MSTRG.2060	NA	chrI:10149919-10150121	A3SS	soma	0.0237899	0.1	0.63964	0.046	not sig	1	1
cil-1	MSTRG.8260	NA	chrIII:8160256-8160514	A3SS	soma	2.20699e-07	-0.193	0.640346	-0.049	Oocyte Enriched	0	0.581
M03A1.3	MSTRG.4028	NA	chrII:4559303-4559696	A3SS	soma	0.0217592	-0.172	0.644632	-0.117	not sig	NA	NA
ces-2	MSTRG.2946	NA	chrI:14964721-14965361	A3SS	soma	0.0278712	-0.03	0.647684	-0.026	not sig	NA	NA
spat-2	MSTRG.8961	NA	chrIII:11057277-11057395	A3SS	soma	2.10028e-05	-0.251	0.649419	-0.056	Oocyte Enriched	0	0.349
M01A8.1;clip-1	MSTRG.8556	NA	chrIII:9259855-9260222	A3SS	soma	0	-0.742	0.650241	-0.037	not sig	1	-0.08
R05D3.12	MSTRG.8329	NA	chrIII:8385641-8385736	A3SS	soma	0.000164874	-0.083	0.650788	-0.02	Oocyte Enriched	0.000332216	0.039
saps-1	MSTRG.5841	NA	chrII:11298256-11298397	A3SS	soma	0.0124988	-0.209	0.654377	-0.091	Oocyte Enriched	0	0.524
acl-7	MSTRG.6192	acl-7	chrII:12812069-12812379	A3SS	soma	0.000712217	-0.052	0.65767	0.013	not sig	1	-0.001
tbc-11	MSTRG.22383	NA	chrX:929148-929345	A3SS	soma	0	-0.54	0.658822	0.027	Oocyte Enriched	0.0413138	0.21
abu-8;C03A7.13	MSTRG.18112	abu-8	chrV:5191843-5192300	A3SS	soma	0.00316233	-0.101	0.665047	-0.031	not sig	NA	NA
nhr-86	MSTRG.17534	nhr-86	chrV:2062237-2062517	A3SS	soma	0.0116738	-0.12	0.665302	-0.046	not sig	0.195352	0.05
Y17D7B.7	MSTRG.21762	NA	chrV:18781005-18781055	A3SS	soma	1.34514e-07	-0.217	0.678099	0.041	not sig	NA	NA
pbo-5	MSTRG.22221	pbo-5	chrV:20917452-20917621	A3SS	soma	0.0176388	0.12	0.678099	0.068	not sig	NA	NA
par-4	MSTRG.21373	NA	chrV:18101697-18101964	A3SS	soma	0.0151584	-0.118	0.679111	-0.014	Oocyte Enriched	0	0.134
C09B8.4	MSTRG.23553	NA	chrX:6019332-6019434	A3SS	soma	0.0157683	0.088	0.685036	0.053	not sig	1	-0.04
Y38F2AR.3	MSTRG.9766	Y38F2AR.3	chrIV:2386722-2386801	A3SS	soma	0.0167331	-0.054	0.685036	-0.019	not sig	1	0.006
H05C05.1	MSTRG.7126	NA	chrIII:2958226-2958862	A3SS	soma	1.06729e-08	-0.472	0.687079	-0.039	Oocyte Enriched	0	0.373
tag-340	MSTRG.7537	NA	chrIII:4902048-4902457	A3SS	soma	2.68431e-05	-0.181	0.689286	-0.054	Oocyte Enriched	0	0.331
T23B5.4	MSTRG.13560	NA	chrIV:12675713-12675830	A3SS	soma	0.000690762	-0.069	0.69453	-0.015	Oocyte Enriched	0.00640001	0.042
nhr-21	MSTRG.4846	NA	chrII:7348317-7348430	A3SS	soma	0	-0.403	0.69453	0.023	not sig	1	0.161
tag-52	MSTRG.22951	NA	chrX:3674040-3675971	A3SS	soma	8.24791e-05	-0.054	0.69453	-0.011	not sig	1	-0.994
frpr-7	MSTRG.26250	NA	chrX:17569029-17569132	A3SS	soma	2.57308e-06	-0.599	0.705916	0.193	not sig	NA	NA
wdr-48	MSTRG.7442	NA	chrIII:4581404-4581790	A3SS	soma	0.0106393	-0.122	0.706902	-0.051	Oocyte Enriched	0	0.327
acs-22	MSTRG.24361	NA	chrX:8938600-8938704	A3SS	soma	0	-0.181	0.7088	0.004	not sig	1	0.056
nepr-1	MSTRG.1595	NA	chrI:8399369-8399509	A3SS	soma	4.27353e-10	-0.169	0.712803	-0.027	Oocyte Enriched	6.09553e-16	0.133
brf-1	MSTRG.4839	NA	chrII:7307050-7307136	A3SS	soma	0.0264267	-0.264	0.712803	-0.078	Oocyte Enriched	0.0401525	0.245
golg-4	MSTRG.7207	NA	chrIII:3416791-3416891	A3SS	soma	0.0256281	-0.097	0.712803	-0.024	not sig	0.669776	0.029
spr-4	MSTRG.1540	spr-4	chrI:8108726-8109227	A3SS	soma	0.00036997	-0.278	0.715898	-0.06	Oocyte Enriched	0	0.453
hlh-11	MSTRG.8653	NA	chrIII:9623824-9624053	A3SS	soma	8.80255e-11	-0.551	0.715898	-0.065	not sig	1	-0.03
T28F3.5;ifta-2	MSTRG.17110	T28F3.5	chrIV:17300216-17300812	A3SS	soma	0.000161501	0.357	0.715898	-0.188	not sig	1	0.204
C34F11.8	MSTRG.4220	NA	chrII:5210027-5210263	A3SS	soma	0.020181	-0.081	0.715898	-0.024	not sig	1	-0.068
F07H5.6	MSTRG.5228	NA	chrII:8792070-8792226	A3SS	soma	0.00252217	-0.201	0.716935	0.025	not sig	NA	NA
C08B6.2	MSTRG.19362	NA	chrV:10105731-10106192	A3SS	soma	0.00901648	-0.212	0.722873	-0.108	not sig	NA	NA
C17H11.6	MSTRG.24156	NA	chrX:8190167-8190319	A3SS	soma	1.34002e-08	-0.17	0.7247	0.002	not sig	1	0.419
C54G4.5;C54G4.4	MSTRG.1518	NA	chrI:7996482-7996736	A3SS	soma	3.72649e-07	-0.23	0.730151	-0.026	Oocyte Enriched	9.74357e-05	0.22
fln-1	MSTRG.9449	fln-1	chrIV:363770-363879	A3SS	soma	0	-0.41	0.734117	0.035	Oocyte Enriched	0.00100616	0.074
fbxa-59	MSTRG.6763	NA	chrIII:941135-941757	A3SS	soma	0.0188621	-0.081	0.736079	-0.023	not sig	1	0.093
rgs-7	MSTRG.22923	NA	chrX:3556430-3556573	A3SS	soma	1.68424e-12	-0.334	0.739844	-0.025	not sig	1	0.232
C37E2.2	MSTRG.25553	NA	chrX:14176391-14176469	A3SS	soma	0.00511224	-0.39	0.744897	-0.039	not sig	NA	NA
ddb-1	MSTRG.13403	NA	chrIV:12120856-12121013	A3SS	soma	0.0226006	-0.024	0.745431	-0.009	not sig	0.960867	0
W09H1.1	MSTRG.6265	NA	chrII:13176727-13176842	A3SS	soma	0.00260906	-0.455	0.749562	0.091	not sig	1	-0.25
ZK1098.2	MSTRG.8623	NA	chrIII:9529369-9529490	A3SS	soma	0.00871921	-0.047	0.753766	-0.016	Oocyte Enriched	2.99014e-15	0.055
bli-4;K04F10.8;K04F10.9	MSTRG.1151	NA	chrI:6346972-6354044	A3SS	soma	0.000323783	-0.11	0.760427	-0.006	Sperm Enriched	0	-0.029
F53F4.14;H37A05.2	MSTRG.20519	NA	chrV:13629797-13629950	A3SS	soma	0.000422734	-0.244	0.761408	-0.047	not sig	1	-0.106
npr-14;nhr-85	MSTRG.2619	npr-14	chrI:13056556-13057475	A3SS	soma	0.00484872	-0.077	0.764441	0.009	not sig	1	-1
hpo-11	MSTRG.1352	NA	chrI:7141607-7142014	A3SS	soma	1.2191e-12	-0.514	0.76928	-0.047	Oocyte Enriched	0	0.249
usp-50	MSTRG.21348	usp-50	chrV:17928542-17928653	A3SS	soma	0.000103178	-0.503	0.781632	0.008	Oocyte Enriched	0.0121762	0.269
pqn-20	MSTRG.1263	NA	chrI:6796007-6796141	A3SS	soma	0.00108809	-0.233	0.782601	-0.062	Oocyte Enriched	0	0.444
taf-4	MSTRG.56	NA	chrI:386068-386336	A3SS	soma	0.00295983	-0.101	0.782601	-0.017	Oocyte Enriched	5.48784e-06	0.063
tat-5	MSTRG.1795	NA	chrI:9240899-9241059	A3SS	soma	0.0109783	-0.217	0.792338	0.031	Oocyte Enriched	2.14409e-09	0.097
ash-2	MSTRG.6045	ash-2	chrII:11980765-11981096	A3SS	soma	2.78499e-05	-0.26	0.793095	-0.045	Oocyte Enriched	0	0.511
ZC487.1	MSTRG.18506	NA	chrV:6729095-6729204	A3SS	soma	0.0339817	-0.183	0.796796	-0.048	not sig	1	0.045
F58H1.7	MSTRG.20005	F58H1.7	chrV:11964264-11964396	A3SS	soma	0	-0.32	0.798643	-0.023	not sig	1	0.186
daf-15	MSTRG.12609	daf-15	chrIV:9391268-9391448	A3SS	soma	0.000242178	-0.226	0.80384	-0.066	Oocyte Enriched	0	0.499
R01B10.4	MSTRG.18331	NA	chrV:6046869-6047292	A3SS	soma	2.82206e-09	-0.243	0.813238	-0.025	Oocyte Enriched	6.49091e-09	0.297
crh-2	MSTRG.4174	NA	chrII:5183956-5184114	A3SS	soma	7.27751e-14	-0.361	0.81473	-0.03	Oocyte Enriched	0	0.307
smp-1	MSTRG.2922	NA	chrI:14812410-14812559	A3SS	soma	0.0295805	-0.143	0.81473	-0.039	Oocyte Enriched	0	0.518
F17E5.2	MSTRG.25175	NA	chrX:12396668-12396905	A3SS	soma	0.000188095	-0.358	0.81473	0.02	not sig	1	0.518
pals-18	MSTRG.6877	NA	chrIII:1404993-1405332	A3SS	soma	0.00011356	0.061	0.817899	0.01	not sig	1	0.137
nhr-21	MSTRG.4846	NA	chrII:7347570-7347751	A3SS	soma	4.22068e-14	-0.086	0.818415	-0.013	not sig	1	-0.064
lst-6	MSTRG.4765	NA	chrII:7018614-7018814	A3SS	soma	0.00226823	-0.267	0.824075	0.066	Oocyte Enriched	8.74983e-15	0.323
parg-1	MSTRG.12463	NA	chrIV:8748203-8748271	A3SS	soma	6.98195e-06	-0.149	0.824075	-0.071	Oocyte Enriched	6.09955e-05	0.078
F48E8.4	MSTRG.7649	NA	chrIII:5454976-5455387	A3SS	soma	0.00182226	-0.053	0.825957	0.012	Oocyte Enriched	5.54004e-07	0.039
unc-23	MSTRG.19053	unc-23	chrV:8937392-8938152	A3SS	soma	0.00760674	-0.048	0.825957	0.008	not sig	0.708527	0.055
glb-16	MSTRG.23987	NA	chrX:7538309-7538441	A3SS	soma	0.00143383	-0.165	0.828033	-0.063	not sig	NA	NA
nra-4	MSTRG.17362	nra-4	chrV:1048270-1048412	A3SS	soma	0	-0.503	0.830307	0.04	Oocyte Enriched	0	0.451
tat-3	MSTRG.8906	NA	chrIII:10722146-10722594	A3SS	soma	0.036759	-0.057	0.833627	0.016	Oocyte Enriched	0	0.103
let-607;try-6	MSTRG.1212	NA	chrI:6584268-6585418	A3SS	soma	0.000961202	-0.195	0.833627	-0.029	Oocyte Enriched	2.78511e-11	0.195
npp-21	MSTRG.4923	NA	chrII:7606270-7606536	A3SS	soma	8.4388e-06	-0.165	0.834142	-0.033	Oocyte Enriched	0	0.209
F14D7.6	MSTRG.20697	NA	chrV:14305837-14306202	A3SS	soma	1.59027e-12	-0.488	0.843166	0.085	not sig	NA	NA
nmt-1	MSTRG.7795	NA	chrIII:6116035-6116174	A3SS	soma	0.0123537	-0.128	0.855563	-0.025	Oocyte Enriched	4.55938e-12	0.204
gsp-4;T03F1.6	MSTRG.589	gsp-4	chrI:3839808-3840096	A3SS	soma	2.73611e-08	-0.23	0.855563	0.04	not sig	1	0.065
fbxa-34	MSTRG.6843	NA	chrIII:1282694-1282864	A3SS	soma	0.0229689	-0.214	0.855563	-0.056	not sig	NA	NA
D2007.1;atg-13	MSTRG.8258	NA	chrIII:8155852-8155989	A3SS	soma	0	-0.079	0.856188	-0.006	not sig	1	0
Y53F4B.12	MSTRG.6578	NA	chrII:15021931-15022504	A3SS	soma	2.03059e-08	-0.677	0.86207	-0.303	not sig	NA	NA
C14B9.8	MSTRG.8256	C14B9.8	chrIII:8141868-8142029	A3SS	soma	0.000328812	-0.234	0.862364	-0.043	Oocyte Enriched	0	0.549
sulp-7	MSTRG.24875	NA	chrX:11081018-11081186	A3SS	soma	3.14698e-07	-0.676	0.862364	-0.025	not sig	1	-0.002
linc-37;K02F3.15;zip-2	MSTRG.6736	NA	chrIII:833114-834174	A3SS	soma	0.000131159	-0.187	0.862364	0.04	not sig	1	0.088
magu-1	MSTRG.6682	NA	chrIII:469506-469700	A3SS	soma	0.00561161	-0.337	0.866604	-0.088	not sig	0.0601595	0.135
D1086.11	MSTRG.20638	NA	chrV:14076145-14076725	A3SS	soma	0	0.31	0.866604	-0.013	not sig	0.50909	0.011
hecd-1	MSTRG.12038	NA	chrIV:7140800-7141067	A3SS	soma	8.18858e-06	-0.257	0.867443	-0.027	Oocyte Enriched	0.000658358	0.086
mdt-15	MSTRG.7735	NA	chrIII:5832293-5832784	A3SS	soma	0.0293376	-0.14	0.868353	0.026	not sig	0.516191	0.038
C36E8.1	MSTRG.7306	NA	chrIII:4000711-4000816	A3SS	soma	0.0218326	-0.03	0.872005	-0.007	Oocyte Enriched	9.8795e-05	0.023
pqn-37	MSTRG.22859	NA	chrX:3248749-3249017	A3SS	soma	4.06503e-06	-0.545	0.872005	-0.034	not sig	1	-0.467
rmh-2	MSTRG.19319	rmh-2	chrV:9929745-9930201	A3SS	soma	0.0113139	-0.135	0.872005	0.041	not sig	1	0.01
pag-3	MSTRG.25729	NA	chrX:14953954-14954052	A3SS	soma	0.0171469	-0.435	0.880097	0.09	not sig	NA	NA
eat-17	MSTRG.26049	NA	chrX:16407735-16407951	A3SS	soma	1.67272e-05	-0.547	0.880876	0.074	not sig	1	0.431
pms-2;nhr-101	MSTRG.19884	NA	chrV:11571999-11572121	A3SS	soma	0	-0.344	0.882838	0.008	not sig	1	-0.069
E01G4.3	MSTRG.6293	NA	chrII:13465338-13465413	A3SS	soma	0.00318379	0.38	0.882838	-0.09	not sig	NA	NA
flcn-1	MSTRG.4747	NA	chrII:6944725-6944848	A3SS	soma	0.00185584	-0.066	0.884876	0.024	Oocyte Enriched	0	0.29
mel-11	MSTRG.5361	NA	chrII:9363209-9363355	A3SS	soma	5.13381e-13	-0.483	0.885771	-0.028	Oocyte Enriched	0	0.262
faah-6	MSTRG.9064	NA	chrIII:11655931-11656385	A3SS	soma	2.06737e-10	-0.802	0.88591	0.021	not sig	NA	NA
parg-1	MSTRG.12463	NA	chrIV:8748217-8748271	A3SS	soma	1.55208e-05	-0.146	0.897003	0.028	Oocyte Enriched	0.000129145	0.058
tag-18	MSTRG.22965	tag-18	chrX:3732876-3732970	A3SS	soma	0.000237584	-0.038	0.897003	0.004	not sig	1	0
T24B8.7	MSTRG.5291	NA	chrII:9048468-9048694	A3SS	soma	3.92352e-06	-0.321	0.900124	0.042	Oocyte Enriched	9.93233e-09	0.071
anr-35;F37H8.2	MSTRG.5812	NA	chrII:11172847-11173020	A3SS	soma	2.56647e-07	-0.498	0.900124	0.017	not sig	1	0.151
B0495.8	MSTRG.4945	NA	chrII:7706780-7707193	A3SS	soma	0.0385763	0.028	0.908839	0.007	not sig	0.38345	0.003
srh-2	MSTRG.17321	NA	chrV:733732-733960	A3SS	soma	0.0234469	0.262	0.908839	0.074	not sig	NA	NA
F02A9.1	MSTRG.8507	NA	chrIII:9076725-9077186	A3SS	soma	0.0295805	-0.096	0.909658	0.031	not sig	NA	NA
B0546.3	MSTRG.9954	otub-4	chrIV:3381774-3381988	A3SS	soma	0.0121546	-0.246	0.911489	-0.022	Oocyte Enriched	1.44621e-05	0.216
dve-1	MSTRG.22286	dve-1	chrX:427820-427999	A3SS	soma	2.5928e-07	-0.256	0.911833	0.032	not sig	1	-0.369
C53C7.5	MSTRG.25284	NA	chrX:13043819-13043881	A3SS	soma	4.82185e-06	-0.049	0.911833	0.005	not sig	1	0.068
C06E1.7	MSTRG.8389	C06E1.7	chrIII:8592013-8592120	A3SS	soma	0.00160402	-0.353	0.911833	-0.07	not sig	1	-0.039
gopc-1	MSTRG.2831	NA	chrI:14188019-14188130	A3SS	soma	0.00846741	-0.252	0.911833	0.073	not sig	NA	NA
K08D8.7	MSTRG.13602	NA	chrIV:12897099-12897227	A3SS	soma	0.0355895	-0.134	0.911833	-0.014	not sig	NA	NA
unc-94	MSTRG.1050	NA	chrI:5998577-5998664	A3SS	soma	4.96975e-08	-0.245	0.912873	-0.032	not sig	0.485623	0.071
nas-9	MSTRG.18046	nas-9	chrV:4837840-4837977	A3SS	soma	0.000202825	-0.235	0.913064	-0.05	not sig	1	-0.053
par-4	MSTRG.21373	NA	chrV:18101700-18101964	A3SS	soma	0.0066802	-0.257	0.913328	0.035	Oocyte Enriched	1.75103e-06	0.284
cln-3.3	MSTRG.18992	cln-3.3	chrV:8685207-8685371	A3SS	soma	6.28509e-06	-0.19	0.918047	-0.02	not sig	NA	NA
R11A8.1	MSTRG.12922	R11A8.1	chrIV:10356776-10356869	A3SS	soma	0.0353053	0.037	0.919121	-0.015	not sig	1	0.006
rfp-1	MSTRG.8326	NA	chrIII:8359969-8360596	A3SS	soma	0.000164249	-0.18	0.920758	-0.029	Oocyte Enriched	1.0138e-06	0.064
pals-19	MSTRG.6877	NA	chrIII:1402343-1402473	A3SS	soma	0.0380366	-0.084	0.921601	0.02	not sig	1	-0.427
T10G3.1	MSTRG.20474	NA	chrV:13469689-13469803	A3SS	soma	3.29248e-05	-0.075	0.926678	0.005	not sig	NA	NA
F49E2.1	MSTRG.24513	NA	chrX:9563252-9563321	A3SS	soma	1.30001e-05	-0.176	0.932182	-0.021	not sig	1	0.012
F28C1.3	MSTRG.20193	NA	chrV:12471153-12471334	A3SS	soma	0.00764839	-0.194	0.933928	-0.053	not sig	0.891213	0.1
C27A7.3	MSTRG.20058	NA	chrV:12143418-12143571	A3SS	soma	0.0369969	0.198	0.933928	-0.026	not sig	NA	NA
C04F12.1	MSTRG.1943	C04F12.1	chrI:9674025-9674323	A3SS	soma	0.000127018	-0.236	0.946532	0.032	Oocyte Enriched	2.05945e-05	0.348
fln-1	MSTRG.9449	fln-1	chrIV:373961-374530	A3SS	soma	7.33887e-07	-0.323	0.947684	-0.039	Oocyte Enriched	0	0.142
sec-24.2	MSTRG.13475	sec-24.2	chrIV:12358392-12359011	A3SS	soma	0.0438605	-0.046	0.947684	-0.015	Oocyte Enriched	6.09553e-16	0.167
zhp-2	MSTRG.1614	NA	chrI:8486809-8486898	A3SS	soma	0.00666493	0.056	0.954554	-0.017	Sperm Enriched	9.63188e-08	0.032
F34H10.2	MSTRG.24529	NA	chrX:9630402-9630483	A3SS	soma	0.000135699	-0.323	0.95867	-0.051	not sig	NA	NA
ZK896.4	MSTRG.13598	NA	chrIV:12882550-12882709	A3SS	soma	0.000432066	-0.064	0.95867	0.002	not sig	NA	NA
elt-3	MSTRG.25494	elt-3	chrX:13939322-13939431	A3SS	soma	3.0269e-06	-0.278	0.960436	0.039	not sig	1	0.086
F32B5.6	MSTRG.376	NA	chrI:2669630-2669747	A3SS	soma	0.0292779	-0.074	0.960436	0.018	not sig	1	-0.03
tbc-14	MSTRG.6291	NA	chrII:13445023-13445256	A3SS	soma	0	-0.554	0.96197	-0.012	Oocyte Enriched	1.21391e-15	0.362
D1086.10	MSTRG.20640	D1086.10	chrV:14083276-14083393	A3SS	soma	0	-0.024	0.96197	0.001	not sig	NA	NA
tag-77	MSTRG.12409	NA	chrIV:8503492-8503977	A3SS	soma	0.0385974	-0.158	0.962322	-0.024	Oocyte Enriched	1.06167e-06	0.218
sec-15	MSTRG.24335	NA	chrX:8833633-8833761	A3SS	soma	0.00172971	-0.183	0.964143	-0.03	Oocyte Enriched	0	0.731
dip-2	MSTRG.812	NA	chrI:4943863-4944395	A3SS	soma	3.7969e-05	-0.25	0.964143	0	Oocyte Enriched	8.10907e-07	0.282
ZK1010.4	MSTRG.9254	ZK1010.4	chrIII:12982547-12982673	A3SS	soma	0.00224836	-0.091	0.967962	0.013	not sig	1	0.478
noah-1	MSTRG.1023	noah-1	chrI:5876753-5876904	A3SS	soma	0.000422734	-0.372	0.969419	0.015	not sig	NA	NA
pis-1	MSTRG.12731	pis-1	chrIV:9796146-9796251	A3SS	soma	5.28697e-05	-0.302	0.969793	-0.045	Oocyte Enriched	4.73672e-09	0.08
F43G6.8	MSTRG.5997	NA	chrII:11813111-11813278	A3SS	soma	0.0126915	-0.021	0.969793	-0.004	not sig	1	-0.017
F54B3.1	MSTRG.5583	NA	chrII:10262875-10263024	A3SS	soma	2.97325e-06	-0.412	0.978286	0.026	Oocyte Enriched	1.43532e-10	0.122
nhr-76	MSTRG.9499	NA	chrIV:627731-628070	A3SS	soma	1.26405e-10	-0.514	0.981191	-0.031	not sig	1	-0.035
selt-1.1	MSTRG.24982	selt-1.1	chrX:11546285-11546385	A3SS	soma	0	-0.167	0.98141	-0.011	Oocyte Enriched	0.00171052	0.163
mgl-3	MSTRG.10780	mgl-3	chrIV:5448360-5448483	A3SS	soma	0.00260411	-0.409	0.988704	0.007	not sig	NA	NA
daf-15	MSTRG.12609	daf-15	chrIV:9387256-9387562	A3SS	soma	0.0245735	-0.167	0.990835	-0.037	Oocyte Enriched	0	0.339
heri-1	MSTRG.4493	NA	chrII:6112479-6112863	A3SS	soma	0.0482554	0.097	0.993686	0.007	Sperm Enriched	0.00269298	0.04
thoc-5	MSTRG.7633	NA	chrIII:5346757-5347126	A3SS	soma	0.00767371	-0.115	0.994933	-0.024	Oocyte Enriched	0	0.292
F32B4.4	MSTRG.2342	NA	chrI:11522124-11523074	A3SS	soma	0.000456724	-0.367	0.999515	0.162	Oocyte Enriched	4.2101e-06	0.113
F49D11.6	MSTRG.2242	NA	chrI:10908855-10911695	A3SS	soma	0.0011358	0.399	0.999515	0.037	not sig	NA	NA
ceh-44	MSTRG.7066	NA	chrIII:2544834-2544895	A3SS	soma	0	-0.283	1	-0.011	Oocyte Enriched	0	0.065
egl-30	MSTRG.249	NA	chrI:1839054-1839192	A3SS	soma	0	-0.208	1	-0.008	Oocyte Enriched	0	0.104
acl-14	MSTRG.19154	NA	chrV:9332760-9332931	A3SS	soma	0	-0.34	1	-0.005	Oocyte Enriched	0	0.293
mogs-1	MSTRG.13091	NA	chrIV:11018102-11018631	A3SS	soma	2.35074e-11	-0.246	1	-0.022	Oocyte Enriched	0	0.374
obr-1	MSTRG.8990	NA	chrIII:11265433-11265559	A3SS	soma	1.76779e-06	-0.168	1	-0.013	Oocyte Enriched	0	0.288
zyg-12	MSTRG.4143	NA	chrII:4951591-4952009	A3SS	soma	3.40955e-06	-0.176	1	-0.006	Oocyte Enriched	0	0.376
mel-26	MSTRG.1780	mel-26	chrI:9134974-9135094	A3SS	soma	6.37608e-06	-0.135	1	-0.008	Oocyte Enriched	0	0.216
Y54G2A.73	MSTRG.9880	NA	chrIV:3006027-3006090	A3SS	soma	5.39354e-05	0.499	1	-0.148	Sperm Enriched	0	0.564
lpin-1	MSTRG.20520	NA	chrV:13652324-13652540	A3SS	soma	6.27658e-05	-0.056	1	0.001	Oocyte Enriched	0	0.201
cyk-1	MSTRG.8000	NA	chrIII:7028040-7028108	A3SS	soma	0.00345288	-0.311	1	-0.016	Oocyte Enriched	0	0.275
cdk-12	MSTRG.7376	NA	chrIII:4334119-4334323	A3SS	soma	0.00564621	-0.202	1	0.018	Oocyte Enriched	0	0.194
R05F9.9	MSTRG.4130	NA	chrII:4901889-4901983	A3SS	soma	0.00752575	-0.07	1	-0.007	Oocyte Enriched	0	0.133
ufd-3	MSTRG.5512	C05C10.5	chrII:9941366-9942128	A3SS	soma	0.00947989	-0.109	1	-0.019	Oocyte Enriched	0	0.189
set-2	MSTRG.7546	NA	chrIII:4925686-4925746	A3SS	soma	0.00974476	-0.277	1	-0.085	Oocyte Enriched	0	0.405
gls-1	MSTRG.1681	gls-1	chrI:8741188-8741368	A3SS	soma	0.0104362	-0.178	1	-0.002	Oocyte Enriched	0	0.241
Y34D9A.3	MSTRG.152	Y34D9A.3	chrI:1039214-1039294	A3SS	soma	0.010453	-0.26	1	-0.029	Oocyte Enriched	0	0.43
T14G10.5	MSTRG.12870	NA	chrIV:10153117-10153231	A3SS	soma	0.0133424	-0.139	1	0.007	Oocyte Enriched	0	0.327
F42H10.3;ess-2	MSTRG.8357	NA	chrIII:8488343-8488819	A3SS	soma	0.0257695	-0.106	1	-0.004	Oocyte Enriched	0	0.353
C52E12.1	MSTRG.4767	NA	chrII:7027226-7027449	A3SS	soma	0.0142405	-0.195	1	0.044	Oocyte Enriched	6.09553e-16	0.264
aakg-2	MSTRG.26137	NA	chrX:16868346-16868447	A3SS	soma	1.25196e-07	-0.24	1	0	Oocyte Enriched	3.56569e-15	0.467
let-363	MSTRG.872	NA	chrI:5260423-5260636	A3SS	soma	0.0429087	-0.174	1	0.008	Oocyte Enriched	4.15131e-15	0.252
rga-8	MSTRG.23335	NA	chrX:5272397-5272681	A3SS	soma	1.32955e-11	-0.583	1	-0.012	Oocyte Enriched	1.33344e-14	0.461
edc-4	MSTRG.499	NA	chrI:3340230-3340605	A3SS	soma	1.15896e-06	-0.314	1	-0.025	Oocyte Enriched	4.54549e-14	0.358
rga-9;2RSSE.6	MSTRG.6614	NA	chrII:15273042-15274516	A3SS	soma	0.0328816	0.199	1	-0.007	Oocyte Enriched	4.14902e-13	-0.703
daf-16	MSTRG.2200	H36N01.4	chrI:10764350-10764496	A3SS	soma	0	-0.378	1	-0.007	Oocyte Enriched	2.52267e-12	0.148
zipt-3	MSTRG.4378	NA	chrII:5718654-5718733	A3SS	soma	0.00471366	-0.123	1	0.006	Oocyte Enriched	1.45872e-11	0.084
clh-3	MSTRG.4822	NA	chrII:7217992-7218484	A3SS	soma	0.00222729	-0.232	1	-0.037	Oocyte Enriched	1.48117e-11	0.335
slc-25A42	MSTRG.1644	NA	chrI:8614333-8614530	A3SS	soma	0.00886861	-0.032	1	-0.003	Oocyte Enriched	1.64866e-11	0.109
hif-1	MSTRG.22169	NA	chrV:20784135-20784392	A3SS	soma	0	-0.521	1	-0.001	Oocyte Enriched	9.86797e-10	0.442
plc-4;R05G6.18	MSTRG.12158	NA	chrIV:7511670-7512065	A3SS	soma	0.000179455	-0.152	1	-0.017	Oocyte Enriched	1.24069e-09	0.163
frm-7	MSTRG.20118	frm-7	chrV:12304643-12305377	A3SS	soma	0.00161572	-0.036	1	-0.003	Oocyte Enriched	3.78372e-09	0.081
H18N23.2	MSTRG.26258	NA	chrX:17625266-17625613	A3SS	soma	0.0286809	-0.059	1	-0.007	Oocyte Enriched	5.0501e-08	0.101
C27C12.4	MSTRG.25711	NA	chrX:14855566-14855764	A3SS	soma	1.00009e-14	-0.386	1	-0.018	Oocyte Enriched	5.0513e-08	0.439
gcy-28	MSTRG.717	NA	chrI:4502563-4502899	A3SS	soma	2.20043e-09	-0.417	1	-0.12	Oocyte Enriched	5.05322e-08	0.219
B0035.3	MSTRG.13175	NA	chrIV:11314634-11314874	A3SS	soma	0.0127061	-0.019	1	-0.001	Oocyte Enriched	4.49031e-07	0.021
trr-1	MSTRG.5949	NA	chrII:11672768-11673155	A3SS	soma	0.0199294	-0.358	1	-0.031	Oocyte Enriched	2.70529e-06	0.304
F01G12.18;eat-17	MSTRG.26049	NA	chrX:16398301-16399278	A3SS	soma	0.000821388	-0.116	1	-0.023	Oocyte Enriched	9.30621e-06	0.071
kin-10	MSTRG.1575	NA	chrI:8290240-8290432	A3SS	soma	0.00526081	0.1	1	0.01	Oocyte Enriched	9.7437e-06	-0.068
madd-3	MSTRG.25580	NA	chrX:14286106-14286203	A3SS	soma	0.0214553	-0.14	1	0.001	Oocyte Enriched	1.41166e-05	0.061
alh-8	MSTRG.5966	alh-8	chrII:11729596-11730114	A3SS	soma	0	-0.033	1	0.002	Oocyte Enriched	6.073e-05	0.016
ift-43	MSTRG.4363	NA	chrII:5660386-5660555	A3SS	soma	0.014874	-0.042	1	0.003	Oocyte Enriched	0.000113856	0.045
sop-3	MSTRG.397	NA	chrI:2765091-2765695	A3SS	soma	3.56608e-07	-0.405	1	0.025	Oocyte Enriched	0.000377292	0.13
tag-325	MSTRG.7508	NA	chrIII:4799555-4799785	A3SS	soma	0.0255378	0.063	1	0.014	Sperm Enriched	0.000527494	0.069
nhr-76	MSTRG.9499	NA	chrIV:633693-633954	A3SS	soma	3.52789e-13	-0.673	1	0.027	Oocyte Enriched	0.00337039	0.204
Y45G5AM.9;nhr-114	MSTRG.17925	NA	chrV:4188608-4188730	A3SS	soma	0	-0.305	1	0.009	Oocyte Enriched	0.00595482	0.331
shc-1	MSTRG.139	NA	chrI:969892-969993	A3SS	soma	1.83673e-13	-0.287	1	0.014	Oocyte Enriched	0.0272522	0.055
scpl-1	MSTRG.2043	NA	chrI:10088387-10088504	A3SS	soma	0.00898709	-0.037	1	0.01	not sig	0.051939	0.018
obr-1	MSTRG.8990	NA	chrIII:11265433-11265562	A3SS	soma	4.13693e-05	-0.088	1	-0.005	not sig	0.0569064	0.025
F44B9.5	MSTRG.8226	NA	chrIII:8015373-8015651	A3SS	soma	0.0391892	-0.018	1	-0.004	not sig	0.0677462	0.014
ttr-45	MSTRG.13695	NA	chrIV:13255144-13255538	A3SS	soma	0.00166473	-0.015	1	0.002	not sig	0.0901324	-0.042
clp-4	MSTRG.6953	NA	chrIII:1812754-1813111	A3SS	soma	0.0442635	-0.079	1	0.004	not sig	0.1266	0.014
mask-1	MSTRG.12927	NA	chrIV:10378656-10378799	A3SS	soma	0.0022562	-0.379	1	0.005	not sig	0.141075	0.077
F45F2.10	MSTRG.18936	NA	chrV:8518120-8518372	A3SS	soma	0.00226823	-0.667	1	-0.027	not sig	0.23293	0.089
K10C3.4	MSTRG.1989	K10C3.4	chrI:9860496-9860616	A3SS	soma	0.00183744	-0.038	1	0.005	not sig	0.236532	0.035
pnk-1	MSTRG.1137	NA	chrI:6297142-6297272	A3SS	soma	3.4984e-10	-0.028	1	0	not sig	0.25517	0.003
D2030.7	MSTRG.1443	NA	chrI:7589508-7589818	A3SS	soma	0.0317374	-0.035	1	0.003	not sig	0.282547	-0.007
uso-1	MSTRG.13729	NA	chrIV:13453343-13453507	A3SS	soma	0.00886565	-0.325	1	0.046	not sig	0.34869	0.105
C27A7.5	MSTRG.20062	C27A7.5	chrV:12160297-12160443	A3SS	soma	0.0046931	-0.198	1	0.043	not sig	0.376297	-0.066
wdr-20	MSTRG.19369	NA	chrV:10130877-10130894	A3SS	soma	0.0186168	-0.046	1	0.003	not sig	0.445793	-0.001
nhr-69	MSTRG.1996	NA	chrI:9880026-9880215	A3SS	soma	0.00924004	-0.09	1	-0.002	not sig	0.587773	-0.024
rbm-5	MSTRG.1117	NA	chrI:6217016-6217254	A3SS	soma	0.0120669	-0.089	1	0.011	not sig	0.655631	0.001
F07H5.3	MSTRG.5226	NA	chrII:8785137-8785316	A3SS	soma	7.38438e-10	-0.153	1	0.008	not sig	0.90791	0.018
F59A6.12	MSTRG.4157	NA	chrII:5011515-5011731	A3SS	soma	0	-0.048	1	0.001	not sig	1	0.5
T28B4.1	MSTRG.23707	T28B4.1	chrX:6595794-6596135	A3SS	soma	0	-0.278	1	-0.008	not sig	1	0.058
ZC376.2	MSTRG.20661	ZC376.2	chrV:14174718-14174922	A3SS	soma	0	-0.429	1	0.003	not sig	1	-0.239
itr-1	MSTRG.12202	NA	chrIV:7692288-7692473	A3SS	soma	0	-0.547	1	-0.001	not sig	1	-0.076
F46H5.7	MSTRG.23893	F46H5.7	chrX:7239294-7239463	A3SS	soma	0	-0.131	1	-0.001	not sig	1	-0.006
endu-1	MSTRG.1966	NA	chrI:9746443-9746511	A3SS	soma	0	-0.162	1	-0.002	not sig	1	0.008
igeg-1	MSTRG.10211	NA	chrIV:4564527-4564710	A3SS	soma	0	-0.353	1	0.006	not sig	1	-0.122
npa-1	MSTRG.18590	NA	chrV:7076488-7077188	A3SS	soma	0	-0.183	1	0.001	not sig	1	-0.024
lec-9	MSTRG.26253	NA	chrX:17600595-17600687	A3SS	soma	0	-0.288	1	0.005	not sig	1	0.005
nlp-56	MSTRG.15224	NA	chrIV:14783947-14784037	A3SS	soma	0	-0.411	1	0.002	not sig	1	0
cbp-3	MSTRG.8729	NA	chrIII:9914769-9914905	A3SS	soma	0	-0.398	1	0	not sig	1	0.092
F37H8.5	MSTRG.5817	NA	chrII:11188507-11188894	A3SS	soma	0	-0.274	1	0.003	not sig	1	-0.003
C34D10.2	MSTRG.24124	NA	chrX:8022767-8022909	A3SS	soma	0	-0.337	1	0.114	not sig	1	0.042
F19G12.9	MSTRG.22450	NA	chrX:1419977-1420147	A3SS	soma	0	-0.081	1	0.001	not sig	1	0.039
kin-1	MSTRG.2940	kin-1	chrI:14949163-14949278	A3SS	soma	3.39425e-15	-0.12	1	-0.003	not sig	1	-0.007
Y110A7A.21	MSTRG.850	NA	chrI:5110540-5110655	A3SS	soma	1.62201e-13	-0.13	1	-0.01	not sig	1	0.143
C07E3.9	MSTRG.5608	NA	chrII:10351332-10352082	A3SS	soma	3.49662e-13	-0.071	1	-0.001	not sig	1	0.01
C17H12.8	MSTRG.11930	NA	chrIV:6820349-6820643	A3SS	soma	1.82048e-11	-0.042	1	0.005	not sig	1	-0.001
nhr-27;alh-13	MSTRG.25241	NA	chrX:12783391-12783548	A3SS	soma	2.01021e-11	-0.558	1	0.006	not sig	1	0.194
oac-20	MSTRG.21094	NA	chrV:15981356-15981450	A3SS	soma	6.90426e-11	-0.504	1	-0.019	not sig	1	-0.038
K05B2.2	MSTRG.23264	NA	chrX:4911336-4911576	A3SS	soma	7.82658e-11	-0.38	1	-0.002	not sig	1	0.13
Y45G5AM.9;nhr-114	MSTRG.17925	NA	chrV:4187601-4187809	A3SS	soma	1.91615e-10	-0.074	1	0	not sig	1	0.009
T16G12.9	MSTRG.8778	T16G12.9	chrIII:10077479-10077652	A3SS	soma	2.27721e-10	-1	1	0.167	not sig	1	0.334
F38E9.1	MSTRG.26057	NA	chrX:16472330-16472429	A3SS	soma	4.95863e-10	-0.327	1	0.003	not sig	1	-0.013
C10A4.13	MSTRG.23936	NA	chrX:7397638-7397749	A3SS	soma	7.10239e-10	-0.319	1	0.007	not sig	1	-0.106
vha-15	MSTRG.22634	NA	chrX:2238698-2239199	A3SS	soma	2.48755e-09	-0.048	1	-0.003	not sig	1	0.137
lact-5	MSTRG.4091	NA	chrII:4819947-4820110	A3SS	soma	1.61398e-08	-0.217	1	0.003	not sig	1	-0.25
Y69H2.3	MSTRG.21736	NA	chrV:18660842-18660980	A3SS	soma	2.08753e-08	-0.176	1	0.005	not sig	1	-0.002
C53D5.5	MSTRG.46	NA	chrI:309204-309442	A3SS	soma	4.88772e-08	-0.257	1	-0.006	not sig	1	-0.051
chd-7	MSTRG.759	NA	chrI:4696676-4697198	A3SS	soma	5.89705e-08	-0.587	1	0.013	not sig	1	0.726
maa-1	MSTRG.9099	maa-1	chrIII:11820684-11820873	A3SS	soma	6.3008e-08	-0.077	1	-0.006	not sig	1	0.026
W02B3.4	MSTRG.6716	NA	chrIII:682141-682281	A3SS	soma	8.07003e-08	-0.418	1	-0.005	not sig	1	-0.121
K02C4.5	MSTRG.5036	NA	chrII:8079089-8079562	A3SS	soma	8.70234e-08	-0.109	1	-0.001	not sig	1	-0.016
pnk-4	MSTRG.23296	NA	chrX:5089762-5089925	A3SS	soma	2.79189e-07	-0.323	1	0.011	not sig	1	0.53
kgb-1	MSTRG.9456	NA	chrIV:406732-406910	A3SS	soma	3.27554e-07	-0.044	1	-0.005	not sig	1	0.072
skpo-3	MSTRG.4828	NA	chrII:7247334-7247649	A3SS	soma	3.95398e-07	-0.149	1	0.005	not sig	1	0.198
metr-1	MSTRG.5741	NA	chrII:10927128-10927217	A3SS	soma	4.64837e-07	-0.041	1	0.004	not sig	1	0.005
trhr-1	MSTRG.1312	NA	chrI:6990786-6990911	A3SS	soma	8.90285e-07	-0.277	1	-0.034	not sig	1	-0.17
C05D10.4	MSTRG.7792	NA	chrIII:6089202-6089330	A3SS	soma	9.27484e-07	-0.093	1	-0.01	not sig	1	0.021
B0361.3	MSTRG.8069	B0361.3	chrIII:7282595-7282782	A3SS	soma	1.55783e-06	-0.049	1	0.004	not sig	1	0.006
lim-9	MSTRG.1791	NA	chrI:9205586-9205738	A3SS	soma	1.8196e-06	-0.069	1	-0.001	not sig	1	0.097
kmo-1	MSTRG.20037	NA	chrV:12069173-12069236	A3SS	soma	4.26987e-06	-0.063	1	0.007	not sig	1	0.098
apl-1	MSTRG.23302	NA	chrX:5113468-5113606	A3SS	soma	8.59385e-06	-0.038	1	0.083	not sig	1	0.143
vps-41	MSTRG.23338	NA	chrX:5286992-5287191	A3SS	soma	9.1612e-06	-0.409	1	-0.006	not sig	1	0.23
linc-116	MSTRG.8133	NA	chrIII:7612973-7613431	A3SS	soma	9.32561e-06	-0.564	1	0.045	not sig	1	0.059
let-413	MSTRG.18808	NA	chrV:7976389-7976626	A3SS	soma	1.68665e-05	-0.13	1	0.01	not sig	1	0.215
F45D3.4	MSTRG.20223	F45D3.4	chrV:12552210-12553023	A3SS	soma	1.69802e-05	-0.06	1	0.001	not sig	1	0.004
rgs-7	MSTRG.22923	NA	chrX:3546490-3546616	A3SS	soma	2.72467e-05	-0.516	1	-0.056	not sig	1	0.748
let-19	MSTRG.5224	NA	chrII:8777466-8777736	A3SS	soma	3.2234e-05	-0.366	1	-0.004	not sig	1	0.625
ncx-1	MSTRG.22046	ncx-1	chrV:20119653-20119818	A3SS	soma	5.38873e-05	-0.118	1	-0.002	not sig	1	0.053
R10E8.7	MSTRG.21411	NA	chrV:18233019-18233159	A3SS	soma	5.47033e-05	-0.247	1	0.001	not sig	1	0.75
C41A3.2	MSTRG.23363	NA	chrX:5409916-5410016	A3SS	soma	6.21444e-05	-0.11	1	-0.018	not sig	1	0.096
cgef-1;C14A11.11	MSTRG.22752	cgef-1	chrX:2796595-2796709	A3SS	soma	9.16757e-05	-0.371	1	-0.023	not sig	1	0.284
far-1	MSTRG.8508	NA	chrIII:9080568-9080667	A3SS	soma	0.000119735	-0.009	1	-0.002	not sig	1	-0.001
T23F4.2	MSTRG.3247	T23F4.2	chrII:1164431-1164552	A3SS	soma	0.000127745	-0.158	1	0.003	not sig	1	0.077
T26C11.4	MSTRG.22555	T26C11.4	chrX:1843353-1843473	A3SS	soma	0.000156402	-0.212	1	-0.044	not sig	1	-0.207
ptb-1	MSTRG.5685	NA	chrII:10678983-10679064	A3SS	soma	0.000176015	-0.237	1	0.023	not sig	1	0.133
aat-4;21ur-13649;21ur-15643;21ur-11650	MSTRG.11649	aat-4	chrIV:6273097-6273203	A3SS	soma	0.000193348	-0.224	1	0.009	not sig	1	0.046
pals-19	MSTRG.6877	NA	chrIII:1402271-1402473	A3SS	soma	0.000211027	-0.407	1	-0.146	not sig	1	-0.4
C23H5.8	MSTRG.9725	C23H5.8	chrIV:2111893-2112494	A3SS	soma	0.000219706	0.033	1	0.001	not sig	1	0.014
ugt-47	MSTRG.19360	ugt-47	chrV:10097068-10097474	A3SS	soma	0.000274596	-0.052	1	0.003	not sig	1	0.25
F15B9.6	MSTRG.20361	NA	chrV:13014579-13014752	A3SS	soma	0.000323783	-0.096	1	-0.003	not sig	1	1
F26F12.3	MSTRG.18269	NA	chrV:5840646-5843654	A3SS	soma	0.000392732	-0.017	1	0.003	not sig	1	-0.004
C27A7.1	MSTRG.20056	NA	chrV:12136064-12136138	A3SS	soma	0.000507255	-0.088	1	-0.029	not sig	1	-0.032
klo-2	MSTRG.7057	NA	chrIII:2448036-2448248	A3SS	soma	0.000654651	-0.218	1	-0.003	not sig	1	0.493
pho-14	MSTRG.3238	NA	chrII:1098584-1098685	A3SS	soma	0.000675605	-0.053	1	0.003	not sig	1	-0.008
ncs-4	MSTRG.24668	NA	chrX:10179785-10179943	A3SS	soma	0.000715004	-0.125	1	-0.021	not sig	1	-0.058
H06I04.6	MSTRG.7145	NA	chrIII:3061191-3061316	A3SS	soma	0.000756554	-0.061	1	-0.009	not sig	1	0.012
R07H5.9	MSTRG.13147	NA	chrIV:11208592-11208779	A3SS	soma	0.00100528	-0.129	1	0.017	not sig	1	-0.016
nhr-179	MSTRG.17449	NA	chrV:1616394-1616822	A3SS	soma	0.00106593	-0.24	1	-0.021	not sig	1	0.167
atl-1	MSTRG.19240	NA	chrV:9645380-9645472	A3SS	soma	0.00113078	-0.246	1	-0.032	not sig	1	0.148
pals-19	MSTRG.6877	NA	chrIII:1402297-1402473	A3SS	soma	0.00116226	-0.327	1	-0.071	not sig	1	-0.408
rbc-1	MSTRG.25647	NA	chrX:14614486-14614810	A3SS	soma	0.00127179	-0.361	1	0.017	not sig	1	0.354
W03D2.6	MSTRG.10088	NA	chrIV:4057244-4057422	A3SS	soma	0.00140486	-0.038	1	0	not sig	1	0.333
sdc-1	MSTRG.26026	NA	chrX:16278623-16279019	A3SS	soma	0.0014234	-0.176	1	-0.057	not sig	1	0.025
pqn-15	MSTRG.23104	NA	chrX:4303288-4304635	A3SS	soma	0.00159067	-0.486	1	0.018	not sig	1	0.522
nhr-179	MSTRG.17449	NA	chrV:1616394-1616773	A3SS	soma	0.00160289	-0.223	1	-0.027	not sig	1	0.2
C29G2.6	MSTRG.17663	C29G2.6	chrV:2584179-2584306	A3SS	soma	0.00172773	-0.033	1	0.006	not sig	1	-0.03
sptl-1;tre-5	MSTRG.2988	NA	chrII:54755-55106	A3SS	soma	0.00179471	-0.057	1	0.006	not sig	1	0.962
nhr-179	MSTRG.17449	NA	chrV:1616394-1616850	A3SS	soma	0.00184451	-0.247	1	-0.026	not sig	1	0.143
nhr-179	MSTRG.17449	NA	chrV:1616394-1616753	A3SS	soma	0.00189931	-0.234	1	-0.025	not sig	1	0.25
F28H6.6	MSTRG.25545	NA	chrX:14122887-14122983	A3SS	soma	0.00197262	-0.275	1	-0.121	not sig	1	0.123
Y105E8A.28	MSTRG.2878	NA	chrI:14497644-14498052	A3SS	soma	0.00222729	-0.404	1	-0.072	not sig	1	0.207
ptc-3	MSTRG.3674	ptc-3	chrII:2848168-2848309	A3SS	soma	0.00233317	-0.286	1	0.012	not sig	1	-0.029
Y39H10B.2	MSTRG.17828	NA	chrV:3670336-3670840	A3SS	soma	0.00244125	-0.026	1	0.002	not sig	1	-0.018
aakg-5	MSTRG.5518	NA	chrII:9974616-9974711	A3SS	soma	0.0024662	0.067	1	-0.002	not sig	1	-0.01
nhr-179	MSTRG.17449	NA	chrV:1616394-1616829	A3SS	soma	0.00249086	-0.22	1	-0.012	not sig	1	0.167
acs-21	MSTRG.17726	NA	chrV:3089584-3089738	A3SS	soma	0.00309466	-0.115	1	0.028	not sig	1	0.043
pcca-1;dhs-29	MSTRG.24031	NA	chrX:7662405-7662579	A3SS	soma	0.00333636	-0.202	1	-0.008	not sig	1	-0.2
gck-4	MSTRG.25438	NA	chrX:13681398-13681551	A3SS	soma	0.00452903	-0.29	1	-0.023	not sig	1	0.716
K12H6.12	MSTRG.3660	NA	chrII:2810230-2810668	A3SS	soma	0.00483922	-0.119	1	-0.001	not sig	1	-0.035
C14A11.9	MSTRG.22763	NA	chrX:2808362-2808450	A3SS	soma	0.00517098	-0.054	1	-0.021	not sig	1	0.002
C41D11.3	MSTRG.711	C41D11.3	chrI:4443543-4444017	A3SS	soma	0.00571825	-0.078	1	-0.013	not sig	1	0.003
F57C12.2	MSTRG.22308	NA	chrX:549864-550065	A3SS	soma	0.00594233	0.098	1	-0.008	not sig	1	-0.111
cgef-1	MSTRG.22752	cgef-1	chrX:2798695-2799247	A3SS	soma	0.00682721	-0.208	1	-0.026	not sig	1	0.333
nep-11	MSTRG.3809	NA	chrII:3424412-3424760	A3SS	soma	0.00745903	-0.326	1	0.016	not sig	1	0.281
W05H9.1	MSTRG.23632	W05H9.1	chrX:6273206-6273391	A3SS	soma	0.00855047	-0.029	1	0.001	not sig	1	0.008
ZC404.1	MSTRG.18523	NA	chrV:6794983-6795771	A3SS	soma	0.00867762	-0.084	1	-0.009	not sig	1	1
W03D2.6	MSTRG.10088	NA	chrIV:4057467-4057913	A3SS	soma	0.00920418	0.022	1	-0.002	not sig	1	-0.035
C44H9.5	MSTRG.20300	NA	chrV:12847197-12847502	A3SS	soma	0.0104076	-0.149	1	0.025	not sig	1	0.61
Y55F3AM.21	MSTRG.9565	NA	chrIV:1050375-1050546	A3SS	soma	0.0106393	-0.309	1	0.023	not sig	1	0.118
F32D8.11	MSTRG.19628	NA	chrV:10888171-10888410	A3SS	soma	0.0111706	-0.028	1	-0.003	not sig	1	0.173
herc-1	MSTRG.170	NA	chrI:1245222-1245392	A3SS	soma	0.012242	-0.05	1	-0.03	not sig	1	0.008
pcca-1;stn-2	MSTRG.24036	NA	chrX:7677027-7677192	A3SS	soma	0.013541	0.077	1	0.005	not sig	1	-0.1
C35B1.2	MSTRG.10095	NA	chrIV:4100934-4101425	A3SS	soma	0.0156735	-0.056	1	-0.008	not sig	1	0.026
attf-5	MSTRG.22357	NA	chrX:792086-792250	A3SS	soma	0.0158346	0.212	1	0.081	not sig	1	-0.041
Y37A1A.4	MSTRG.14153	NA	chrIV:13956284-13956396	A3SS	soma	0.016124	-0.159	1	-0.006	not sig	1	0.427
Y71H2AM.3	MSTRG.7106	NA	chrIII:2806905-2807292	A3SS	soma	0.0171469	-0.092	1	0.008	not sig	1	0.005
crm-1	MSTRG.19432	NA	chrV:10322856-10322990	A3SS	soma	0.0196728	-0.028	1	0.002	not sig	1	-0.118
ccr-4;ZC518.8	MSTRG.13477	ZC518.8	chrIV:12361763-12361847	A3SS	soma	0.0217592	-0.08	1	-0.013	not sig	1	0.25
F47B7.2;marg-1	MSTRG.22970	NA	chrX:3776914-3778148	A3SS	soma	0.0220854	-0.193	1	0.008	not sig	1	-0.086
anp-1	MSTRG.20303	anp-1	chrV:12861580-12862057	A3SS	soma	0.0223678	-0.023	1	-0.005	not sig	1	-0.026
ptr-12	MSTRG.356	NA	chrI:2591000-2591749	A3SS	soma	0.0261469	-0.136	1	-0.01	not sig	1	0.5
nhr-121	MSTRG.7058	nhr-121	chrIII:2449701-2449865	A3SS	soma	0.0290478	-0.137	1	0.023	not sig	1	0.019
scpl-4	MSTRG.19516	NA	chrV:10599358-10599470	A3SS	soma	0.0312725	-0.023	1	0.006	not sig	1	0.002
F32D8.7	MSTRG.19633	F32D8.7	chrV:10899627-10899731	A3SS	soma	0.0327789	-0.256	1	0.052	not sig	1	0.131
clec-83	MSTRG.9858	NA	chrIV:2840590-2841080	A3SS	soma	0.0385114	-0.181	1	-0.005	not sig	1	0.065
ent-7	MSTRG.12816	NA	chrIV:10019252-10019580	A3SS	soma	0.0388246	-0.062	1	0.001	not sig	1	0.204
set-16	MSTRG.9365	NA	chrIII:13651299-13653147	A3SS	soma	0.0392778	-0.115	1	-0.023	not sig	1	0.128
ZK809.9	MSTRG.13270	NA	chrIV:11666275-11666704	A3SS	soma	0.0483259	-0.314	1	0.243	not sig	1	1
F44E7.5	MSTRG.18250	F44E7.5	chrV:5779576-5779730	A3SS	soma	0.049238	0.066	1	-0.023	not sig	1	-0.002
srp-1	MSTRG.17325	NA	chrV:754242-754415	A3SS	soma	0	-0.438	1	-0.006	not sig	NA	NA
F59A6.12	MSTRG.4157	NA	chrII:5011773-5011955	A3SS	soma	0	-0.581	1	0	not sig	NA	NA
T02C5.1;igcm-3	MSTRG.22737	NA	chrX:2697984-2698273	A3SS	soma	0	-0.15	1	-0.004	not sig	NA	NA
F37C12.1;F37C12.10	MSTRG.8046	NA	chrIII:7187840-7188157	A3SS	soma	0	-0.511	1	-0.001	not sig	NA	NA
D1005.4	MSTRG.22467	NA	chrX:1484852-1485055	A3SS	soma	0	-0.27	1	-0.004	not sig	NA	NA
R10E9.3	MSTRG.7301	NA	chrIII:3960775-3960943	A3SS	soma	0	-0.481	1	0.024	not sig	NA	NA
F11F1.1	MSTRG.9317	NA	chrIII:13399258-13399366	A3SS	soma	0	-0.849	1	-0.002	not sig	NA	NA
F49C12.6;F49C12.7	MSTRG.12585	NA	chrIV:9308842-9309418	A3SS	soma	0	-0.26	1	0.002	not sig	NA	NA
lipl-3	MSTRG.17293	NA	chrV:523969-524081	A3SS	soma	0	-0.111	1	0.005	not sig	NA	NA
F09C8.1	MSTRG.26003	NA	chrX:16161039-16161203	A3SS	soma	0	-0.119	1	0.003	not sig	NA	NA
zmp-4	MSTRG.20866	NA	chrV:14918213-14918319	A3SS	soma	0	-0.315	1	-0.001	not sig	NA	NA
Y105C5A.8;21ur-10302	MSTRG.15998	NA	chrIV:15614951-15615096	A3SS	soma	0	-0.114	1	0.002	not sig	NA	NA
math-22	MSTRG.3459	NA	chrII:1907382-1907888	A3SS	soma	0	-0.319	1	-0.002	not sig	NA	NA
clec-57	MSTRG.20745	clec-57	chrV:14470501-14470626	A3SS	soma	1.98248e-14	-0.139	1	0.006	not sig	NA	NA
W03G11.2	MSTRG.25125	NA	chrX:12108290-12108431	A3SS	soma	5.74412e-14	-0.468	1	0.013	not sig	NA	NA
sgk-1	MSTRG.26016	NA	chrX:16258912-16259005	A3SS	soma	8.78513e-14	-0.18	1	-0.017	not sig	NA	NA
pho-7	MSTRG.24836	pho-7	chrX:10941040-10941139	A3SS	soma	1.02676e-13	-0.274	1	-0.007	not sig	NA	NA
T28H10.2	MSTRG.20207	NA	chrV:12511411-12511727	A3SS	soma	6.2228e-13	-0.205	1	0.018	not sig	NA	NA
F38E11.6	MSTRG.12633	F38E11.6	chrIV:9464922-9465023	A3SS	soma	2.37003e-11	-0.576	1	-0.025	not sig	NA	NA
C40H1.7	MSTRG.8570	NA	chrIII:9325696-9325770	A3SS	soma	8.91507e-11	-0.08	1	-0.011	not sig	NA	NA
Y4C6B.4	MSTRG.10669	NA	chrIV:5327789-5328112	A3SS	soma	1.04966e-10	-0.105	1	0.009	not sig	NA	NA
C25E10.12	MSTRG.19081	C25E10.12	chrV:9062053-9062161	A3SS	soma	1.17342e-10	-0.068	1	0.006	not sig	NA	NA
sma-4	MSTRG.7733	NA	chrIII:5819381-5819493	A3SS	soma	3.26095e-10	-0.076	1	-0.001	not sig	NA	NA
ggr-3	MSTRG.4191	NA	chrII:5132317-5132428	A3SS	soma	2.3108e-09	-0.211	1	0.017	not sig	NA	NA
F44A2.3	MSTRG.19149	F44A2.3	chrV:9309446-9309559	A3SS	soma	2.72843e-09	-0.082	1	-0.002	not sig	NA	NA
F43C11.7	MSTRG.3565	NA	chrII:2336522-2336692	A3SS	soma	4.89419e-09	0.032	1	0	not sig	NA	NA
Y17D7B.7	MSTRG.21762	NA	chrV:18780576-18780632	A3SS	soma	5.22417e-09	-0.07	1	0.002	not sig	NA	NA
T28H10.3	MSTRG.20208	NA	chrV:12514199-12514417	A3SS	soma	6.29111e-09	-0.021	1	-0.002	not sig	NA	NA
W03D2.6	MSTRG.10088	NA	chrIV:4056836-4057428	A3SS	soma	7.86758e-09	-0.066	1	0.006	not sig	NA	NA
C13C4.6	MSTRG.20053	NA	chrV:12122971-12123089	A3SS	soma	1.52881e-08	-0.852	1	-0.036	not sig	NA	NA
C34F6.11	MSTRG.24907	NA	chrX:11203038-11203149	A3SS	soma	1.65896e-08	-0.119	1	-0.001	not sig	NA	NA
gst-13	MSTRG.5334	NA	chrII:9232188-9232369	A3SS	soma	1.66371e-08	-0.032	1	0.001	not sig	NA	NA
slc-36.3	MSTRG.22141	NA	chrV:20542223-20542320	A3SS	soma	2.18479e-08	-0.366	1	-0.005	not sig	NA	NA
twk-25	MSTRG.13232	twk-25	chrIV:11505522-11505604	A3SS	soma	2.79133e-08	-0.559	1	-0.013	not sig	NA	NA
F09B12.7	MSTRG.25768	F09B12.7	chrX:15093789-15093872	A3SS	soma	1.63145e-07	-0.331	1	0.017	not sig	NA	NA
nhr-152	MSTRG.18727	nhr-152	chrV:7687299-7687403	A3SS	soma	2.99475e-07	-0.266	1	0.008	not sig	NA	NA
nas-31	MSTRG.19640	NA	chrV:10921252-10921380	A3SS	soma	8.27728e-07	-0.165	1	0.009	not sig	NA	NA
ZK1240.3	MSTRG.3559	ZK1240.3	chrII:2321165-2321217	A3SS	soma	1.18949e-06	-0.062	1	0.003	not sig	NA	NA
asp-8	MSTRG.17718	NA	chrV:3027514-3027931	A3SS	soma	1.39318e-06	-0.132	1	-0.005	not sig	NA	NA
scpl-3	MSTRG.680	NA	chrI:4298356-4298726	A3SS	soma	2.94917e-06	-0.386	1	-0.003	not sig	NA	NA
ZK418.6	MSTRG.8012	NA	chrIII:7077622-7077761	A3SS	soma	3.88074e-06	-0.17	1	-0.003	not sig	NA	NA
acs-12	MSTRG.22218	NA	chrV:20904979-20905158	A3SS	soma	5.00822e-06	-0.102	1	0.003	not sig	NA	NA
pgp-11	MSTRG.5017	NA	chrII:7997790-7998295	A3SS	soma	5.6711e-06	-0.165	1	-0.014	not sig	NA	NA
cld-9	MSTRG.20546	NA	chrV:13749180-13749617	A3SS	soma	8.67935e-06	-0.135	1	-0.011	not sig	NA	NA
ppm-1.H	MSTRG.13455	NA	chrIV:12266473-12266685	A3SS	soma	1.58906e-05	-0.354	1	-0.024	not sig	NA	NA
hizr-1	MSTRG.24935	NA	chrX:11320166-11320282	A3SS	soma	1.58906e-05	-0.103	1	-0.004	not sig	NA	NA
F44A2.3	MSTRG.19149	F44A2.3	chrV:9309341-9309404	A3SS	soma	1.80102e-05	-0.068	1	-0.005	not sig	NA	NA
F58E2.3	MSTRG.9973	NA	chrIV:3468525-3468637	A3SS	soma	2.29246e-05	-0.614	1	-0.053	not sig	NA	NA
egas-4	MSTRG.12152	NA	chrIV:7495598-7495668	A3SS	soma	2.94353e-05	-0.376	1	-0.07	not sig	NA	NA
T19D2.3	MSTRG.23014	adt-3	chrX:3939740-3939902	A3SS	soma	3.93368e-05	-0.05	1	0	not sig	NA	NA
ech-8	MSTRG.12896	NA	chrIV:10237081-10237216	A3SS	soma	3.98384e-05	-0.031	1	-0.002	not sig	NA	NA
C33C12.4	MSTRG.3524	NA	chrII:2164805-2165525	A3SS	soma	4.39811e-05	-0.134	1	-0.045	not sig	NA	NA
	MSTRG.23111	NA	chrX:4327526-4327693	A3SS	soma	4.45448e-05	-0.228	1	-0.023	not sig	NA	NA
ceh-22	MSTRG.19541	ceh-22	chrV:10674344-10674440	A3SS	soma	4.71656e-05	-0.259	1	0.026	not sig	NA	NA
F47B8.8	MSTRG.20711	NA	chrV:14332078-14332386	A3SS	soma	5.04027e-05	-0.039	1	-0.001	not sig	NA	NA
K05F1.10	MSTRG.4416	NA	chrII:5804485-5804919	A3SS	soma	7.67364e-05	-0.027	1	0.001	not sig	NA	NA
T21C9.6	MSTRG.19509	NA	chrV:10583907-10584055	A3SS	soma	8.77799e-05	-0.092	1	0	not sig	NA	NA
eol-1	MSTRG.20612	NA	chrV:13979845-13980006	A3SS	soma	8.78297e-05	-0.09	1	-0.004	not sig	NA	NA
pcca-1;dhs-29	MSTRG.24031	NA	chrX:7663281-7663378	A3SS	soma	0.000103178	-0.102	1	-0.002	not sig	NA	NA
F58F9.3	MSTRG.11615	NA	chrIV:6235077-6235158	A3SS	soma	0.000112417	-0.038	1	0.004	not sig	NA	NA
ceh-1	MSTRG.23207	NA	chrX:4653661-4653816	A3SS	soma	0.000122901	-0.264	1	-0.061	not sig	NA	NA
dgk-3	MSTRG.8537	dgk-3	chrIII:9167959-9168027	A3SS	soma	0.000126044	-0.669	1	0.14	not sig	NA	NA
F22G12.8	MSTRG.2641	NA	chrI:13146003-13146659	A3SS	soma	0.000136321	-0.342	1	0.002	not sig	NA	NA
mpz-1	MSTRG.5704	NA	chrII:10763264-10763365	A3SS	soma	0.000156757	-0.283	1	-0.096	not sig	NA	NA
C05E4.12	MSTRG.17327	NA	chrV:761623-761724	A3SS	soma	0.000186429	-0.418	1	-0.037	not sig	NA	NA
unc-30	MSTRG.13663	unc-30	chrIV:13122302-13122391	A3SS	soma	0.000202758	-0.297	1	0.01	not sig	NA	NA
ZC21.6;ZC21.17	MSTRG.8375	NA	chrIII:8544587-8544758	A3SS	soma	0.000219706	-0.384	1	-0.052	not sig	NA	NA
dmsr-16;T27B2.2	MSTRG.18525	NA	chrV:6808674-6808771	A3SS	soma	0.000246839	-0.462	1	0.114	not sig	NA	NA
pat-9	MSTRG.26070	NA	chrX:16537995-16538124	A3SS	soma	0.000276217	-0.469	1	0.007	not sig	NA	NA
mtd-1	MSTRG.2950	NA	chrI:15003599-15003863	A3SS	soma	0.000462249	-0.091	1	0.003	not sig	NA	NA
D2085.7	MSTRG.5194	NA	chrII:8644284-8644766	A3SS	soma	0.000478002	-0.399	1	-0.136	not sig	NA	NA
fbxa-37	MSTRG.6844	NA	chrIII:1286841-1287119	A3SS	soma	0.000638218	0.278	1	0.084	not sig	NA	NA
dhp-1	MSTRG.1370	NA	chrI:7242184-7242374	A3SS	soma	0.000827773	-0.038	1	0.002	not sig	NA	NA
snb-2	MSTRG.20144	NA	chrV:12344599-12344750	A3SS	soma	0.00127204	-0.261	1	-0.066	not sig	NA	NA
K10G6.4	MSTRG.3924	NA	chrII:3974572-3974714	A3SS	soma	0.00153047	-0.514	1	0.027	not sig	NA	NA
C06E4.8	MSTRG.12085	NA	chrIV:7284698-7284884	A3SS	soma	0.00158266	-0.034	1	-0.004	not sig	NA	NA
C08G5.7	MSTRG.3133	snt-6	chrII:756792-756924	A3SS	soma	0.00306269	-0.129	1	-0.002	not sig	NA	NA
Y46C8AM.1	MSTRG.10071	NA	chrIV:3963572-3963832	A3SS	soma	0.0038267	0.13	1	-0.01	not sig	NA	NA
Y37H2A.13;Y37H2A.14	MSTRG.21383	NA	chrV:18143394-18143812	A3SS	soma	0.00449812	0.324	1	-0.002	not sig	NA	NA
C15H9.4;C15H9.11	MSTRG.23581	C15H9.11	chrX:6103133-6103210	A3SS	soma	0.00501468	-0.022	1	0	not sig	NA	NA
dmsr-1	MSTRG.19830	NA	chrV:11440090-11440558	A3SS	soma	0.00581473	-0.081	1	0.008	not sig	NA	NA
ham-2	MSTRG.23185	ham-2	chrX:4557333-4557605	A3SS	soma	0.00692021	-0.206	1	-0.019	not sig	NA	NA
dop-1	MSTRG.23138	NA	chrX:4411288-4411738	A3SS	soma	0.00742212	-0.207	1	-0.037	not sig	NA	NA
C50F4.9	MSTRG.19212	NA	chrV:9523166-9523468	A3SS	soma	0.00818743	-0.018	1	0.003	not sig	NA	NA
lron-8	MSTRG.996	lron-8	chrI:5771311-5771599	A3SS	soma	0.00869757	-0.062	1	-0.004	not sig	NA	NA
T08B6.2	MSTRG.10352	NA	chrIV:4896458-4896658	A3SS	soma	0.00905621	-0.174	1	0.028	not sig	NA	NA
acr-8	MSTRG.24720	NA	chrX:10412922-10413083	A3SS	soma	0.0100859	-0.101	1	0.011	not sig	NA	NA
K07C10.3	MSTRG.5809	NA	chrII:11167537-11167704	A3SS	soma	0.0121856	-0.073	1	-0.002	not sig	NA	NA
M153.1	MSTRG.25134	NA	chrX:12148608-12148913	A3SS	soma	0.0130649	-0.19	1	-0.026	not sig	NA	NA
B0281.4	MSTRG.3550	NA	chrII:2297846-2298089	A3SS	soma	0.017293	-0.138	1	0.019	not sig	NA	NA
grsp-2	MSTRG.12474	NA	chrIV:8818117-8818554	A3SS	soma	0.0192124	-0.432	1	-0.003	not sig	NA	NA
F47B8.5	MSTRG.20708	F47B8.18	chrV:14326480-14326558	A3SS	soma	0.0198703	-0.151	1	-0.018	not sig	NA	NA
B0034.5	MSTRG.4458	NA	chrII:5973249-5973382	A3SS	soma	0.0218326	-0.186	1	0.042	not sig	NA	NA
mltn-1;F32A11.9	MSTRG.6259	NA	chrII:13144915-13145384	A3SS	soma	0.0270516	-0.122	1	0.03	not sig	NA	NA
Y20C6A.1	MSTRG.21529	NA	chrV:17373840-17374570	A3SS	soma	0.0298104	0.143	1	0.009	not sig	NA	NA
srx-125	MSTRG.20453	NA	chrV:13368988-13369063	A3SS	soma	0.0328816	-0.304	1	0.032	not sig	NA	NA
R04B3.2	MSTRG.22682	NA	chrX:2472083-2472183	A3SS	soma	0.0338814	-0.035	1	-0.011	not sig	NA	NA
chil-1;C08H9.9	MSTRG.5494	NA	chrII:9864324-9865661	A3SS	soma	0.0353337	-0.442	1	0.15	not sig	NA	NA
F44B9.9	MSTRG.8231	NA	chrIII:8030851-8031141	A3SS	soma	0.0356046	-0.5	1	-0.11	not sig	NA	NA
T11F8.2	MSTRG.10845	T11F8.2	chrIV:5478254-5478583	A3SS	soma	0.0398647	0.111	1	-0.031	not sig	NA	NA
dsh-1	MSTRG.4223	NA	chrII:5214931-5215044	A3SS	soma	0.0419431	0.106	1	-0.037	not sig	NA	NA
twk-18	MSTRG.24370	NA	chrX:8991269-8991972	A3SS	soma	0.045014	-0.027	1	0.002	not sig	NA	NA
mlt-11	MSTRG.22168	NA	chrV:20668172-20668710	A3SS	soma	0.0452732	0.193	1	0.023	not sig	NA	NA
abt-2	MSTRG.299	abt-2	chrI:2267328-2267441	A3SS	soma	9.03212e-05	-0.494	NA	NA	not sig	1	0.593
epg-7	MSTRG.23925	epg-7	chrX:7336718-7336838	A3SS	soma	0.00145043	-0.141	NA	NA	not sig	1	0.099
tig-2	MSTRG.18017	tig-2	chrV:4727873-4727960	A3SS	soma	0.00159417	-0.089	NA	NA	not sig	1	0.054
wdfy-3	MSTRG.13560	NA	chrIV:12661925-12662118	A3SS	soma	0.0108655	-0.222	NA	NA	not sig	1	0.342
pals-33	MSTRG.17829	NA	chrV:3675551-3675769	A3SS	soma	3.32321e-11	-0.23	NA	NA	not sig	NA	NA
linc-61	MSTRG.21113	linc-61	chrV:16043289-16043452	A3SS	soma	4.26191e-09	-0.188	NA	NA	not sig	NA	NA
ugt-60	MSTRG.8663	NA	chrIII:9678348-9678573	A3SS	soma	7.78348e-09	-0.156	NA	NA	not sig	NA	NA
T10H10.2	MSTRG.22644	NA	chrX:2296682-2296875	A3SS	soma	4.40456e-07	-0.101	NA	NA	not sig	NA	NA
C15B12.8	MSTRG.23687	NA	chrX:6475105-6475217	A3SS	soma	4.02849e-06	-0.168	NA	NA	not sig	NA	NA
T02B5.3	MSTRG.20657	NA	chrV:14160480-14160688	A3SS	soma	7.7349e-06	-0.146	NA	NA	not sig	NA	NA
tag-10	MSTRG.6322	NA	chrII:13636208-13636272	A3SS	soma	9.01763e-06	-0.103	NA	NA	not sig	NA	NA
T07D10.3	MSTRG.2552	NA	chrI:12627395-12627489	A3SS	soma	1.68665e-05	-0.189	NA	NA	not sig	NA	NA
ZK1055.6	MSTRG.18476	ZK1055.6	chrV:6600518-6601176	A3SS	soma	0.000138281	-0.064	NA	NA	not sig	NA	NA
C02F12.9	MSTRG.22956	C02F12.9	chrX:3700521-3700645	A3SS	soma	0.000177174	-0.659	NA	NA	not sig	NA	NA
nhr-76	MSTRG.9499	NA	chrIV:630687-630906	A3SS	soma	0.00106593	-0.174	NA	NA	not sig	NA	NA
gcy-33;21ur-14066	MSTRG.20018	gcy-33	chrV:11999071-11999531	A3SS	soma	0.00637143	-0.421	NA	NA	not sig	NA	NA
C06H5.6	MSTRG.21343	C06H5.6	chrV:17883581-17883752	A3SS	soma	0.00661179	-0.072	NA	NA	not sig	NA	NA
poml-3	MSTRG.646	NA	chrI:4145963-4146179	A3SS	soma	0.00682721	-0.021	NA	NA	not sig	NA	NA
irk-1	MSTRG.23759	NA	chrX:6767261-6767389	A3SS	soma	0.0136272	-0.553	NA	NA	not sig	NA	NA
T04F8.9	MSTRG.25015	NA	chrX:11676930-11677001	A3SS	soma	0.0156244	-0.452	NA	NA	not sig	NA	NA
F47G3.1	MSTRG.22661	NA	chrX:2389473-2389570	A3SS	soma	0.0256218	-0.256	NA	NA	not sig	NA	NA
srv-25	MSTRG.11679	NA	chrIV:6303342-6303742	A3SS	soma	0.0259331	-0.167	NA	NA	not sig	NA	NA
col-144	MSTRG.19111	NA	chrV:9159589-9159958	A3SS	soma	0.0299748	-0.178	NA	NA	not sig	NA	NA
T07D3.4;T07D3.5	MSTRG.3175	NA	chrII:885996-886280	A3SS	soma	0.0330952	-0.206	NA	NA	not sig	NA	NA
C50B8.4	MSTRG.20500	NA	chrV:13572036-13572656	A5SS	soma	0.0319191	0.345	0.0656509	0.119	not sig	1	-0.234
Y32B12C.5	MSTRG.21244	NA	chrV:16610217-16610416	A5SS	soma	0.00630802	0.165	0.0720138	-0.044	not sig	NA	NA
F35E12.9	MSTRG.20544	F35E12.9	chrV:13742665-13743123	A5SS	soma	0.0179024	-0.049	0.100687	-0.052	not sig	NA	NA
Y102A5C.5	MSTRG.21309	NA	chrV:16928935-16929016	A5SS	soma	0.0258693	0.449	0.107839	-0.166	not sig	1	0.004
T05H4.10;T05H4.11	MSTRG.18415	NA	chrV:6424033-6424894	A5SS	soma	0.00461611	-0.041	0.120622	-0.03	not sig	0.441578	0.011
C50F4.9	MSTRG.19212	NA	chrV:9523713-9524678	A5SS	soma	1.81509e-05	-0.019	0.120622	0.01	not sig	1	0.25
zip-5	MSTRG.20425	NA	chrV:13269162-13269607	A5SS	soma	0.000977354	-0.018	0.120622	0.008	not sig	1	0.149
ZC513.2	MSTRG.18834	NA	chrV:8056400-8056500	A5SS	soma	0.00011934	-0.462	0.121108	-0.259	not sig	NA	NA
	MSTRG.10186	NA	chrIV:4484867-4485705	A5SS	soma	0.047492	-0.343	0.124668	-0.043	not sig	NA	NA
F17C11.22;F17C11.20	MSTRG.19660	F17C11.20	chrV:10968311-10968390	A5SS	soma	0.00977745	0.18	0.131479	0.082	not sig	1	-0.166
T16H12.3	MSTRG.8779	NA	chrIII:10081954-10082101	A5SS	soma	0.0222206	0.127	0.136211	0.056	not sig	0.985942	-0.01
H43I07.1	MSTRG.17935	NA	chrV:4206490-4206865	A5SS	soma	0.0114203	0.232	0.148494	0.138	not sig	1	0.008
tat-1	MSTRG.9178	tat-1	chrIII:12404784-12404877	A5SS	soma	0.0172719	-0.103	0.157381	0.058	not sig	0.989087	0.014
Y32B12C.5	MSTRG.21244	NA	chrV:16610315-16610416	A5SS	soma	0.0117589	0.083	0.165271	-0.025	not sig	NA	NA
Y102A5C.5	MSTRG.21309	NA	chrV:16928935-16929020	A5SS	soma	0.0202308	0.192	0.16674	-0.076	not sig	1	-0.004
F35E12.9	MSTRG.20544	F35E12.9	chrV:13742481-13743123	A5SS	soma	0.0198565	-0.085	0.17399	-0.079	not sig	1	-0.076
	MSTRG.23138	NA	chrX:4418128-4418264	A5SS	soma	0.0276855	0.345	0.202076	0.058	not sig	NA	NA
F54C1.6	MSTRG.831	NA	chrI:5015146-5015827	A5SS	soma	0.00226516	0.463	0.203317	-0.188	not sig	NA	NA
srw-85	MSTRG.21906	NA	chrV:19430257-19430625	A5SS	soma	0.000977354	-0.224	0.239676	-0.092	not sig	NA	NA
nfi-1	MSTRG.4901	NA	chrII:7537852-7538605	A5SS	soma	0.00461611	-0.035	0.251835	-0.027	not sig	1	0.006
grl-18	MSTRG.18168	grl-18	chrV:5487393-5487514	A5SS	soma	0.000709743	0.449	0.253189	0.153	not sig	NA	NA
daf-37;C30B5.10	MSTRG.4523	NA	chrII:6205445-6206074	A5SS	soma	4.23856e-05	-0.256	0.279756	0.082	not sig	1	0
F17C11.22;F17C11.20	MSTRG.19660	F17C11.20	chrV:10968311-10968422	A5SS	soma	0.0150827	0.1	0.29518	0.056	not sig	1	-0.117
K09C4.1	MSTRG.22872	NA	chrX:3299782-3299857	A5SS	soma	0.00399759	0.103	0.316142	-0.032	not sig	NA	NA
F35B12.10	MSTRG.19900	NA	chrV:11627571-11628554	A5SS	soma	0.0117589	-0.074	0.32826	0.039	not sig	NA	NA
C06C3.5	MSTRG.5366	NA	chrII:9380694-9380795	A5SS	soma	0.00125125	-0.547	0.342389	0.328	not sig	NA	NA
Y48A6C.4;linc-76;Y48A6C.8	MSTRG.8972	NA	chrIII:11126241-11130993	A5SS	soma	0.0117589	-0.574	0.363115	0.121	not sig	1	-0.009
best-23	MSTRG.5002	NA	chrII:7906134-7906535	A5SS	soma	0.00852971	0.1	0.363115	-0.242	not sig	NA	NA
Y43F8B.1	MSTRG.21930	NA	chrV:19535767-19535903	A5SS	soma	0.00566436	-0.146	0.378012	0.056	not sig	1	0.152
F49E2.1	MSTRG.24513	NA	chrX:9563938-9564411	A5SS	soma	0.0211665	0.361	0.382282	0.165	not sig	1	0.167
R10E8.7	MSTRG.21411	NA	chrV:18233019-18233356	A5SS	soma	1.21739e-05	0.603	0.382895	0.164	not sig	1	-0.334
smi-1	MSTRG.6962	NA	chrIII:1879436-1879571	A5SS	soma	0	-0.199	0.42571	0.051	Oocyte Enriched	0.00812273	0.085
clec-75	MSTRG.10071	NA	chrIV:3961330-3961514	A5SS	soma	0.0212814	0.365	0.434188	0.136	not sig	NA	NA
exp-1	MSTRG.4506	NA	chrII:6160066-6160210	A5SS	soma	0.0348962	0.17	0.439538	0.087	not sig	NA	NA
npp-9	MSTRG.7205	npp-9	chrIII:3403081-3403579	A5SS	soma	0.0391558	-0.074	0.474303	0.029	Oocyte Enriched	0.0181935	0.029
acr-5	MSTRG.7884	acr-5	chrIII:6514673-6514978	A5SS	soma	0.00962409	-0.125	0.502726	0.121	not sig	NA	NA
Y62E10A.13	MSTRG.13720	Y62E10A.13	chrIV:13392340-13392601	A5SS	soma	0.0270118	0.041	0.505096	0.022	Oocyte Enriched	0.00219644	-0.088
K04C1.2	MSTRG.25569	K04C1.2	chrX:14238806-14238918	A5SS	soma	0.0350158	0.182	0.513025	0.079	not sig	1	-0.185
Y32B12C.5	MSTRG.21244	NA	chrV:16610346-16610416	A5SS	soma	0.00726085	0.497	0.536894	0.014	not sig	NA	NA
C54F6.18	MSTRG.18691	NA	chrV:7526205-7526449	A5SS	soma	0.0422051	-0.15	0.558201	0.077	not sig	1	0.216
T10B10.4	MSTRG.25802	T10B10.4	chrX:15190462-15190663	A5SS	soma	3.56074e-05	-0.168	0.581673	-0.066	not sig	0.199115	-0.12
Y37F4.15	MSTRG.2224	NA	chrI:10858076-10858991	A5SS	soma	0.00150746	-0.461	0.585695	0.158	not sig	NA	NA
amx-3	MSTRG.22217	amx-3	chrV:20900509-20900964	A5SS	soma	0.0106014	-0.096	0.594945	0.026	not sig	NA	NA
sru-39	MSTRG.19291	sru-39	chrV:9803962-9804121	A5SS	soma	0.00494382	-0.651	0.601842	0.227	not sig	NA	NA
F02H6.3	MSTRG.14461	NA	chrIV:14204056-14204113	A5SS	soma	0.00644688	0.328	0.620806	-0.157	not sig	1	-0.516
dhs-8	MSTRG.6476	NA	chrII:14498025-14498253	A5SS	soma	0.0169596	-0.189	0.62387	-0.062	not sig	1	0.061
	MSTRG.7856	NA	chrIII:6345356-6346159	A5SS	soma	0.0334497	-0.311	0.632835	0.333	not sig	NA	NA
egg-2	MSTRG.8005	egg-2	chrIII:7059710-7060355	A5SS	soma	0.0334614	-0.034	0.636598	0.014	not sig	1	0.025
F58D12.3	MSTRG.20635	NA	chrV:14061745-14061986	A5SS	soma	0.000955928	0.496	0.638568	0.201	not sig	NA	NA
C09D4.4	MSTRG.932	NA	chrI:5483899-5484110	A5SS	soma	0.0169596	0.079	0.674003	-0.022	Oocyte Enriched	4.02688e-05	-0.044
guk-1;hcp-4	MSTRG.593	NA	chrI:3860641-3863257	A5SS	soma	0.0148345	-0.039	0.677985	0.024	Sperm Enriched	0	-0.223
H06I04.6	MSTRG.7145	NA	chrIII:3061744-3061937	A5SS	soma	0.00187086	0.176	0.687888	-0.054	not sig	0.249863	-0.097
F42G2.5	MSTRG.3578	NA	chrII:2416975-2417034	A5SS	soma	0.0156984	-0.141	0.698217	0.048	not sig	NA	NA
hum-2	MSTRG.19171	NA	chrV:9396867-9398160	A5SS	soma	0.0198565	-0.029	0.718811	0.197	Oocyte Enriched	4.09073e-12	0.133
hum-2	MSTRG.19171	NA	chrV:9396867-9398030	A5SS	soma	0.0117589	-0.033	0.727788	0.182	Oocyte Enriched	1.82493e-11	0.14
M04C3.1	MSTRG.21910	NA	chrV:19438576-19439205	A5SS	soma	0.00600432	-0.153	0.734291	0.053	not sig	1	-0.238
K01A2.4;mps-2	MSTRG.3044	NA	chrII:310521-312249	A5SS	soma	0.0417855	-0.031	0.777376	0.011	not sig	1	0.76
sqrd-1;21ur-10097	MSTRG.14469	sqrd-1	chrIV:14222333-14222627	A5SS	soma	0.00841998	-0.207	0.785144	-0.088	not sig	1	0.367
lgc-41;C39B10.10	MSTRG.24726	NA	chrX:10457061-10457259	A5SS	soma	0.0202308	0.332	0.795289	0.074	not sig	NA	NA
nhr-133	MSTRG.17567	NA	chrV:2211769-2211832	A5SS	soma	0.00249593	-0.149	0.832265	0.027	not sig	1	-0.357
moc-2	MSTRG.18442	moc-2	chrV:6503290-6503591	A5SS	soma	0.018405	-0.028	0.845803	-0.009	not sig	1	0.009
fli-1	MSTRG.8408	NA	chrIII:8675331-8676109	A5SS	soma	0.00977745	-0.16	0.857127	-0.14	not sig	1	0.038
Y20C6A.1	MSTRG.21529	NA	chrV:17376689-17376805	A5SS	soma	0.00119663	0.368	0.857127	0	not sig	NA	NA
fbxa-37	MSTRG.6844	NA	chrIII:1286171-1286787	A5SS	soma	0.0222206	0.072	0.857127	-0.019	not sig	NA	NA
mig-17	MSTRG.19833	mig-17	chrV:11447493-11447772	A5SS	soma	0.0310405	-0.091	0.857127	-0.011	not sig	NA	NA
C46H11.2	MSTRG.840	NA	chrI:5051907-5052187	A5SS	soma	0.0202308	-0.067	0.869379	0.015	not sig	NA	NA
nhr-21	MSTRG.4846	NA	chrII:7347373-7347527	A5SS	soma	0.00726085	-0.176	0.875063	-0.056	not sig	1	0.05
unc-2	MSTRG.22739	NA	chrX:2723234-2723461	A5SS	soma	0.000977354	0.325	0.893898	-0.089	not sig	1	-0.47
plc-1	MSTRG.24803	plc-1	chrX:10807933-10808102	A5SS	soma	0.0128956	-0.14	0.965287	0.085	not sig	NA	NA
F40E10.6	MSTRG.25674	NA	chrX:14704666-14704697	A5SS	soma	0.0265492	0.067	0.967571	0.014	not sig	1	-0.008
bca-2	MSTRG.16940	NA	chrIV:17099242-17099454	A5SS	soma	0.00566436	-0.021	0.977595	0.004	Sperm Enriched	0.0376432	-0.017
D2023.3	MSTRG.19958	NA	chrV:11803355-11804078	A5SS	soma	0.0125662	-0.099	0.977952	-0.017	not sig	NA	NA
F38C2.4	MSTRG.16498	NA	chrIV:16271414-16271661	A5SS	soma	0.00977745	0.334	0.983857	-0.066	not sig	NA	NA
F45H10.5	MSTRG.6299	NA	chrII:13502425-13502671	A5SS	soma	2.06108e-07	0.89	0.998496	-0.137	not sig	NA	NA
hum-2	MSTRG.19171	NA	chrV:9396867-9397443	A5SS	soma	0.0015243	-0.052	1	-0.005	Oocyte Enriched	1.65574e-11	0.156
puf-9	MSTRG.23497	NA	chrX:5844092-5844609	A5SS	soma	0.0346748	-0.089	1	0.008	Oocyte Enriched	1.30584e-05	0.32
C56E6.2;C56E6.7;toe-2	MSTRG.4619	NA	chrII:6517812-6517928	A5SS	soma	0.0024955	0.1	1	0.002	not sig	0.11091	0.009
ucr-2.1	MSTRG.25080	sams-1	chrX:12018428-12018576	A5SS	soma	0.0275822	-0.044	1	-0.006	not sig	0.168136	-0.038
Y32B12B.2	MSTRG.21236	NA	chrV:16543787-16544202	A5SS	soma	0.0159999	-0.039	1	0.007	not sig	0.719275	0.006
clec-149	MSTRG.6739	NA	chrIII:823856-824373	A5SS	soma	6.91687e-08	-1	1	0.003	not sig	1	0.016
daao-1	MSTRG.9811	NA	chrIV:2614193-2614285	A5SS	soma	1.21739e-05	0.191	1	-0.012	not sig	1	0.25
Y60A3A.16	MSTRG.22020	NA	chrV:19922390-19922600	A5SS	soma	0.00045573	-0.193	1	0.018	not sig	1	0.011
lin-10	MSTRG.1541	NA	chrI:8113229-8113893	A5SS	soma	0.000977354	-0.064	1	-0.001	not sig	1	-0.035
clr-1	MSTRG.4302	clr-1	chrII:5468883-5469174	A5SS	soma	0.00105112	-0.144	1	-0.003	not sig	1	0.002
F10G8.2	MSTRG.2032	NA	chrI:10022277-10022566	A5SS	soma	0.00182449	0.366	1	-0.011	not sig	1	0.313
M04C3.1	MSTRG.21910	NA	chrV:19438676-19439205	A5SS	soma	0.00286614	-0.278	1	0.038	not sig	1	-0.5
svh-2	MSTRG.23702	svh-2	chrX:6558498-6558647	A5SS	soma	0.00604388	-0.091	1	-0.007	not sig	1	-0.081
blos-1	MSTRG.8811	blos-1	chrIII:10211659-10211822	A5SS	soma	0.00690082	-0.011	1	0	not sig	1	-0.002
svh-2	MSTRG.23702	svh-2	chrX:6558498-6558651	A5SS	soma	0.0079988	0.316	1	0.015	not sig	1	-0.196
istr-1	MSTRG.20256	istr-1	chrV:12699406-12699449	A5SS	soma	0.00962409	0.058	1	-0.02	not sig	1	0.021
tbc-11	MSTRG.22383	NA	chrX:926551-926769	A5SS	soma	0.0101025	-0.098	1	-0.006	not sig	1	-0.026
T23E7.2	MSTRG.26257	NA	chrX:17679251-17679669	A5SS	soma	0.0111256	-0.218	1	-0.045	not sig	1	-0.014
Y71A12B.13	MSTRG.2790	NA	chrI:13969404-13969567	A5SS	soma	0.0117589	0.424	1	-0.119	not sig	1	-0.309
F35E12.10	MSTRG.20545	NA	chrV:13748685-13748777	A5SS	soma	0.0148345	0.195	1	0.017	not sig	1	0.61
ZC123.4	MSTRG.125	ZC123.4	chrI:845820-845999	A5SS	soma	0.0154432	-0.128	1	0.001	not sig	1	0.054
mel-32;C05D11.13	MSTRG.7870	NA	chrIII:6442964-6443778	A5SS	soma	0.0197625	0.243	1	0.003	not sig	1	-0.27
Y39A3CL.7	MSTRG.6958	NA	chrIII:1825155-1825411	A5SS	soma	0.0198565	-0.059	1	-0.001	not sig	1	-0.006
F37H8.6	MSTRG.5813	NA	chrII:11176611-11176749	A5SS	soma	0.0222206	0.289	1	0.104	not sig	1	0.159
F32B5.6	MSTRG.376	NA	chrI:2670482-2670797	A5SS	soma	0.0228606	-0.079	1	-0.004	not sig	1	-0.009
feh-1	MSTRG.7067	NA	chrIII:2559268-2559476	A5SS	soma	0.0241632	0.26	1	0.046	not sig	1	0.124
F34H10.3	MSTRG.24532	NA	chrX:9634408-9635025	A5SS	soma	0.0256204	-0.031	1	-0.005	not sig	1	0.048
nhr-238	MSTRG.17452	NA	chrV:1629350-1629471	A5SS	soma	0.0292267	0.147	1	0.006	not sig	1	1
prx-11	MSTRG.2615	NA	chrI:12971119-12974404	A5SS	soma	0.0308215	0.259	1	-0.05	not sig	1	0.018
C15A11.7	MSTRG.1411	C15A11.7	chrI:7405831-7405944	A5SS	soma	0.0310405	-0.087	1	0.017	not sig	1	-0.311
T25B2.2	MSTRG.23602	NA	chrX:6172428-6172563	A5SS	soma	0.0310405	0.114	1	0.003	not sig	1	0.047
prx-11	MSTRG.2615	NA	chrI:12971119-12974305	A5SS	soma	0.0313654	0.255	1	-0.044	not sig	1	0.019
F23F12.3	MSTRG.7880	F23F12.3	chrIII:6506306-6506652	A5SS	soma	0.0331119	-0.431	1	0.077	not sig	1	0.601
tnt-4	MSTRG.17517	NA	chrV:1992635-1992821	A5SS	soma	0.0344937	-0.121	1	-0.006	not sig	1	-0.5
tre-1	MSTRG.1208	NA	chrI:6554974-6555469	A5SS	soma	0.0485768	-0.009	1	-0.003	not sig	1	0.001
mdl-1	MSTRG.23756	NA	chrX:6742688-6743209	A5SS	soma	0.049275	-0.026	1	-0.004	not sig	1	0.019
Y69H2.9	MSTRG.21748	NA	chrV:18703541-18703633	A5SS	soma	3.23519e-10	0.211	1	0.022	not sig	NA	NA
Y97E10AR.2	MSTRG.18817	NA	chrV:7999222-7999768	A5SS	soma	1.21739e-05	-0.425	1	-0.018	not sig	NA	NA
K08D8.4	MSTRG.13606	K08D8.4	chrIV:12908030-12908436	A5SS	soma	0.00129329	-0.09	1	-0.006	not sig	NA	NA
F31F4.1	MSTRG.17312	NA	chrV:684905-685006	A5SS	soma	0.00187086	0.177	1	-0.012	not sig	NA	NA
mlt-11	MSTRG.22168	NA	chrV:20669026-20669771	A5SS	soma	0.00187086	-0.544	1	0.029	not sig	NA	NA
clec-26	MSTRG.21282	NA	chrV:16848610-16848921	A5SS	soma	0.00320445	-0.307	1	-0.062	not sig	NA	NA
D2085.7	MSTRG.5194	NA	chrII:8641949-8644601	A5SS	soma	0.00449149	-0.375	1	-0.092	not sig	NA	NA
Y32B12C.5	MSTRG.21244	NA	chrV:16610347-16610416	A5SS	soma	0.00659429	0.381	1	-0.006	not sig	NA	NA
fbxa-82	MSTRG.20910	fbxa-82	chrV:15052318-15052402	A5SS	soma	0.00712968	-0.188	1	0.02	not sig	NA	NA
cul-1;D2045.9	MSTRG.8856	NA	chrIII:10474752-10476247	A5SS	soma	0.00977745	-0.214	1	-0.062	not sig	NA	NA
tts-1	MSTRG.22474	NA	chrX:1504768-1504841	A5SS	soma	0.0111256	-0.069	1	0.01	not sig	NA	NA
math-18	MSTRG.3524	NA	chrII:2154753-2155055	A5SS	soma	0.0138087	-0.382	1	-0.078	not sig	NA	NA
ZC47.8	MSTRG.6841	NA	chrIII:1278838-1279027	A5SS	soma	0.0148345	-0.134	1	-0.007	not sig	NA	NA
tmem-231	MSTRG.12390	tmem-231	chrIV:8426997-8427194	A5SS	soma	0.0154432	0.072	1	0.013	not sig	NA	NA
grl-14	MSTRG.22205	grl-14	chrV:20826925-20827070	A5SS	soma	0.0154432	0.497	1	0.114	not sig	NA	NA
	MSTRG.21140	NA	chrV:16132916-16133456	A5SS	soma	0.0154432	0.319	1	-0.133	not sig	NA	NA
	MSTRG.19864	NA	chrV:11513468-11513567	A5SS	soma	0.022069	0.248	1	-0.255	not sig	NA	NA
srw-85;C25F9.t5	MSTRG.21906	NA	chrV:19431176-19432157	A5SS	soma	0.0236215	0.349	1	0.006	not sig	NA	NA
nhr-202	MSTRG.17279	NA	chrV:464754-465064	A5SS	soma	0.0236215	-0.155	1	0.03	not sig	NA	NA
F42G2.5	MSTRG.3578	NA	chrII:2416859-2417034	A5SS	soma	0.0254138	0.39	1	-0.068	not sig	NA	NA
	MSTRG.24674	NA	chrX:10215530-10215971	A5SS	soma	0.0292267	-0.5	1	-0.082	not sig	NA	NA
molo-1	MSTRG.7673	NA	chrIII:5576499-5576620	A5SS	soma	0.0343843	0.253	1	0.024	not sig	NA	NA
fbxa-37	MSTRG.6844	NA	chrIII:1286171-1286672	A5SS	soma	0.0379841	0.061	1	-0.032	not sig	NA	NA
hpo-30	MSTRG.20120	NA	chrV:12309243-12309509	A5SS	soma	0.0436657	0.085	1	-0.003	not sig	NA	NA
	MSTRG.3387	NA	chrII:1657354-1659831	A5SS	soma	0.00187086	-0.464	NA	NA	not sig	NA	NA
ZK546.19;mdt-4	MSTRG.4139	NA	chrII:4941362-4942352	A5SS	soma	0.0202308	-0.351	NA	NA	not sig	NA	NA
C18D4.8	MSTRG.21596	NA	chrV:17544685-17545015	RI	soma	0.000891673	-0.285	0.0569104	-0.116	not sig	NA	NA
F08H9.4;srz-97	MSTRG.20743	NA	chrV:14464242-14465109	RI	soma	0.00546777	0.499	0.0579864	0.197	not sig	NA	NA
Y71A12B.13	MSTRG.2790	NA	chrI:13961633-13962031	RI	soma	0.000391077	0.567	0.0675121	-0.154	not sig	1	0.02
sur-7	MSTRG.26038	NA	chrX:16377620-16378097	RI	soma	0.0270234	0.354	0.0675149	-0.314	not sig	1	0.017
K06H7.2	MSTRG.8243	NA	chrIII:8095598-8096387	RI	soma	0.0202596	-0.041	0.0699584	0.03	not sig	1	0.014
grsp-2	MSTRG.12474	NA	chrIV:8818117-8818554	RI	soma	0.00156904	-0.409	0.0730904	-0.158	not sig	1	-0.162
T25B2.2	MSTRG.23602	NA	chrX:6173378-6173748	RI	soma	0.0244138	-0.094	0.0756298	-0.145	not sig	1	0.226
B0348.2	MSTRG.17213	NA	chrV:45309-45646	RI	soma	1.65003e-09	-0.318	0.0871024	0.056	not sig	NA	NA
F19F10.1	MSTRG.18704	F19F10.1	chrV:7563664-7564397	RI	soma	0.000109105	-0.438	0.0948957	0.249	not sig	NA	NA
sulp-2	MSTRG.23414	NA	chrX:5599061-5602534	RI	soma	0.0339317	0.07	0.0951483	0.049	not sig	1	0.081
F35E12.9	MSTRG.20544	F35E12.9	chrV:13741606-13743123	RI	soma	0.000428386	0.182	0.0972985	-0.083	not sig	1	-0.03
max-2	MSTRG.6236	NA	chrII:13018447-13018980	RI	soma	0.0257063	0.081	0.100833	-0.059	not sig	NA	NA
T23F11.6	MSTRG.7462	pqn-29	chrIII:4647463-4648215	RI	soma	2.38694e-11	-0.048	0.109648	-0.017	not sig	1	-0.5
cyc-2.1;rpl-20	MSTRG.10250	tctn-1	chrIV:4748261-4749514	RI	soma	0.00252812	0.46	0.123295	-0.189	not sig	0.492715	-0.02
K07A12.4	MSTRG.1665	K07A12.4	chrI:8690418-8690729	RI	soma	0.00691496	0.089	0.129556	0.044	not sig	1	0.003
nhr-212;nhr-211	MSTRG.17286	NA	chrV:486745-487212	RI	soma	0.0259357	-0.187	0.135756	0.172	not sig	NA	NA
Y22D7AL.7	MSTRG.6909	NA	chrIII:1579050-1580857	RI	soma	0.018221	-0.03	0.136018	0.025	Sperm Enriched	0.012222	-0.031
nhr-123	MSTRG.17276	nhr-123	chrV:453229-453746	RI	soma	0.0132731	-0.287	0.158044	-0.18	not sig	NA	NA
tiar-1	MSTRG.4374	NA	chrII:5714061-5714356	RI	soma	0.000322314	0.313	0.16118	0.22	not sig	1	-0.137
Y71A12B.13;Y71A12B.14;Y71A12B.21	MSTRG.2790	NA	chrI:13969404-13971878	RI	soma	0.0325869	0.361	0.164984	-0.197	not sig	1	0.017
Y38H6C.9	MSTRG.22135	NA	chrV:20520820-20521338	RI	soma	0.0272305	0.481	0.167837	0.373	not sig	NA	NA
parg-1	MSTRG.12463	NA	chrIV:8747765-8748271	RI	soma	2.36586e-05	-0.177	0.179353	-0.119	Oocyte Enriched	0.000243208	0.101
ZK470.2	MSTRG.23067	ZK470.2	chrX:4146447-4147018	RI	soma	0.0133841	0.316	0.186437	0.008	not sig	0.134841	0.044
Y34F4.5;chin-1	MSTRG.6786	NA	chrIII:1030978-1031874	RI	soma	0.0320896	-0.239	0.186437	-0.152	not sig	NA	NA
aly-3	MSTRG.13406	aly-3	chrIV:12123738-12124373	RI	soma	0.0364198	0.027	0.202182	0.02	Oocyte Enriched	0	-0.052
F39F10.4	MSTRG.26144	NA	chrX:16902674-16905060	RI	soma	0.0138546	-0.164	0.202182	0.125	not sig	NA	NA
tcer-1	MSTRG.4773	NA	chrII:7046943-7048988	RI	soma	3.96647e-05	0.101	0.20512	-0.042	not sig	0.0514296	-0.245
H05C05.4	MSTRG.7125	NA	chrIII:2945007-2946710	RI	soma	0.0130612	-0.017	0.210396	-0.009	not sig	0.879671	-0.247
F53E4.1	MSTRG.21043	NA	chrV:15657809-15659067	RI	soma	0.0152137	0.012	0.218209	0.01	not sig	1	0
fipp-1;neg-1	MSTRG.17955	fipp-1	chrV:4372674-4373811	RI	soma	0.0462835	-0.202	0.234517	-0.061	Oocyte Enriched	0	0.253
E03H4.8	MSTRG.2508	NA	chrI:12426355-12426859	RI	soma	3.08218e-05	0.539	0.245208	0.389	not sig	1	0.223
sri-23;F59E11.2	MSTRG.19066	NA	chrV:9001133-9001607	RI	soma	0.00133287	-0.215	0.245208	0.205	not sig	NA	NA
F11C1.1;F11C1.7	MSTRG.25277	NA	chrX:12989838-12990300	RI	soma	0.0241031	-0.032	0.255976	0.02	not sig	NA	NA
srw-85	MSTRG.21906	NA	chrV:19430028-19430625	RI	soma	6.68944e-05	0.17	0.26052	-0.053	not sig	NA	NA
spk-1	MSTRG.8609	spk-1	chrIII:9462106-9462808	RI	soma	0.013605	0.111	0.263266	0.06	Sperm Enriched	1.0066e-13	0.115
F26F12.3	MSTRG.18269	NA	chrV:5840646-5843654	RI	soma	0.00191603	0.59	0.293938	0.235	not sig	NA	NA
F22F7.2	MSTRG.17550	NA	chrV:2126918-2127267	RI	soma	0.000391077	0.538	0.310403	-0.335	not sig	NA	NA
F14D2.15;bath-28	MSTRG.3786	NA	chrII:3343424-3343983	RI	soma	0.0485208	-0.289	0.315661	0.048	Sperm Enriched	0.000313564	-0.089
cblc-1;ZK546.19;mdt-4	MSTRG.4139	NA	chrII:4941055-4942352	RI	soma	0.0179582	-0.305	0.315661	0.161	not sig	1	0.059
acs-22	MSTRG.24361	NA	chrX:8935552-8935923	RI	soma	5.7178e-09	0.569	0.327607	-0.161	not sig	NA	NA
F14D7.6	MSTRG.20697	NA	chrV:14305653-14306202	RI	soma	6.56407e-11	-0.263	0.329955	-0.192	not sig	1	0.566
Y87G2A.18	MSTRG.2714	Y87G2A.18	chrI:13514075-13514329	RI	soma	0.0445691	-0.027	0.329955	-0.025	not sig	1	-0.008
Y38C1AA.9	MSTRG.9416	NA	chrIV:157070-157901	RI	soma	0.0283664	0.026	0.329955	-0.013	not sig	NA	NA
erp-44.1	MSTRG.918	NA	chrI:5420005-5420731	RI	soma	0.0182498	0.313	0.341516	0.165	not sig	1	-0.009
Y53H1A.2	MSTRG.2286	NA	chrI:11223901-11224835	RI	soma	0.000578525	-0.658	0.377171	0.363	not sig	NA	NA
C46H11.10	MSTRG.841	NA	chrI:5053897-5054338	RI	soma	0.0459076	-0.179	0.379189	-0.042	not sig	NA	NA
mpst-3	MSTRG.20860	NA	chrV:14895798-14896052	RI	soma	2.67147e-06	0.296	0.38189	-0.114	not sig	1	-0.058
tag-234;F55C12.19	MSTRG.4434	NA	chrII:5865466-5866226	RI	soma	0.00914373	-0.116	0.382771	-0.061	not sig	NA	NA
C53B7.3	MSTRG.23778	C53B7.3	chrX:6845335-6845976	RI	soma	0.00301782	0.019	0.393658	-0.015	not sig	1	0.178
F45D11.1	MSTRG.3219	NA	chrII:1022488-1023528	RI	soma	0.000712185	-0.124	0.393658	0.079	not sig	NA	NA
nhr-144	MSTRG.19063	NA	chrV:8976490-8977065	RI	soma	0.0108001	0.197	0.415105	0.069	not sig	1	0.109
oig-2;F18A11.5	MSTRG.6236	NA	chrII:13008053-13009294	RI	soma	0.00897107	-0.2	0.425807	0.112	not sig	NA	NA
D1086.11	MSTRG.20638	NA	chrV:14076145-14076504	RI	soma	0.0054113	0.133	0.435948	-0.06	not sig	1	-0.117
ugt-17	MSTRG.19363	NA	chrV:10104327-10104695	RI	soma	9.86079e-05	0.106	0.43849	-0.034	not sig	1	-0.014
hrg-5	MSTRG.13097	NA	chrIV:11028824-11029103	RI	soma	0.0246175	-0.202	0.440919	-0.216	not sig	NA	NA
C49A9.9	MSTRG.11608	C49A9.9	chrIV:6218081-6218997	RI	soma	2.04412e-05	0.033	0.447791	0.012	not sig	1	0
T26H5.8	MSTRG.20993	NA	chrV:15431428-15431695	RI	soma	0.00677124	0.132	0.450208	0.052	not sig	NA	NA
atf-2	MSTRG.5217	NA	chrII:8753431-8753942	RI	soma	0.0364583	-0.07	0.45741	0.025	not sig	1	0.001
C34B7.1	MSTRG.1584	NA	chrI:8331990-8332314	RI	soma	3.55425e-05	0.132	0.48103	0.039	not sig	1	-0.066
acs-5	MSTRG.9348	NA	chrIII:13542731-13543341	RI	soma	0.0210645	0.327	0.484306	0.127	not sig	NA	NA
T19D12.2	MSTRG.4668	NA	chrII:6664374-6664635	RI	soma	0.0077572	0.081	0.492534	0.046	not sig	1	0.416
F19G12.9	MSTRG.22450	NA	chrX:1419502-1419778	RI	soma	5.19828e-06	0.163	0.500577	0.051	not sig	1	-0.082
F40F8.1	MSTRG.5798	NA	chrII:11127709-11128559	RI	soma	0.0230722	0.034	0.503467	0.017	Oocyte Enriched	0.00419284	-0.063
E01G4.3	MSTRG.6293	NA	chrII:13465338-13467169	RI	soma	0.0490521	0.181	0.536207	-0.163	not sig	NA	NA
snx-6	MSTRG.21357	snx-6	chrV:17977265-17977543	RI	soma	2.22044e-05	-0.072	0.548659	-0.016	Sperm Enriched	3.50043e-08	-0.051
F09F3.8	MSTRG.20575	NA	chrV:13870063-13870494	RI	soma	0.000578525	-0.486	0.55785	0.226	not sig	NA	NA
nhr-210	MSTRG.17291	NA	chrV:519285-519601	RI	soma	0.0361731	0.146	0.562822	0.068	not sig	NA	NA
Y39D8A.1	MSTRG.17268	NA	chrV:419916-420511	RI	soma	1.83143e-06	-0.485	0.568228	-0.152	not sig	NA	NA
nhr-110	MSTRG.17451	NA	chrV:1623431-1623736	RI	soma	0.0275457	0.099	0.568228	0.037	not sig	NA	NA
rgs-7	MSTRG.22923	NA	chrX:3552546-3553073	RI	soma	1.9957e-06	-0.144	0.581047	0.017	not sig	1	0.003
xpa-1	MSTRG.1354	NA	chrI:7160334-7160917	RI	soma	0.00789067	-0.02	0.60581	-0.009	not sig	0.0618437	-0.009
D2085.7	MSTRG.5194	NA	chrII:8641949-8644766	RI	soma	0.00213606	-0.366	0.60581	-0.26	not sig	NA	NA
Y17G7B.20	MSTRG.6044	Y17G7B.20	chrII:11977821-11978922	RI	soma	0.0144586	0.081	0.635504	0.028	not sig	1	0.01
C39E9.8	MSTRG.13651	C39E9.8	chrIV:13081109-13082436	RI	soma	0.0420742	0.007	0.635504	0.002	not sig	1	-0.007
Y45F10B.13	MSTRG.13759	Y45F10B.13	chrIV:13559393-13559617	RI	soma	0.000291858	0.278	0.638263	-0.081	not sig	1	0.189
W03F8.3;W03F8.6	MSTRG.10557	W03F8.6	chrIV:5185648-5185897	RI	soma	0.00969043	0.16	0.651539	-0.069	not sig	NA	NA
K02C4.2	MSTRG.5035	NA	chrII:8076211-8076836	RI	soma	0.0388272	-0.045	0.666318	-0.017	not sig	NA	NA
K02A6.3	MSTRG.24169	NA	chrX:8229819-8230177	RI	soma	0.000704926	0.222	0.67042	0.038	not sig	1	-0.57
F28B12.1	MSTRG.4450	F28B12.1	chrII:5943258-5943995	RI	soma	0.00930817	0.062	0.67042	0.027	not sig	1	-0.086
nxf-1	MSTRG.20727	NA	chrV:14413778-14414031	RI	soma	0.000126394	-0.183	0.672695	0.043	not sig	1	-0.015
pat-12	MSTRG.6725	NA	chrIII:729985-730437	RI	soma	0.00685085	0.098	0.672695	-0.033	not sig	1	-0.094
lpr-1	MSTRG.81	lpr-1	chrI:560701-561671	RI	soma	0.0459568	0.011	0.692759	0.004	not sig	1	0.143
T12G3.2	MSTRG.13383	NA	chrIV:12043337-12043735	RI	soma	0.00382983	0.205	0.702141	0.055	Oocyte Enriched	4.2283e-09	-0.207
C01C10.2	MSTRG.23944	C01C10.2	chrX:7437863-7438571	RI	soma	0.0031415	0.078	0.712071	-0.02	not sig	NA	NA
ddo-2;F25E5.8	MSTRG.18670	F25E5.8	chrV:7435412-7436962	RI	soma	0.0187833	0.016	0.716351	-0.006	not sig	0.108418	-0.208
K07F5.16	MSTRG.12755	NA	chrIV:9864323-9864607	RI	soma	0.000142166	-0.129	0.716351	-0.041	not sig	1	-0.031
T25B2.4	MSTRG.23610	NA	chrX:6177883-6178471	RI	soma	0.0169095	-0.244	0.723651	-0.046	not sig	NA	NA
ttr-23	MSTRG.19511	ttr-23	chrV:10589398-10590266	RI	soma	0.00993472	-0.02	0.726743	0.007	not sig	1	-0.333
Y34F4.4;Y34F4.7	MSTRG.6785	NA	chrIII:1024530-1026589	RI	soma	0.0275141	-0.104	0.75565	-0.038	not sig	1	0.5
farl-11	MSTRG.4784	NA	chrII:7102617-7104093	RI	soma	3.7234e-10	0.261	0.759891	0.027	not sig	1	0.002
C37E2.2	MSTRG.25553	NA	chrX:14176236-14176469	RI	soma	0.0129652	-0.309	0.759891	0.177	not sig	NA	NA
pals-31	MSTRG.17305	NA	chrV:636898-637533	RI	soma	0.00241729	0.211	0.790239	0.093	not sig	1	-0.381
E02H9.1	MSTRG.7060	NA	chrIII:2469248-2469452	RI	soma	0.000298308	-0.264	0.795493	0.117	not sig	1	0.2
spp-22	MSTRG.23878	NA	chrX:7211704-7211977	RI	soma	0	-0.187	0.798106	0.006	not sig	1	0.25
math-27;math-3;F36H5.14	MSTRG.3428	NA	chrII:1776125-1776583	RI	soma	3.36851e-12	0.21	0.812798	-0.032	not sig	1	-0.667
erv-46	MSTRG.25908	NA	chrX:15616426-15616808	RI	soma	0.0167793	0.304	0.814326	0.244	not sig	1	0.26
D2096.12;aagr-1;21ur-14060	MSTRG.12378	NA	chrIV:8365814-8366918	RI	soma	0.0282666	0.294	0.81632	0.042	not sig	1	-0.281
T05E12.3	MSTRG.21325	NA	chrV:17077733-17077989	RI	soma	0.0193422	0.07	0.818118	-0.01	not sig	NA	NA
srx-84	MSTRG.19890	NA	chrV:11599797-11600442	RI	soma	0.0154322	0.603	0.848833	0.096	not sig	NA	NA
C23H5.8	MSTRG.9725	C23H5.8	chrIV:2111893-2112494	RI	soma	0.0121688	-0.022	0.855051	0.006	not sig	0.382639	-0.011
arrd-17	MSTRG.9361	NA	chrIII:13630150-13631329	RI	soma	0.0252124	0.086	0.855385	0.018	not sig	1	-0.217
gcy-28;mrpl-19	MSTRG.717	NA	chrI:4508034-4508941	RI	soma	0.0110669	0.156	0.867737	0.047	not sig	1	-0.002
mec-14	MSTRG.8050	NA	chrIII:7190839-7191252	RI	soma	0.0466177	0.292	0.884452	0.043	not sig	1	-0.199
M153.1	MSTRG.25134	NA	chrX:12148154-12148913	RI	soma	0.0197446	0.198	0.884452	0.039	not sig	NA	NA
F41C6.4	MSTRG.23783	NA	chrX:6873705-6874417	RI	soma	0.0236384	0.208	0.885512	-0.028	not sig	NA	NA
ZC204.12	MSTRG.3387	NA	chrII:1657158-1659831	RI	soma	0.00175979	-0.39	0.886835	0.082	not sig	NA	NA
ugt-29	MSTRG.17318	ugt-29	chrV:698993-699629	RI	soma	0.0202596	0.215	0.897613	0.066	not sig	NA	NA
C26C6.10;C26C6.9	MSTRG.1428	NA	chrI:7513575-7514302	RI	soma	0.00252876	0.405	0.918048	-0.206	not sig	1	-0.01
F53A10.2	MSTRG.3251	NA	chrII:1229761-1230782	RI	soma	0.0182498	-0.061	0.93263	0.005	not sig	1	-0.035
C08B6.2	MSTRG.19362	NA	chrV:10104955-10106196	RI	soma	0.0101728	-0.17	0.93263	-0.104	not sig	NA	NA
linc-103	MSTRG.23629	NA	chrX:6256968-6258999	RI	soma	0.0138546	-0.473	0.954234	-0.093	not sig	NA	NA
Y37E11B.2;Y37E11B.16;Y37E11B.1	MSTRG.9988	Y37E11B.2	chrIV:3578625-3578960	RI	soma	0.000246391	0.187	0.955905	-0.035	not sig	1	-0.219
srh-237	MSTRG.21329	NA	chrV:17091117-17091348	RI	soma	0.0481479	0.049	0.961968	-0.018	not sig	1	-0.126
swp-1	MSTRG.7705	NA	chrIII:5704477-5705325	RI	soma	0.0461926	0.113	0.967104	0.035	Oocyte Enriched	3.7802e-08	-0.066
syx-7;21ur-14332;fcp-1	MSTRG.1745	NA	chrI:9003863-9005157	RI	soma	0.0182498	-0.1	0.96932	-0.083	Oocyte Enriched	0	0.913
T09F5.12	MSTRG.20944	NA	chrV:15165172-15166199	RI	soma	0.000298308	-0.12	0.96932	0.026	not sig	NA	NA
F16B4.5	MSTRG.17443	NA	chrV:1589324-1591538	RI	soma	0.00241728	0.284	0.976587	0.047	not sig	0.554222	-0.129
srw-85;C25F9.t5	MSTRG.21906	NA	chrV:19431061-19432157	RI	soma	0.000380327	0.629	0.980961	0.124	not sig	NA	NA
yif-1	MSTRG.19348	NA	chrV:10050046-10050719	RI	soma	0.0320896	0.074	0.992107	0.037	not sig	0.159805	0.017
atf-7	MSTRG.7421	NA	chrIII:4492651-4493101	RI	soma	1.03278e-08	-0.196	1	-0.012	Oocyte Enriched	0	0.231
mlcd-1;idhg-1	MSTRG.7439	NA	chrIII:4568015-4568786	RI	soma	0.00729999	0.204	1	-0.053	Sperm Enriched	0	0.679
cids-2	MSTRG.1697	NA	chrI:8807289-8807524	RI	soma	0.0217683	-0.153	1	0.037	Oocyte Enriched	1.8368e-11	0.139
mak-1	MSTRG.5216	mak-1	chrII:8746354-8746802	RI	soma	0.00497672	0.032	1	-0.002	Oocyte Enriched	7.24084e-10	-0.084
ekl-1;F22D6.14	MSTRG.1337	NA	chrI:7097978-7098695	RI	soma	0.0320896	0.208	1	-0.141	Sperm Enriched	1.02981e-06	0.21
B0495.8	MSTRG.4945	NA	chrII:7706780-7707193	RI	soma	0.00315273	0.293	1	-0.042	Oocyte Enriched	0.0266545	-0.288
parg-1	MSTRG.12463	NA	chrIV:8747322-8747936	RI	soma	0.00032367	0.274	1	-0.05	not sig	0.0773375	0.01
F25H2.6	MSTRG.2150	NA	chrI:10554365-10554650	RI	soma	0.0126138	0.044	1	0.012	not sig	0.225028	0.007
C30E1.9	MSTRG.26148	NA	chrX:16929913-16932039	RI	soma	7.5769e-09	0.145	1	-0.006	not sig	0.458237	0.101
F53F1.6	MSTRG.20462	NA	chrV:13416774-13416940	RI	soma	0	0.186	1	-0.007	not sig	1	0.04
lec-9	MSTRG.26253	NA	chrX:17600411-17600687	RI	soma	0	-0.064	1	-0.528	not sig	1	-1
D1086.11	MSTRG.20638	NA	chrV:14075480-14075678	RI	soma	0	0.058	1	0.001	not sig	1	-0.002
T10B10.4	MSTRG.25802	T10B10.4	chrX:15190462-15190663	RI	soma	0	-0.507	1	0.014	not sig	1	0.013
F11F1.1	MSTRG.9317	NA	chrIII:13396084-13396894	RI	soma	1.17791e-08	-0.432	1	-0.015	not sig	1	0.019
F56D5.6;F56D5.4	MSTRG.12614	NA	chrIV:9403019-9403265	RI	soma	1.9957e-06	0.172	1	-0.008	not sig	1	0.014
parg-1	MSTRG.12463	NA	chrIV:8746381-8747418	RI	soma	3.45009e-06	0.248	1	0.044	not sig	1	0.114
acox-1.5	MSTRG.8637	NA	chrIII:9591346-9592192	RI	soma	4.00236e-06	-0.032	1	0.004	not sig	1	0.344
tts-1	MSTRG.22474	NA	chrX:1504474-1504841	RI	soma	4.51193e-06	0.029	1	-0.001	not sig	1	-0.036
fli-1	MSTRG.8408	NA	chrIII:8675144-8676109	RI	soma	1.04247e-05	-0.653	1	-0.06	not sig	1	0.005
T24B8.4	MSTRG.5299	NA	chrII:9065183-9065713	RI	soma	1.22076e-05	-0.566	1	-0.132	not sig	1	0.417
sptf-1	MSTRG.2102	NA	chrI:10371162-10371699	RI	soma	1.54762e-05	0.151	1	0.026	not sig	1	-0.333
try-10;F15B9.15	MSTRG.20359	NA	chrV:13011658-13011905	RI	soma	3.10022e-05	-0.131	1	0.004	not sig	1	0.134
gnrr-2	MSTRG.20726	gnrr-2	chrV:14411403-14412027	RI	soma	3.10691e-05	-0.286	1	-0.028	not sig	1	-0.014
R10E8.7;R10E8.10;R10E8.3	MSTRG.21411	NA	chrV:18233019-18234869	RI	soma	3.55425e-05	0.576	1	-0.001	not sig	1	-0.206
F13H10.6;ndx-9	MSTRG.13090	F13H10.6	chrIV:11009816-11010103	RI	soma	3.96647e-05	0.097	1	0.012	not sig	1	-0.099
C16C8.13;C16C8.12	MSTRG.3820	NA	chrII:3452249-3452811	RI	soma	4.78212e-05	-0.713	1	-0.333	not sig	1	-0.189
Y119C1B.10	MSTRG.727	Y119C1B.10	chrI:4555876-4556163	RI	soma	0.000277267	-0.148	1	0.016	not sig	1	-0.478
gar-1;C15B12.11	MSTRG.23688	NA	chrX:6482804-6483187	RI	soma	0.000277267	0.274	1	0.007	not sig	1	-0.074
atl-1	MSTRG.19240	NA	chrV:9645380-9645712	RI	soma	0.000298308	-0.481	1	-0.049	not sig	1	0.288
spds-1	MSTRG.6190	spds-1	chrII:12809685-12810872	RI	soma	0.000322314	0.338	1	-0.033	not sig	1	-0.243
aqp-11	MSTRG.9370	NA	chrIII:13674410-13674746	RI	soma	0.000343598	-0.045	1	-0.005	not sig	1	-0.012
C41A3.2	MSTRG.23363	NA	chrX:5407578-5407824	RI	soma	0.000391077	0.127	1	-0.021	not sig	1	0.025
wdfy-3	MSTRG.13560	NA	chrIV:12661788-12662118	RI	soma	0.000428386	-0.401	1	-0.015	not sig	1	0.029
add-1	MSTRG.23250	NA	chrX:4854829-4855055	RI	soma	0.000704926	0.24	1	-0.023	not sig	1	-0.333
C02F5.12	MSTRG.8282	NA	chrIII:8240871-8242030	RI	soma	0.000712185	0.146	1	-0.007	not sig	1	-0.206
ZK1073.1	MSTRG.26000	ZK1073.1	chrX:16124150-16124575	RI	soma	0.000889929	0.088	1	0.01	not sig	1	0.034
ugt-59	MSTRG.12923	NA	chrIV:10362312-10362764	RI	soma	0.00278972	0.405	1	0.049	not sig	1	-0.2
D1086.10	MSTRG.20640	D1086.10	chrV:14082786-14083237	RI	soma	0.0031534	0.039	1	-0.003	not sig	1	-0.13
Y71A12B.13;Y71A12B.14	MSTRG.2790	NA	chrI:13969404-13970032	RI	soma	0.00332242	0.401	1	-0.095	not sig	1	-0.192
F42G2.2	MSTRG.3581	NA	chrII:2425087-2425344	RI	soma	0.00541938	0.132	1	0.013	not sig	1	0.2
lin-28	MSTRG.1598	NA	chrI:8410662-8411484	RI	soma	0.00779299	0.279	1	-0.083	not sig	1	0.023
math-27;math-26;math-3	MSTRG.3428	NA	chrII:1771808-1772261	RI	soma	0.00779299	0.178	1	0.04	not sig	1	0.209
F17C11.13	MSTRG.19654	NA	chrV:10955964-10956672	RI	soma	0.007992	0.059	1	-0.006	not sig	1	0
T11G6.3;T11G6.2	MSTRG.13039	NA	chrIV:10855108-10855936	RI	soma	0.0108001	-0.091	1	-0.025	not sig	1	0.005
fbxa-79	MSTRG.6851	NA	chrIII:1305715-1307488	RI	soma	0.0121688	-0.028	1	0.003	not sig	1	-0.025
srd-70	MSTRG.22115	srd-70	chrV:20455412-20456199	RI	soma	0.0133841	-0.667	1	0.245	not sig	1	0.571
C05D12.3	MSTRG.5864	NA	chrII:11424269-11425471	RI	soma	0.0135058	0.132	1	-0.085	not sig	1	0.133
hpo-30	MSTRG.20120	NA	chrV:12309029-12309509	RI	soma	0.0142724	0.129	1	0.024	not sig	1	0.391
T02C5.1	MSTRG.22737	NA	chrX:2696189-2696631	RI	soma	0.0148965	0.052	1	0.012	not sig	1	-0.073
nhr-179	MSTRG.17449	NA	chrV:1616394-1617540	RI	soma	0.0148965	-0.268	1	0.008	not sig	1	0.143
M28.8	MSTRG.5673	NA	chrII:10632276-10632595	RI	soma	0.0154179	0.446	1	0.054	not sig	1	0.667
atx-3	MSTRG.21032	mdt-28	chrV:15576710-15577326	RI	soma	0.0159391	0.327	1	-0.043	not sig	1	-0.271
Y46H3C.5;Y46H3C.7	MSTRG.17463	NA	chrV:1691859-1692596	RI	soma	0.0169095	0.247	1	-0.069	not sig	1	-0.024
pud-3;pud-4	MSTRG.17598	pud-4	chrV:2326677-2326936	RI	soma	0.0176434	0.085	1	-0.014	not sig	1	-0.333
T16G1.9	MSTRG.20333	NA	chrV:12950565-12951259	RI	soma	0.0191822	0.253	1	0.052	not sig	1	0.763
clr-1	MSTRG.4302	clr-1	chrII:5468883-5469174	RI	soma	0.0201495	-0.269	1	0.118	not sig	1	0.593
acr-7;T09A5.4	MSTRG.4982	NA	chrII:7846203-7846464	RI	soma	0.0220187	0.058	1	-0.017	not sig	1	1
klp-3	MSTRG.4981	NA	chrII:7843324-7843941	RI	soma	0.0236384	-0.033	1	-0.005	not sig	1	-0.103
nceh-1	MSTRG.21891	NA	chrV:19378313-19379605	RI	soma	0.0239871	-0.478	1	-0.226	not sig	1	-0.172
idh-2	MSTRG.24910	NA	chrX:11215695-11216161	RI	soma	0.0242215	0.106	1	0.121	not sig	1	-0.248
acdh-3;K06A5.3	MSTRG.1180	NA	chrI:6466751-6467033	RI	soma	0.0270234	-0.128	1	0.135	not sig	1	0.209
F58G11.4	MSTRG.20524	NA	chrV:13674764-13675394	RI	soma	0.0275407	-0.408	1	0.036	not sig	1	0.333
E02C12.8;anr-33	MSTRG.19163	E02C12.8	chrV:9371619-9372012	RI	soma	0.0308928	0.146	1	0.017	not sig	1	-0.333
sumv-2;pmt-2	MSTRG.17994	NA	chrV:4627237-4628874	RI	soma	0.0316934	-0.255	1	-0.048	not sig	1	0.05
him-4	MSTRG.24552	him-4	chrX:9732493-9732996	RI	soma	0.0334322	-0.232	1	0.04	not sig	1	-0.034
H20E11.1	MSTRG.11934	H20E11.1	chrIV:6831237-6832417	RI	soma	0.0427568	0.018	1	0.003	not sig	1	0.23
mif-4	MSTRG.11683	NA	chrIV:6335754-6336116	RI	soma	0.0451563	-0.046	1	-0.005	not sig	1	0.116
slc-17.7	MSTRG.19140	NA	chrV:9265885-9266501	RI	soma	0.0451646	-0.031	1	-0.003	not sig	1	0
D2096.10;D2096.11	MSTRG.12385	NA	chrIV:8388271-8389381	RI	soma	0.0473719	0.137	1	-0.112	not sig	1	-0.006
rlbp-1;lron-9	MSTRG.1457	NA	chrI:7684948-7685162	RI	soma	0.0478064	0.04	1	-0.007	not sig	1	0.003
B0432.10	MSTRG.3031	NA	chrII:285586-286275	RI	soma	0.0481479	0.055	1	-0.019	not sig	1	-0.111
R10E8.6	MSTRG.21664	NA	chrV:18262282-18263444	RI	soma	0.0485208	0.302	1	-0.024	not sig	1	1
C33C12.4;anr-48	MSTRG.3526	NA	chrII:2166266-2166752	RI	soma	0.048718	-0.165	1	0.044	not sig	1	0.385
btb-17	MSTRG.3763	NA	chrII:3295624-3296221	RI	soma	0	-0.443	1	-0.013	not sig	NA	NA
gbh-2	MSTRG.5148	NA	chrII:8486103-8486673	RI	soma	0	0.239	1	0.005	not sig	NA	NA
npr-7	MSTRG.24473	NA	chrX:9318152-9318507	RI	soma	5.90983e-08	-0.583	1	-0.141	not sig	NA	NA
math-27;math-3;F36H5.14	MSTRG.3428	NA	chrII:1775701-1776409	RI	soma	5.9997e-07	0.157	1	0.007	not sig	NA	NA
C01A2.1;W05H12.2;W05H12.4	MSTRG.2697	NA	chrI:13410998-13412841	RI	soma	4.37457e-06	-0.527	1	0.021	not sig	NA	NA
K05F6.4	MSTRG.3350	NA	chrII:1544087-1544407	RI	soma	5.02771e-06	0.667	1	0.063	not sig	NA	NA
fbxa-188;fbxa-189	MSTRG.21520	NA	chrV:17346130-17346367	RI	soma	8.37633e-06	-0.368	1	-0.03	not sig	NA	NA
flap-1	MSTRG.7973	NA	chrIII:6924799-6925043	RI	soma	2.04412e-05	-0.395	1	-0.064	not sig	NA	NA
drn-1	MSTRG.4240	NA	chrII:5271216-5271851	RI	soma	2.36586e-05	-0.042	1	-0.001	not sig	NA	NA
unc-24;F57H12.10	MSTRG.12283	NA	chrIV:7981117-7982005	RI	soma	2.36586e-05	0.279	1	0.043	not sig	NA	NA
C07B5.2	MSTRG.24506	C07B5.2	chrX:9517027-9517648	RI	soma	2.36586e-05	0.441	1	-0.126	not sig	NA	NA
dao-6;pqm-96	MSTRG.8677	NA	chrIII:9735258-9736050	RI	soma	2.552e-05	0.12	1	-0.004	not sig	NA	NA
npax-3;R13.9	MSTRG.13031	NA	chrIV:10827154-10827432	RI	soma	2.552e-05	-0.455	1	0.303	not sig	NA	NA
Y6G8.2	MSTRG.21609	Y6G8.2	chrV:17596408-17598660	RI	soma	4.28337e-05	0.7	1	0.069	not sig	NA	NA
mec-18	MSTRG.23098	NA	chrX:4272792-4272994	RI	soma	8.033e-05	-0.225	1	0.027	not sig	NA	NA
T08B6.2	MSTRG.10352	NA	chrIV:4896458-4896648	RI	soma	9.18801e-05	0.396	1	-0.014	not sig	NA	NA
twk-28	MSTRG.23100	NA	chrX:4279001-4279315	RI	soma	0.00016929	0.496	1	0.13	not sig	NA	NA
C31H5.1	MSTRG.1751	C31H5.1	chrI:9026910-9027180	RI	soma	0.000189125	-0.65	1	0.018	not sig	NA	NA
nhr-152	MSTRG.18727	nhr-152	chrV:7686978-7687259	RI	soma	0.000277267	0.393	1	0.044	not sig	NA	NA
str-253	MSTRG.17576	str-253	chrV:2252950-2253263	RI	soma	0.000712185	-0.629	1	0.059	not sig	NA	NA
F41E6.5	MSTRG.18965	F41E6.5	chrV:8604555-8604897	RI	soma	0.000712185	0.039	1	-0.005	not sig	NA	NA
Y102A11A.9	MSTRG.22583	Y102A11A.9	chrX:2014577-2014853	RI	soma	0.000891673	-0.272	1	0.059	not sig	NA	NA
H13N06.2	MSTRG.25874	NA	chrX:15491299-15491987	RI	soma	0.00116614	-0.117	1	0.006	not sig	NA	NA
Y82E9BR.5;pals-20	MSTRG.6874	NA	chrIII:1387394-1387945	RI	soma	0.0013972	0.419	1	-0.165	not sig	NA	NA
F19C7.4	MSTRG.10222	NA	chrIV:4603535-4604119	RI	soma	0.00174854	0.36	1	0.023	not sig	NA	NA
F40E3.5;F40E3.6	MSTRG.373	F40E3.6	chrI:2651490-2651711	RI	soma	0.00178555	0.316	1	0.488	not sig	NA	NA
2L52.1	MSTRG.2971	NA	chrII:1961-2694	RI	soma	0.00185827	0.273	1	0.006	not sig	NA	NA
Y51A2D.13	MSTRG.21718	NA	chrV:18573610-18574113	RI	soma	0.00201539	0.277	1	-0.011	not sig	NA	NA
21ur-11363;C17H12.11	MSTRG.11921	NA	chrIV:6804015-6804905	RI	soma	0.00226786	0.304	1	-0.013	not sig	NA	NA
ztf-26	MSTRG.1711	NA	chrI:8861115-8861872	RI	soma	0.00241729	0.47	1	0.425	not sig	NA	NA
dhs-7	MSTRG.4816	dhs-7	chrII:7207822-7208082	RI	soma	0.00284074	0.152	1	-0.02	not sig	NA	NA
gpa-6	MSTRG.25314	NA	chrX:13191698-13192063	RI	soma	0.00407573	-0.295	1	0.002	not sig	NA	NA
fbxa-186	MSTRG.21519	NA	chrV:17336357-17336751	RI	soma	0.00531052	0.303	1	0.063	not sig	NA	NA
srb-5	MSTRG.4202	NA	chrII:5162668-5163447	RI	soma	0.0054113	0.473	1	0.324	not sig	NA	NA
W09G12.3	MSTRG.9594	NA	chrIV:1205996-1206403	RI	soma	0.00640228	0.449	1	-0.17	not sig	NA	NA
C45E5.3	MSTRG.11089	NA	chrIV:5740042-5740656	RI	soma	0.00691496	0.34	1	0.003	not sig	NA	NA
ZK863.8	MSTRG.20071	NA	chrV:12187272-12187524	RI	soma	0.00691496	-0.152	1	0.028	not sig	NA	NA
ZC434.9	MSTRG.2101	ZC434.9	chrI:10358982-10359488	RI	soma	0.00730984	-0.297	1	-0.042	not sig	NA	NA
moc-2	MSTRG.18442	moc-2	chrV:6503290-6503591	RI	soma	0.00972024	0.257	1	0.034	not sig	NA	NA
nhr-50	MSTRG.21102	nhr-50	chrV:15997831-15998455	RI	soma	0.00977476	-0.037	1	0.002	not sig	NA	NA
twk-24	MSTRG.20106	NA	chrV:12267751-12268120	RI	soma	0.0101728	0.087	1	-0.017	not sig	NA	NA
sra-36	MSTRG.4026	NA	chrII:4539839-4540219	RI	soma	0.0112235	-0.545	1	0.05	not sig	NA	NA
Y17D7B.3	MSTRG.21764	Y17D7B.3	chrV:18786439-18786934	RI	soma	0.0121688	0.412	1	-0.17	not sig	NA	NA
abu-8;C03A7.13	MSTRG.18112	abu-8	chrV:5191104-5191527	RI	soma	0.0121688	0.244	1	-0.063	not sig	NA	NA
nhr-152	MSTRG.18727	nhr-152	chrV:7686381-7686547	RI	soma	0.0127537	0.11	1	0.035	not sig	NA	NA
daao-1	MSTRG.9811	NA	chrIV:2614193-2614475	RI	soma	0.0152137	-0.119	1	-0.032	not sig	NA	NA
pqn-10	MSTRG.7889	NA	chrIII:6531382-6532310	RI	soma	0.0159391	0.419	1	0.251	not sig	NA	NA
ntl-4;C49H3.4	MSTRG.12261	NA	chrIV:7913727-7915523	RI	soma	0.0230722	0.198	1	0.05	not sig	NA	NA
F46F5.15	MSTRG.3139	NA	chrII:788524-788844	RI	soma	0.0241031	-0.361	1	0.162	not sig	NA	NA
emre-1	MSTRG.25735	NA	chrX:14979894-14980950	RI	soma	0.0246175	-0.161	1	0.009	not sig	NA	NA
chil-25	MSTRG.5407	NA	chrII:9472690-9473549	RI	soma	0.0255886	-0.333	1	0.035	not sig	NA	NA
fbxa-51	MSTRG.6772	NA	chrIII:963313-963826	RI	soma	0.0275457	0.131	1	-0.043	not sig	NA	NA
W04H10.2;W04H10.5	MSTRG.3107	NA	chrII:605765-606423	RI	soma	0.0311781	0.361	1	0.271	not sig	NA	NA
aagr-1;D2096.6	MSTRG.12380	NA	chrIV:8368767-8369884	RI	soma	0.0321194	-0.259	1	-0.018	not sig	NA	NA
Y82E9BR.6	MSTRG.6871	NA	chrIII:1381559-1381900	RI	soma	0.03394	-0.243	1	-0.044	not sig	NA	NA
M01B2.10	MSTRG.20962	NA	chrV:15262135-15262420	RI	soma	0.0340725	-0.464	1	0.244	not sig	NA	NA
try-10;F15B9.15	MSTRG.20359	NA	chrV:13011391-13011740	RI	soma	0.038245	0.033	1	0.007	not sig	NA	NA
nlp-7	MSTRG.24264	nlp-7	chrX:8593666-8593974	RI	soma	0.0466177	0.014	1	-0.002	not sig	NA	NA
M02E1.4	MSTRG.22268	NA	chrX:313273-313527	RI	soma	0.0481479	0.041	1	-0.016	not sig	NA	NA
	MSTRG.8616	sod-4	chrIII:9500245-9500737	RI	soma	0.0496682	0.39	1	-0.411	not sig	NA	NA
F44E2.10	MSTRG.8449	NA	chrIII:8830961-8831258	RI	soma	0.00116553	0.307	NA	NA	Sperm Enriched	0	0.616
rpa-4	MSTRG.940	NA	chrI:5510242-5510598	RI	soma	0.000711023	-0.226	NA	NA	not sig	0.245631	0.015
zim-1;zim-2	MSTRG.12966	NA	chrIV:10555302-10555747	RI	soma	0.0123857	-0.214	NA	NA	not sig	1	-0.009
tsn-1;tag-151	MSTRG.4061	NA	chrII:4709579-4710399	RI	soma	0.0398236	0.386	NA	NA	not sig	1	-0.008
4R79.2	MSTRG.17177	NA	chrIV:17482308-17482517	RI	soma	1.41919e-05	-0.237	NA	NA	not sig	NA	NA
C40C9.3	MSTRG.25432	C40C9.3	chrX:13647834-13648040	RI	soma	0.0100001	0.152	NA	NA	not sig	NA	NA
F49D11.2	MSTRG.2245	NA	chrI:10922087-10922524	RI	soma	0.0179582	-0.558	NA	NA	not sig	NA	NA
ceh-89	MSTRG.25549	NA	chrX:14142373-14142490	SE	soma	0.00139164	-0.154	0.0788498	-0.048	not sig	1	0.023
unc-52	MSTRG.6521	NA	chrII:14658037-14658334	SE	soma	0.00125197	0.342	0.0851179	-0.189	not sig	1	0.045
fln-1	MSTRG.9449	fln-1	chrIV:363975-364128	SE	soma	4.31305e-08	-0.246	0.109881	-0.089	not sig	1	-0.018
hlb-1	MSTRG.25480	NA	chrX:13871711-13871997	SE	soma	0.000663171	0.368	0.111321	-0.1	not sig	NA	NA
D2024.5	MSTRG.12064	NA	chrIV:7227551-7227617	SE	soma	0.0102724	0.025	0.122964	0.026	not sig	NA	NA
dur-1	MSTRG.12781	NA	chrIV:9925943-9925997	SE	soma	1.02358e-11	-0.312	0.158485	-0.091	not sig	NA	NA
gyg-1	MSTRG.22923	NA	chrX:3539445-3539823	SE	soma	0.00109021	-0.179	0.169177	0.094	not sig	1	0.033
unc-16	MSTRG.8629	NA	chrIII:9550365-9550383	SE	soma	0.0204222	-0.172	0.187212	0.043	not sig	1	-0.038
T23G7.2	MSTRG.5324	W07A12.8	chrII:9169528-9169776	SE	soma	0.0282527	-0.127	0.187694	-0.083	not sig	1	-0.01
T23E7.2	MSTRG.26257	NA	chrX:17678670-17678772	SE	soma	0.0323969	-0.169	0.19176	0.09	not sig	1	-0.006
2019-06-01	MSTRG.5313	NA	chrII:9127361-9127627	SE	soma	0.0339257	-0.138	0.230966	-0.067	Oocyte Enriched	0.0285338	0.156
ztf-26	MSTRG.1711	NA	chrI:8855117-8855447	SE	soma	0.0168532	0.078	0.239781	0.054	not sig	1	0.002
T13H5.1	MSTRG.5149	NA	chrII:8501365-8501732	SE	soma	0.0229483	-0.189	0.239781	-0.145	not sig	1	0.5
sol-1	MSTRG.1406	NA	chrI:7392205-7392263	SE	soma	0.00647719	-0.295	0.251413	-0.137	not sig	NA	NA
top-1	MSTRG.2675	top-1	chrI:13293528-13293744	SE	soma	0.000201285	-0.114	0.284657	-0.058	not sig	1	0.011
btb-21	MSTRG.17856	NA	chrV:3851176-3851310	SE	soma	0.0179155	-0.187	0.28799	0.111	not sig	NA	NA
unc-16	MSTRG.8629	NA	chrIII:9550136-9550235	SE	soma	0.0329683	-0.121	0.292644	-0.138	Sperm Enriched	8.09851e-05	-0.033
[truncated: 1,097 more rows]
